# Supplementary material
Source: publisher figshare collection journal article supplement (https://acs.figshare.com/ndownloader/files/23773340)
Supplement: Supplementary file 1 [file 23773340]

## Sheet: Ref
MS-CleanR: A feature-filtering approach to improve annotation rate in untargeted LC-MS based metabolomics
Ophélie Fraisier-Vannier1,4, Justine Chervin2,3, Guillaume Cabanac4, Virginie Puech-Pages2,3, Sylvie Fournier2,3, Virginie Durand2, Aurélien Amiel2,5, Olivier André2,5, Omar Abdelaziz Benamar2,5, Bernard Dumas2, Hiroshi Tsugawa6,7 and Guillaume Marti1,2,3,4*
1 Pharma Dev, Université de Toulouse, IRD, UPS, Toulouse, France
2 Laboratoire de Recherche en Sciences Végétales, Université de Toulouse, CNRS, UPS, France
3 Metatoul-AgromiX platform, MetaboHUB, National Infrastructure for Metabolomics and Fluxomics, LRSV, Université de Toulouse, CNRS, UPS, France
4 Institut de Recherche en Informatique de Toulouse, Université de Toulouse, UPS, Toulouse, France
5 De Sangosse, Bonnel, 47480 Pont-Du-Casse, France
6 RIKEN Center for Sustainable Resource Science, Yokohama, Japan
7 RIKEN Center for Integrative Medical Sciences, Yokohama, Japan

## Sheet: MS-CleanR-Data
cluster	selected_feature	annotation_result	annotation_warning	cluster.size	source	Alignment.ID	Average.Rt.min.	Average.Mz	Adduct.type	level	Formula	Annotation-level 2	Total.score	Final.score	Annotation-level 1	MS1.count	MSMS.count	PRECURSORMZ	PRECURSORTYPE	Theoretical.mass	Mass.error	Formula.score	Ontology	InChIKey	SMILES	Biosoc	Classyfire_class	Classyfire_subclass	Compound_level	Internal_id	Links	FD.1	FD.2	FD.3	FD.4	FD.5	FD.6	FD.7	FD.8	FD.9	FD.10	Hydro.1	Hydro.2	Hydro.3	Hydro.4	Hydro.5	Hydro.6	Hydro.7	Hydro.8
Class																																Jiffy	Jiffy	Jiffy	Jiffy	Jiffy	Jiffy	Jiffy	Jiffy	Jiffy	Jiffy	Hydro	Hydro	Hydro	Hydro	Hydro	Hydro	Hydro	Hydro
1	neg_100	Simple ID		1	neg	100	1.699	209.067	[M-H]-	genus	C7H14O7	(2S,3R,4R,5R,6R)-6-[(1R)-1,2-dihydroxyethyl]oxane-2,3,4,5-tetrol	6.3094	12.6188	Unknown	3	7	209.067	[M-H]-	210.074	-0.0001237	3.609		BGWQRWREUZVRGI-XJWWOKRRSA-N	OCC(O)C1OC(O)C(O)C(O)C1(O)	Arabidopsis thaliana|Festuca	Organooxygen compounds	Carbohydrates and carbohydrate conjugates	1a	1989	chebi:90765|pmid:26136755|reaxys registry number:2327958	1.4566	1.3286	1.2787	1.3233	1.3945	1.2638	1.0483	0.8228	1.4929	1.3059	0.752	0.7375	0.799	0.8074	0.7583	0.7638	0.7278	0.7187
2	neg_110	Simple ID		1	neg	110	6.824	218.104	[M-H]-	genus	C9H17NO5	3-{[(2R)-1,2,4-trihydroxy-3,3-dimethylbutylidene]amino}propanoic acid	5.5822	11.1644	Unknown	3	5	218.103	[M-H]-	219.111	-0.0001038	3.554		GHOKWGTUZJEAQD-JLDDOWRYNA-N	O=C(O)CCN=C(O)C(O)C(C)(C)CO	Arabidopsis thaliana|Escherichia coli			1a	202034	knapsack:C00001550|cas:79-83-4	0.5236	0.4471	0.4426	0.4762	0.4366	0.3657	0.4024	0.281	0.5495	0.4364	0.5518	0.6217	0.594	0.672	0.5966	0.5564	0.5356	0.6125
3	neg_113	Simple ID		1	neg	113	10.114	219.031	[M-H]-	genus	C11H8O5	8-Acetyl-6,7-dihydroxycoumarin	4.3811	8.7622	Unknown	3	4	219.031	[M-H]-	220.037	-0.0008031	2.654		OROSMKFQCKAQAM-UHFFFAOYSA-N	O=C1OC=2C(C=C1)=CC(O)=C(O)C=2(C(=O)C)		Coumarins and derivatives	Hydroxycoumarins	1b	1058071	dnp:LLK63	0.3627	1.064	0.5342	0.3134	0.0823	0.3465	0.2632	0.3763	0.4723	0.7222	1.0603	0.8366	1.1122	0.944	0.0938	0.5504	0.8056	0.7504
4	neg_121	Simple ID		1	neg	121	6.053	224.057	[M-H]-	genus	C10H11NO5	2-{[(1R,6R)-6-amino-3-carboxycyclohexa-2,4-dien-1-yl]oxy}prop-2-enoate	6.1125	12.225	Unknown	3	7	224.057	[M-H]-	225.064	-0.000154	3.738		OIUJHGOLFKDBSU-HTQZYQBOSA-M	O=C([O-])C(OC1C=C(C=CC1(N))C(=O)O)=C	Aegilops tauschii|Ananas comosus|Aquilegia coerulea|Arabidopsis halleri|Asparagus officinalis|Beta vulgaris|Brachypodium distachyon|Brassica napus|Brassica rapa|Calotropis gigantea|Capsella grandiflora|Capsicum annuum|Carica papaya|Catharanthus roseus|Coccomyxa|Corchorus capsularis|Cucumis sativus|Daucus carota|Eutrema salsugineum|Gossypium raimondii|Helianthus annuus|Hordeum vulgare|Kalanchoe la…	Carboxylic acids and derivatives	Dicarboxylic acids and derivatives	1a	20944	chebi:58406|plantcyc:4-AMINO-4-DEOXYCHORISMATE|bigg:214284|cas:97279-79-3|kegg ligand:C11355|pubchem cid:25244713	1.0672	1.0142	0.7393	0.9135	0.9548	0.8264	0.6778	0.4358	1.3946	1.0247	0.1407	0.1441	0.1798	0.1869	0.1572	0.2079	0.1915	0.2159
5	neg_131	Unknown compound		1	neg	131	1.258	237.084	[M-H]-	Unknown																						0.7264	0.7849	1.084	1.2691	0.2864	0.3453	0.9429	0.8383	0.4121	0.4771	1.551	1.9124	2.2464	1.9356	2.7161	1.716	3.1198	3.2599
6	neg_134	Simple ID		1	neg	134	1.546	239.077	[M-H]-	generic	C8H16O8	D-glycero-L-galacto-Octulose	4.9	4.9	Unknown	3	5	239.077	[M-H]-	240.085	4.1e-05	2.818	C-glycosyl compounds	HYWDXGGHANXDIV-UHFFFAOYNA-N	OCC(O)C1OC(O)(CO)C(O)C(O)C1(O)						HMDB=HMDB0029954,FooDB=FDB012594,UNPD=UNPD128710	0.7755	0.4972	0	0.4975	0.3913	0.4078	0.4771	0.3517	0.6178	0.7672	0.9506	0.9871	1.1194	1.0809	0.8805	1.0787	0.6813	1.0127
7	neg_145	Simple ID		1	neg	145	1.278	245.043	[M-H]-	generic	C6H15O8P	glycerophosphoglycerol	4.9182	4.9182	Unknown	3	4	245.043	[M-H]-	246.05	0.0001776	2.808	Dialkyl phosphates	LLCSXHMJULHSJN-UHFFFAOYNA-N	O=P(O)(OCC(O)CO)OCC(O)CO						ChEBI=CHEBI:5457;CHEBI:61933;CHEBI:64717;CHEBI:64956;CHEBI:84515;CHEBI:85411,PlantCyc=GLYCEROPHOSPHOGLYCEROL,BLEXP=BLEXPDB00000439964	9.0072	6.8705	9.7914	8.1891	9.7967	9.9222	7.767	8.0827	12.6222	13.44	1.9244	1.6576	1.5025	1.5089	2.0613	1.7116	1.8894	1.7263
8	neg_154	Unknown compound		1	neg	154	14.157	251.096	[M-H]-	Unknown																						0.0111	0.0052	0.0068	0.0075	0.9768	0.0075	0.0073	0.0066	0.0091	0.0164	0	0.0079	0.0049	0.0089	0.2341	0.0045	0	0.0064
9	neg_157	Simple ID		1	neg	157	4.246	253.093	[M-H]-	genus	C9H18O8	(2R,3R,4S,5S,6S)-2-[(2S)-2,3-dihydroxypropoxy]-6-(hydroxymethyl)oxane-3,4,5-triol	4.8151	9.6302	Unknown	3	5	253.093	[M-H]-	254.1	9.11e-05	3.254		NHJUPBDCSOGIKX-FMSIVIABNA-N	OCC(O)COC1OC(CO)C(O)C(O)C1(O)	Escherichia coli	Glycerolipids	Glycosylglycerols	1b	175949	knapsack:C00019351|cas:7420-23-7	0.0696	0.0557	0.053	0.0689	0.0655	0.0573	0.0644	0.0361	0.0731	0.0736	0.5835	0.7649	0.7055	0.8319	0.7642	0.7322	0.8283	0.7567
10	neg_179	Simple ID		1	neg	179	5.647	282.085	[M-H]-	Standard	C10H13N5O5	Adenosine; 3-Oxide	6.9729	13.9458	(IROA) GUANOSINE	3	5	282.085	[M-H]-	283.092	-0.0003079	4.308		DCTXNMJSWWZEQR-UHFFFAOYSA-N	O=N=2C=NC(N)=C1N=CN(C1=2)C3OC(CO)C(O)C3(O)		Purine nucleosides		1b	1062636	dnp:GQO96	0.849	0.5558	1.0179	0.7079	0.5056	0.5651	0.586	0.342	0.6258	0.7552	0.4823	0.4338	0.5046	0.5557	0.4334	0.4558	0.5063	0.5321
11	neg_18	Simple ID		1	neg	18	1.361	135.03	[M-H]-	genus	C4H8O5	2,3,4-Trihydroxybutanoic acid|2,3,4-Trihydroxybutanoic acid; (2R,3R)-form|2,3,4-Trihydroxybutanoic acid; (2R,3S)-form|2,3,4-Trihydroxybutanoic acid; (2RS,3RS)-form|2,3,4-Trihydroxybutanoic acid; (2RS,3SR)-form|2,3,4-Trihydroxybutanoic acid; (2S,3R)-form|2,3,4-Trihydroxybutanoic acid; (2S,3S)-form	5.5417	11.0834	Unknown	3	3	135.03	[M-H]-	136.037	9.69e-05	3.378		JPIJQSOTBSSVTP-UHFFFAOYSA-N	O=C(O)C(O)C(O)CO		Organooxygen compounds	Carbohydrates and carbohydrate conjugates	1b	14309	dnp:CTV10|chebi:49060|lipid maps:LMFA01050097|beilstein registry number:2205459|cas:7306-96-9|chemspider:388628|kegg compounds:C01620	0.5691	0.6002	0.9337	0.7597	0.6374	0.5654	0.6417	0.6166	0.8117	0.6873	0.1888	0.1783	0.1947	0.2073	0.2109	0.2164	0.2401	0.2287
12	neg_190	Unknown compound		1	neg	190	4.732	289.068	[M-H]-	Unknown																						0.5772	0.3596	0.7942	0.4096	0.3071	0.3524	0.4335	0.3039	0.4232	0.5695	0.3496	0.349	0.3851	0.5022	0.4438	0.4144	0.4861	0.5231
13	neg_193	Unknown compound		1	neg	193	1.212	292.072	[M-H]-	Unknown																						0.2063	0.1267	0.1069	0.144	0.3397	0.2714	0.0999	0.1608	0.8017	0.7666	0.6031	0.4758	0.4358	0.397	0.7298	0.5795	0.6638	0.5461
14	neg_196	Simple ID		1	neg	196	16.158	293.176	[M-H]-	family	C17H26O4	7,11-Epoxy-6-hydroxy-8-eremophilanone; Ac	5.6819	8.52285	Unknown	3	11	293.176	[M-H]-	294.183	-0.0004671	3.668		DPWOQVYZNDXRAN-UHFFFAOYSA-N	O=C(OC2C1(OC1(C)(C))(C(=O)CC3CCCC(C)C23(C)))C	Ligularia subspicata	Carboxylic acids and derivatives	Carboxylic acid derivatives	1a	1069902	dnp:QOK16	1.2676	1.3031	1.4142	1.5008	1.1902	1.0737	1.2564	0.8806	2.1527	1.5335	0.9466	1.0961	0.8322	0.8912	1.3332	1.2008	1.2602	0.91
15	neg_201	Simple ID		1	neg	201	5.717	297.119	[M-H]-	generic	C16H18N4S	4'-N-desmethylolanzapine	3.9839	3.9839	Unknown	3	2	297.119	[M-H]-	298.125	-0.0013589	2.465	Benzodiazepines	FHPIXVHJEIZKJW-UHFFFAOYSA-N	N=2C4=CC=CC=C4(NC1=C(C=C(C)S1)C=2N3CCNCC3)						HMDB=HMDB0060959,STOFF=STOFF_8796,Urine=HMDB0060959,Serum=HMDB0060959,BLEXP=BLEXPDB00135446209	0.2182	0.2274	0.2364	0.2928	0.2277	0.1985	0.2119	0.1396	0.3009	0.2392	0.755	0.7591	0.8642	0.895	0.8749	0.8173	1.0144	0.6941
16	neg_203	Unknown compound		1	neg	203	12.356	299.027	[M-H]-	Unknown																						1.3757	1.1639	1.3789	2.0193	0.0812	1.0383	1.443	0.8363	1.3451	1.4073	0.3352	0.6426	0.5015	0.5665	0.0297	0.7465	0.5969	0.6383
17	neg_204	Unknown compound		1	neg	204	11.572	299.027	[M-H]-	Unknown																						0.7996	0.4901	0.822	1.2813	0.0064	0.7238	0.9598	0.5622	0.7294	0.9697	0.1515	0.2426	0.1893	0.2594	0.0049	0.3758	0.2315	0.298
18	neg_205	Simple ID		1	neg	205	7.866	299.077	[M-C6H10O5-H]-	family	C19H26O13	4-Hydroxybenzoic acid; ?-D-Glucopyranosyl ester, O-?-D-glucopyranoside	5.0599	7.58985	Unknown	3	2	299.077	[M-C6H10O5-H]-	462.137	-0.000159	2.963		MMVLVHFEKMGNDI-UHFFFAOYSA-N	O=C(OC1OC(CO)C(O)C(O)C1(O))C3=CC=C(OC2OC(CO)C(O)C(O)C2(O))C=C3	Moricandia arvensis	Organooxygen compounds	Carbohydrates and carbohydrate conjugates	1a	1048544	dnp:ONC54	1.1641	1.2116	0.6295	0.5497	0.7898	0.7359	0.4602	0.4639	0.5401	0.4619	0.1778	0.1644	0.1493	0.2164	0.2307	0.1464	0.1819	0.1554
19	neg_209	Unknown compound		1	neg	209	6.423	303.072	[M-H]-	Unknown																						0	0	0	0	0	0	0	0	0.0032	0	4.5326	3.7838	3.2774	3.6788	3.7063	3.5197	3.4848	3.2694
20	neg_215	Simple ID		1	neg	215	9.118	307.086	[M-H]-	genus	C12H20O7S	[(1R,2R)-3-oxo-2-[5-(sulfooxy)pentyl]cyclopentyl]acetic acid	5.7837	11.5674	Unknown	3	7	307.086	[M-H]-	308.093	-0.0004025	3.362		CJUJDLFIAYZPPV-NXEZZACHSA-N	O=C(O)CC1CCC(=O)C1(CCCCCOS(=O)(=O)O)	Arabidopsis thaliana	Fatty Acyls	Lineolic acids and derivatives	1a	3325	chebi:91169	0.6664	0.8535	0.1246	0.112	1.124	0.8545	0.1379	0.3263	0.2602	0.2688	0.2753	0.4575	0.3022	0.2776	0.3956	0.3668	0.3061	0.2273
21	neg_216	Simple ID		1	neg	216	5.956	309.119	[M-H]-	genus	C12H22O9	4-O-?-L-Fucopyranosyl-L-fucose; ?-Pyranose-form|4-O-?-L-Rhamnopyranosyl-L-rhamnose; ?-Pyranose-form|4-O-?-L-Fucopyranosyl-L-fucose; ?-Pyranose-form|4-O-?-L-Rhamnopyranosyl-L-rhamnose; Pyranose-form|4-O-?-L-Rhamnopyranosyl-L-rhamnose; ?-Pyranose-form	6.0073	12.0146	Unknown	3	9	309.119	[M-H]-	310.126	-0.0002942	3.412		CBMZDPBVDFEWRY-UHFFFAOYSA-N	OC2OC(C)C(OC1OC(C)C(O)C(O)C1(O))C(O)C2(O)		Organooxygen compounds	Carbohydrates and carbohydrate conjugates	1b	980281	dnp:MDP17	0.344	0.3553	0.3715	0.3652	0.4438	0.3802	0.3617	0.2771	0.3956	0.3433	0.9835	0.8475	1.1332	0.8191	0.9193	1.0253	1.0406	1.1041
22	neg_217	Simple ID		1	neg	217	6.384	309.119	[M-H]-	genus	C12H22O9	4-O-?-L-Fucopyranosyl-L-fucose; ?-Pyranose-form|4-O-?-L-Rhamnopyranosyl-L-rhamnose; ?-Pyranose-form|4-O-?-L-Fucopyranosyl-L-fucose; ?-Pyranose-form|4-O-?-L-Rhamnopyranosyl-L-rhamnose; Pyranose-form|4-O-?-L-Rhamnopyranosyl-L-rhamnose; ?-Pyranose-form	6.6696	13.3392	Unknown	3	8	309.119	[M-H]-	310.126	-0.0002942	3.733		CBMZDPBVDFEWRY-UHFFFAOYSA-N	OC2OC(C)C(OC1OC(C)C(O)C(O)C1(O))C(O)C2(O)		Organooxygen compounds	Carbohydrates and carbohydrate conjugates	1b	980281	dnp:MDP17	0.8313	0.7587	0.8525	0.8321	0.7442	0.7327	0.5898	0.5759	0.6711	0.7608	1.1309	1.1368	1.1885	1.1471	1.1349	1.322	1.3039	1.2795
23	neg_17	Simple ID		2	neg	17	5.608	134.047	[M-H]-	Standard	C5H5N5	Adenine; 1H-form|Adenine; 3H-form|Adenine; 7H-form|Adenine; 9H-form	7.8122	15.6244	(IROA) ADENINE	3	3	134.047	[M-H]-	135.054	1.87e-05	5.163		GFFGJBXGBJISGV-UHFFFAOYSA-N	N=1C=NC2=C(N=CNC=12)N	Aegilops tauschii|Ananas comosus|Annona purpurea|Aquilegia coerulea|Arabidopsis halleri|Arabidopsis thaliana|Asparagus officinalis|Astragalus mongholicus|Beta vulgaris|Boechera stricta|Brachypodium distachyon|Brassica rapa|Camellia kissi|Camellia ptilophylla|Camellia sinensis|Camellia taliensis|Capsicum annuum|Carica papaya|Catharanthus roseus|Cicer arietinum|Citrus|Coccomyxa|Coffea arabica|Coffe…	Imidazopyrimidines	Purines and purine derivatives	1a	7247	dnp:HCF69|chebi:16708|hmdb:HMDB0000034|knapsack:C00001490|plantcyc:ADENINE|t3db:T3D4279|unpd:UNPD128555|beilstein registry number:608603|bigg:ade|biocyc:ADENINE|bmdb:BMDB00034|cas:134434-48-3|chembl:CHEMBL226345|chemspider:185|drug central:89|drugbank:DB00173|foodb:FDB012266|gmelin registry number:3903|kegg compounds:C00147|kegg drug:D00034|kegg ligand:C00147|metabolights:MTBLC16708|metacyc:ADENI…	0.7595	0.4106	0.88	0.482	0.3612	0.4067	0.5242	0.322	0.4736	0.5998	0.2351	0.2174	0.2976	0.2171	0.2089	0.2452	0.2316	0.2372
24	neg_14	Simple ID		2	neg	14	1.199	132.03	[M-H]-	Standard	C4H7NO4	Aspartic acid|Aspartic acid; (R)-form|Aspartic acid; (S)-form|Aspartic acid; (?)-form	6.6916	13.3832	(IROA) ASPARTATE	3	4	132.03	[M-H]-	133.038	0.0001313	4.024		CKLJMWTZIZZHCS-UHFFFAOYSA-N	O=C(O)CC(N)C(=O)O	Arabidopsis thaliana|Astragalus mongholicus|Brassica napus|Caenorhabditis elegans|Daphnia|Escherichia coli|Homo sapiens|Mus|Oryza sativa|Panax ginseng|Populus deltoides|Pseudomonas putida|Ruegeria pomeroyi|Saccharomyces cerevisiae|Sea|Solanum|Synechococcus elongatus	Carboxylic acids and derivatives	Amino acids, peptides, and analogues	1a	3368	dnp:FNR91|chebi:22660|hmdb:HMDB0062186|beilstein registry number:774618|cas:617-45-8|gmelin registry number:185140|kegg compounds:C16433|pmid:22264337|pubchem cid:424|reaxys registry number:774618|wikipedia:Aspartic_acid	19.3605	18.7956	25.3949	28.4927	23.5769	22.9304	24.171	21.6165	31.46	28.9378	9.6969	11.0189	14.332	12.8461	15.1625	14.1971	17.8187	15.9827
25	neg_228	Simple ID	Other possible annotated peaks for this cluster.	2	neg	228	17.555	321.063	[M-H]-	generic	C15H14O8	2-(3,4,5-trihydroxyphenyl)-3,4-dihydro-2H-1-benzopyran-3,4,5,7-tetrol	4.4791	4.4791	Unknown	3	9	321.063	[M-H]-	322.069	-0.001309	2.335	Epigallocatechins	ZEACOKJOQLAYTD-UHFFFAOYNA-N	OC3=CC(O)=C2C(OC(C1=CC(O)=C(O)C(O)=C1)C(O)C2(O))=C3						HMDB=HMDB0136090,KNApSAcK=C00008992;C00020637,ChEBI=CHEBI:6417;CHEBI:71216,FooDB=FDB018307,LipidMAPS=LMPK12020209,PubChem=59024521;3081374;440835,PlantCyc=CPD-7088,UNPD=UNPD149961,BLEXP=BLEXPDB00003081374	2.8606	1.8455	3.884	3.1162	0	2.6223	2.7933	2.0313	3.2065	3.295	0.6072	1.465	0.9028	1.4594	0	2.3623	1.2865	1.402
26	neg_229	Simple ID	Other possible annotated peaks for this cluster.	2	neg	229	17.403	321.063	[M-H]-	genus	C15H14O8	3,3',4',5,6,7,8-Heptahydroxyflavan|3,3',4',5,6,7,8-Heptahydroxyflavan; (2R,3R)-form|3,3',4',5,6,7,8-Heptahydroxyflavan; (2R,3S)-form	3.2812	6.5624	Unknown	3	10	321.063	[M-H]-	322.069	-0.001409	2.202		PONGJRZSHJPTOF-UHFFFAOYSA-N	OC=1C=CC(=CC=1(O))C3OC2=C(O)C(O)=C(O)C(O)=C2CC3(O)	Elephantorrhiza|Garcinia dulcis|Wisteria floribunda	Flavonoids	Flavans	1b	980815	dnp:KWZ65	0.5829	0.4351	0.6205	0.5159	0.0096	0.4665	0.4928	0.3642	0.701	0.4451	0.21	0.473	0.2517	0.4939	0	0.6173	0.3868	0.4808
27	neg_23	Simple ID		1	neg	23	1.487	146.046	[M-H]-	genus	C5H9NO4	L-glutamic acid	5.6084	11.2168	Unknown	3	3	146.046	[M-H]-	147.053	-1.87e-05	3.783		WHUUTDBJXJRKMK-YEQUQEJONA-N	O=C(O)CCC(N)C(=O)O	Arabidopsis thaliana|Curcuma|Escherichia coli|Pisum sativum|Trifolium pratense|Trifolium repens	Carboxylic acids and derivatives	Amino acids, peptides, and analogues	1a	169767	knapsack:C00001358|cas:56-86-0	7.4549	6.6783	7.058	7.5917	6.8246	5.6293	5.1546	4.019	6.5567	5.5056	4.0017	4.5015	4.5649	3.824	3.3549	3.2142	3.163	2.8457
28	neg_231	Simple ID		1	neg	231	9.08	322.093	[M-H]-	genus	C15H17NO7	(2S,3R,4S,5S,6R)-3,4,5-trihydroxy-6-(hydroxymethyl)oxan-2-yl 1H-indole-3-carboxylate	6.1251	12.2502	Unknown	3	10	322.093	[M-H]-	323.101	2.54e-05	3.39		OQZPHKHJQADXAS-PGDAIQCRNA-N	O=C(OC1OC(CO)C(O)C(O)C1(O))C3=CNC2=CC=CC=C23	Arabidopsis thaliana	Indoles and derivatives	Indolecarboxylic acids and derivatives	1a	170489	chebi:65021|knapsack:C00007576	0.7502	0.5253	0.147	0.3514	0.4322	0.3323	0.2563	0.0942	0.3544	0.2032	0.7536	0.8705	0.8454	0.8825	0.8185	0.7571	0.9487	0.8267
29	neg_233	Simple ID		1	neg	233	7.417	323.135	[M-H]-	genus	C13H24O9	4-O-?-L-Fucopyranosyl-L-fucose; Me glycoside|4-O-?-L-Rhamnopyranosyl-L-rhamnose; Me glycoside|4-O-?-L-Fucopyranosyl-L-fucose; Me glycoside|4-O-?-L-Rhamnopyranosyl-L-rhamnose; Me glycoside	6.9652	13.9304	Unknown	3	7	323.135	[M-H]-	324.142	-0.0001441	4.071		ZIWJTDXGUWDLMS-UHFFFAOYSA-N	OC1C(OC(C)C(O)C1(O))OC2C(O)C(O)C(OC)OC2(C)		Organooxygen compounds	Carbohydrates and carbohydrate conjugates	1b	960549	dnp:MDP18	6.4754	5.8078	6.2744	5.9525	5.2101	5.083	4.8049	4.4174	5.1841	6.388	1.7414	1.631	1.952	1.7529	1.6501	1.9164	1.7506	1.8558
30	neg_236	Unknown compound		1	neg	236	16.772	329.047	[M-H]-	Unknown																						0.9661	1.0359	1.199	1.1052	0.4087	0.8785	0.9014	0.6701	1.1955	1.2633	0.5051	0.5372	0.4445	0.5625	0.1991	0.6761	0.6163	0.546
31	neg_240	Unknown compound		1	neg	240	6.128	330.083	[M-H]-	Unknown																						0.0236	0.0196	0.0254	0.0303	0.0294	0.026	0.0082	0.0185	0.02	0.022	0.8222	0.7699	0.7124	0.7888	0.8693	0.753	0.8664	0.8235
32	neg_241	Simple ID		1	neg	241	4.749	330.12	[M-H]-	generic	C14H21NO8	Zinolol	6.6592	6.6592	Unknown	3	6	330.12	[M-H]-	331.127	-5.98e-05	3.623	Phenolic glycosides	XDRANPRXTFIDRB-PPTNFGOFNA-N	OC=2C=C(OC1OC(CO)C(O)C(O)C1(O))C(O)=C(C=2)CNC						KNApSAcK=C00032550,ChEBI=CHEBI:66506,NANPDB=NANPDB_3410;NANPDB_3411,UNPD=UNPD105633	0.03	0.0442	0.0381	0.0494	0.0461	0.0337	0.0475	0.0398	0.0485	0.0689	0.9733	0.9304	0.9998	1.0445	1.1181	0.9727	1.1419	1.1255
33	neg_246	Simple ID		1	neg	246	5.221	337.044	[M-H]-	generic	C10H15N2O9P	Imidazoleacetic acid ribotide	5.6686	5.6686	Unknown	3	6	337.044	[M-H]-	338.052	-5.98e-05	3.46	Pentose phosphates	RDQUQBHPMYFYMX-XIWVQZPPSA-N	O=C(O)CC=1N=CN(C=1)C2OC(COP(=O)(O)O)C(O)C2(O)						HMDB=HMDB0006032,ChEBI=CHEBI:16805;CHEBI:57903,FooDB=FDB023810,BMDB=BMDB06032,PubChem=16019958;440341,BLEXP=BLEXPDB00016019958	0.4464	0.3312	0.3743	0.4162	0.3541	0.3971	0.3981	0.2941	0.2566	0.4722	1.0699	1.0714	1.2055	1.1803	1.0107	1.1058	1.0398	1.2052
34	neg_248	Simple ID		1	neg	248	6.975	338.088	[M-H]-	genus	C15H17NO8	6-Hydroxy-1H-indole-3-carboxylic acid; ?-D-Glucopyranosyl ester	7.2253	14.4506	Unknown	3	4	338.088	[M-H]-	339.095	-0.0001599	4.706		VZZSVZUINKFSIE-UHFFFAOYSA-N	O=C(OC1OC(CO)C(O)C(O)C1(O))C3=CNC=2C=C(O)C=CC=23	Arabidopsis thaliana	Indoles and derivatives	Indolecarboxylic acids and derivatives	1a	1010361	dnp:QJK65	0.9328	0.6817	0.3885	0.5416	0.5872	0.518	0.4173	0.2483	0.6064	0.4091	0.5708	0.5475	0.5516	0.5962	0.5998	0.5737	0.5688	0.5211
35	neg_25	Simple ID		1	neg	25	1.384	147.03	[M-H]-	genus	C5H8O5	pyrotartaric acid	4.5208	9.0416	Unknown	3	3	147.03	[M-H]-	148.037	-3.1e-06	3.145		XFTRTWQBIOMVPK-MLHKIVSYNA-N	O=C(O)CC(O)(C(=O)O)C	Arabidopsis thaliana|Citrus|Curcuma|Medicago sativa	Fatty Acyls	Fatty acids and conjugates	1a	153482	knapsack:C00001181|cas:6236-09-5	0.9635	1.1904	1.1288	1.1039	1.2757	0.9471	1.0947	1.1609	1.5046	1.2193	0.1136	0.1267	0.1068	0.1557	0.1295	0.1245	0.1528	0.1616
36	neg_162	Simple ID	Other possible annotated peaks for this cluster.	5	neg	162	3.064	257.078	[2M-H]-	genus	C5H7NO3	3,4-Dihydro-4-hydroxy-2H-pyrrole-2-carboxylic acid	5.3398	10.6796	Unknown	3	5	257.078	[2M-H]-	129.043	0.0003791	3.379		WFOFKRKDDKGRIK-UHFFFAOYSA-N	O=C(O)C1N=CC(O)C1	Arabidopsis thaliana|Homo sapiens	Carboxylic acids and derivatives	Amino acids, peptides, and analogues	1a	40480	dnp:BCS38|chebi:27391|hmdb:HMDB0001369|beilstein registry number:121071|bigg:43511|cas:22573-88-2|chemspider:1030|foodb:FDB022582|kegg compounds:C04281|metacyc:PYRROLINE-HYDROXY-CARBOXYLATE|metlin:6196|pmid:10379660|pubchem cid:1059	0	0	0	0	0	0	0.0054	0.0149	0	0	1.444	1.2963	1.3109	1.2754	2.1181	1.04	1.6795	1.5446
37	neg_257	Simple ID		1	neg	257	5.18	344.04	[M-H]-	genus	C10H12N5O7P	cyclic guanosine monophosphate	6.1853	12.3706	Unknown	3	4	344.04	[M-H]-	345.047	-4.21e-05	4.013		ZOOGRGPOEVQQDX-UUOKFMHZSA-N	O=P3(O)(OCC4OC(N2C=NC=1C(O)=NC(=N)NC=12)C(O)C4(O3))	Arabidopsis thaliana|Brassica napus|Escherichia coli|Glycine max|Homo sapiens|Mus|Theobroma cacao	Purine nucleotides	Cyclic purine nucleotides	1a	36345	chebi:16356|hmdb:HMDB0001314|knapsack:C00019673|plantcyc:CGMP|unpd:UNPD181804|bigg:1485267|bmdb:BMDB01314|cas:51821-84-2|chemspider:22734|drugbank:DB02315|foodb:FDB022549|kegg compounds:C00942|metacyc:CGMP|metlin:6152|pdb:35G|pmid:11491275|pubchem cid:16727415|reaxys registry number:586222|wikipedia:Cyclic GMP|ymdb:YMDB00454	0.3636	0.3628	0.1835	0.6837	0.1286	0.2485	0.5296	0.0933	0.2525	0.2061	0.0582	0.099	0.1024	0.0799	0.1573	0.0733	0.0954	0.0795
38	neg_261	Simple ID	Other possible annotated peaks for this cluster.	2	neg	261	11.501	351.166	[M+FA-H]-	genus	C14H26O7	?-L-Digitoxopyranosyl-(1?4)-D-digitoxose; 3'-Me ether, Me glycoside	3.878	7.756	Unknown	3	4	351.166	[M+FA-H]-	306.168	-0.0002443	2.737		OCYDVUMJBQIZNZ-UHFFFAOYNA-N	OC2CC(OC)OC(C)C2(OC1OC(C)C(O)C(OC)C1)	Cynanchum	Organooxygen compounds	Carbohydrates and carbohydrate conjugates	1b	909318	dnp:ROH95	0.2518	0.2111	0.1667	0.2294	0.2073	0.1732	0.1687	0.1009	0.2377	0.2002	0.0394	0.0484	0.0437	0.0711	0.0722	0.0396	0.0862	0.0295
39	neg_253	Simple ID		16	neg	253	1.432	341.109	[M-H]-	genus	C12H22O11	(2R,3R,4S,5S,6S)-2-{[(2R,3R,4R,5R)-3,4-dihydroxy-2,5-bis(hydroxymethyl)oxolan-2-yl]oxy}-6-(hydroxymethyl)oxane-3,4,5-triol	8.1656	16.3312	Unknown	3	10	341.109	[M-H]-	342.116	0.0003351	4.538		CZMRCDWAGMRECN-PIZGLXSKNA-N	OCC2OC(OC1(OC(CO)C(O)C1(O))(CO))C(O)C(O)C2(O)	Acer saccharum|Ajuga reptans|Aloe vera|Arabidopsis thaliana|Astragalus mongholicus|Beta vulgaris|Brassica oleracea|Caragana microphylla|Cucumis sativus|Curcuma|Derris oblonga|Dipsacus|Fritillaria unibracteata|Gastrodia elata|Genista corsica|Glycine max|Gossypium hirsutum|Helianthus annuus|Isatis|Marsdenia tomentosa|Nicotiana sylvestris|Notopterygium incisum|Paeonia peregrina|Panax ginseng|Petrose…	Organooxygen compounds	Carbohydrates and carbohydrate conjugates	1a	168850	knapsack:C00001151|cas:57-50-1	44.0057	41.0985	32.179	49.7625	42.1032	24.879	50.9205	21.033	62.2302	37.3837	14.7169	10.8187	11.2763	10.5569	11.3574	13.833	12.9818	11.9401
40	neg_266	Simple ID		1	neg	266	5.46	360.072	[M-H]-	genus	C11H16N5O7P	2-Methyladenosine; 5'-Phosphate	5.5585	11.117	Unknown	3	5	360.072	[M-H]-	361.079	-0.000242	3.349		DEYSCYWEHGTTSA-UHFFFAOYSA-N	O=P(O)(O)OCC3OC(N2C=NC1=C(N=C(N=C12)C)N)C(O)C3(O)		Purine nucleotides	Purine ribonucleotides	1b	998722	dnp:HDP43	0.2175	0.1741	0.2198	0.1887	0.1454	0.1713	0.2191	0.1906	0.1145	0.2061	0.6836	0.7223	0.6925	0.8036	0.6534	0.7881	0.638	0.6371
41	neg_195	Simple ID		2	neg	195	14.293	293.05	[M-H2O-H]-	generic	C14H16O6S	Petasiformin A	4.0792	4.0792	Unknown	3	5	293.05	[M-H2O-H]-	312.067	-0.0007819	2.58	Cinnamic acids	AVUZOEYGJPUQDM-VMPITWQZSA-N	O=C(O)C=CC=1C=CC(OS(=O)(=O)O)=C(C=1)CC=C(C)C						KNApSAcK=C00030970,ChEBI=CHEBI:66738,UNPD=UNPD63190	3.5467	3.3283	5.3015	4.0491	0.1293	3.5097	3.5097	3.0187	3.4985	5.7828	1.7126	2.7139	2.2588	2.6776	0.1142	2.9433	2.2541	2.2292
42	neg_254	Simple ID	Other possible annotated peaks for this cluster.	3	neg	254	1.649	341.109	[M-H]-	genus	C12H22O11	(2R,3S,4S,5R,6S)-6-({[(2S,3R,4S,5S,6R)-3,4,5-trihydroxy-6-(hydroxymethyl)oxan-2-yl]oxy}methyl)oxane-2,3,4,5-tetrol	6.9324	13.8648	Unknown	3	7	341.109	[M-H]-	342.116	0.0001351	4.084		DLRVVLDZNNYCBX-QVVOTYHANA-N	OCC2OC(OCC1OC(O)C(O)C(O)C1(O))C(O)C(O)C2(O)	Arabidopsis thaliana|Pyrus	Organooxygen compounds	Carbohydrates and carbohydrate conjugates	1a	133906	knapsack:C00001142|cas:585-99-9	4.06	3.9033	2.766	4.7941	4.3216	3.3765	5.6024	2.5262	5.9245	3.8184	1.3663	0.9892	1.0208	0.9083	1.2051	1.3133	1.4358	1.2246
43	neg_292	Unknown compound		1	neg	292	9.724	390.123	[M-H]-	Unknown																						0.4578	0.2952	0.2965	0.419	0.4619	0.464	0.4708	0.1325	0.599	0.4074	0	0	0	0	0	0	0	0
44	neg_293	Unknown compound		1	neg	293	10.73	398.109	[M-H]-	Unknown																						0	0	0	0	0	0	0	0	0.0046	0	0.6223	0.7239	0.6157	0.7032	0.7474	0.6533	0.7439	0.5519
45	neg_296	Simple ID		1	neg	296	9.269	402.09	[M-H]-	genus	C13H25NO9S2	4-Methylpentyl glucosinolate	5.559	11.118	Unknown	3	5	402.09	[M-H]-	403.097	9.69e-05	3.43		PVFJQLBPPQHTLU-NTEUORMPSA-N	O=S(=O)(O)ON=C(CCCC(C)C)SC1OC(CO)C(O)C(O)C1(O)	Arabidopsis thaliana|Raphanus sativus	Organooxygen compounds	Carbohydrates and carbohydrate conjugates	1a	98837	dnp:LBB42|hmdb:HMDB0038420|knapsack:C00007828|foodb:FDB017778	0.8174	0.8882	0.8655	0.7489	0.9121	1.0978	0.8295	1.2704	0.5221	0.5996	1.1029	1.094	0.9513	1.2579	1.0567	1.1141	1.2574	0.9905
46	neg_298	Unknown compound		2	neg	298	1.266	404.104	[M-H]-	Unknown																						2.0299	1.7882	1.9237	2.2904	1.4263	1.5242	1.579	1.4261	1.9917	1.7795	0.6643	0.6702	0.6687	0.6881	0.7242	0.7108	0.7732	0.7912
47	neg_301	Simple ID		1	neg	301	10.432	415.198	[M-H]-	generic	C20H32O9	6-Acetoxy-7-hydroxymyrcene-7-O-beta-D-glucopyranoside-2'-O-acetate	4.4704	4.4704	Unknown	3	1	415.197	[M-H]-	416.205	-0.0001438	2.365	Fatty acyl glycosides of mono- and disaccharides	GTTUNXIKMRJZGS-RNXGYQRANA-N	O=C(OC1C(OC(CO)C(O)C1(O))OC(C)(C)C(OC(=O)C)CCC(=C)C=C)C						KNApSAcK=C00021084,UNPD=UNPD92208	0.0804	0.0561	0.0477	0.0856	0.0604	0.0576	0.0644	0.04	0.1008	0.0785	0.7307	0.9079	0.9653	1.0718	0.9563	0.8547	0.9077	0.8528
48	neg_302	Unknown compound		1	neg	302	10.523	416.106	[M-H]-	Unknown																						0.6631	0.6668	0.6579	0.5722	0.7946	0.8619	0.7529	0.8997	0.4621	0.4775	1.3215	1.2076	1.1513	1.3388	1.3347	1.3839	1.5112	1.3528
49	neg_182	Simple ID	Other possible annotated peaks for this cluster.	3	neg	182	7.548	285.062	[M-H]-	genus	C12H14O8	2-hydroxy-3-{[(2S,3R,4S,5R)-3,4,5-trihydroxyoxan-2-yl]oxy}benzoic acid	7.1289	14.2578	Unknown	3	4	285.062	[M-H]-	286.069	-0.000309	4.355		LRLNKLFTNOIZNI-LYXBDTNHSA-N	O=C(O)C=2C=CC=C(OC1OCC(O)C(O)C1(O))C=2(O)	Arabidopsis thaliana	Organooxygen compounds	Carbohydrates and carbohydrate conjugates	1a	17680	chebi:91166|pmid:25457500	9.0063	7.9118	7.4349	7.8282	8.1223	7.4371	6.025	5.3622	9.2201	6.5158	1.1233	1.2233	1.1028	1.2586	1.4237	1.2442	1.105	1.3216
50	neg_306	Simple ID		1	neg	306	2.376	422.026	[M-H]-	genus	C11H21NO10S3	[(Z)-{4-[(R)-methanesulfinyl]-1-{[(2R,3R,4R,5R,6S)-3,4,5-trihydroxy-6-(hydroxymethyl)oxan-2-yl]sulfanyl}butylidene}amino]oxysulfonic acid	5.5914	11.1828	Unknown	3	6	422.026	[M-H]-	423.033	-0.0001176	3.385		PHYYADMVYQURSX-GHXNOFRVNA-N	O=S(C)CCCC(=NOS(=O)(=O)O)SC1OC(CO)C(O)C(O)C1(O)	Aethionema armenum|Alyssum constellatum|Alyssum peltarioides|Alyssum sibiricum|Anastatica hierochuntica|Arabidopsis thaliana|Armoracia|Aurinia saxatilis|Brassica napus|Brassica oleracea|Brassica rapa|Cakile edentula|Cakile maritima|Calepina irregularis|Capparis spinosa|Chorispora tenella|Erucastrum strigosum|Erysimum asperum|Erysimum capitatum|Erysimum cuspidatum|Erysimum diffusum|Erysimum linifo…	Organooxygen compounds	Carbohydrates and carbohydrate conjugates	1a	178094	knapsack:C00007343|cas:27303-31-7	9.4009	11.1299	7.3246	8.8519	13.1221	10.7621	8.2172	11.6139	8.3592	7.1935	0.429	0.4396	0.3125	0.3591	0.4985	0.3913	0.3969	0.3629
51	neg_307	Simple ID		1	neg	307	1.469	422.026	[M-H]-	genus	C11H21NO10S3	[(Z)-{4-[(R)-methanesulfinyl]-1-{[(2R,3R,4R,5R,6S)-3,4,5-trihydroxy-6-(hydroxymethyl)oxan-2-yl]sulfanyl}butylidene}amino]oxysulfonic acid	6.3711	12.7422	Unknown	3	6	422.026	[M-H]-	423.033	-0.0002176	3.802		PHYYADMVYQURSX-GHXNOFRVNA-N	O=S(C)CCCC(=NOS(=O)(=O)O)SC1OC(CO)C(O)C(O)C1(O)	Aethionema armenum|Alyssum constellatum|Alyssum peltarioides|Alyssum sibiricum|Anastatica hierochuntica|Arabidopsis thaliana|Armoracia|Aurinia saxatilis|Brassica napus|Brassica oleracea|Brassica rapa|Cakile edentula|Cakile maritima|Calepina irregularis|Capparis spinosa|Chorispora tenella|Erucastrum strigosum|Erysimum asperum|Erysimum capitatum|Erysimum cuspidatum|Erysimum diffusum|Erysimum linifo…	Organooxygen compounds	Carbohydrates and carbohydrate conjugates	1a	178094	knapsack:C00007343|cas:27303-31-7	4.2055	4.823	3.0012	3.85	4.409	3.9522	2.9193	3.8514	3.1082	2.8581	0.1707	0.156	0.1307	0.1285	0.1758	0.1372	0.1466	0.1279
52	neg_286	Simple ID	Other possible annotated peaks for this cluster.	2	neg	286	8.272	385.114	[M-H]-	genus	C17H22O10	1-O-sinapoyl-?-D-glucose	6.3919	12.7838	Unknown	3	8	385.114	[M-H]-	386.121	-0.0003795	3.779		XRKBRPFTFKKHEF-DXXRHYKQNA-N	O=C(OC1OC(CO)C(O)C(O)C1(O))C=CC=2C=C(OC)C(O)=C(OC)C=2	Arabidopsis thaliana	Cinnamic acids and derivatives	Hydroxycinnamic acids and derivatives	1a	197756	knapsack:C00013592|cas:14364-09-1	0.3864	0.4144	0.2702	0.3369	0.397	0.3649	0.278	0.2735	0.3925	0.4418	1.8987	1.7694	2.1979	2.0996	1.5811	2.1767	1.8462	1.8258
53	neg_315	Unknown compound		1	neg	315	9.649	431.192	[M-H]-	Unknown																						2.1712	1.694	1.9527	2.4786	1.855	1.6209	1.9402	0.9158	2.4736	2.1189	2.3222	2.3463	3.2297	3.4766	2.4121	2.7867	2.4877	3.1486
54	neg_316	Unknown compound		1	neg	316	9.392	431.192	[M-H]-	Unknown																						0.443	0.4782	0.3995	0.5064	0.4817	0.4615	0.4633	0.2837	0.4705	0.5158	0.6961	0.6142	0.782	0.8768	0.6853	0.7973	0.625	0.8256
55	neg_308	Simple ID	Other possible annotated peaks for this cluster.	3	neg	308	8.605	422.059	[M-H]-	genus	C15H21NO9S2	[(Z)-(3-phenyl-1-{[(2S,3R,4R,5S,6R)-3,4,5-trihydroxy-6-(hydroxymethyl)oxan-2-yl]sulfanyl}propylidene)amino]oxysulfonic acid	6.2052	12.4104	Unknown	3	5	422.059	[M-H]-	423.066	-0.0002032	3.79		CKIJIGYDFNXSET-WJDWOHSUNA-N	O=S(=O)(O)ON=C(CCC1=CC=CC=C1)SC2OC(CO)C(O)C(O)C2(O)	Alyssum tortuosum|Arabidopsis thaliana|Arabis|Armoracia|Barbarea intermedia|Barbarea orthoceras|Barbarea stricta|Barbarea verna|Barbarea vulgaris|Biscutella didyma|Biscutella laevigata|Brassica juncea|Brassica nigra|Brassica oleracea|Brassica rapa|Cakile edentula|Cakile lanceolata|Capsella|Cardamine flexuosa|Cardamine hirsuta|Diplotaxis erucoides|Diplotaxis virgata|Erucastrum|Farsetia|Hesperis ma…			1a	157645	knapsack:C00007350|cas:499-30-9	0.7307	0.8324	0.7013	0.6724	0.9336	0.8746	0.6085	1.0522	0.6238	0.5739	0.262	0.2369	0.1947	0.2473	0.2405	0.2964	0.2837	0.2329
56	neg_320	Simple ID		1	neg	320	3.429	436.041	[M-H]-	genus	C12H23NO10S3	[(Z)-{5-[(S)-methanesulfinyl]-1-{[(2S,3R,4S,5S,6R)-3,4,5-trihydroxy-6-(hydroxymethyl)oxan-2-yl]sulfanyl}pentylidene}amino]oxysulfonic acid	5.1037	10.2074	Unknown	3	6	436.041	[M-H]-	437.048	0.0003325	2.683		GMMLNKINDDUDCF-BYNGITTOSA-N	O=S(C)CCCCC(=NOS(=O)(=O)O)SC1OC(CO)C(O)C(O)C1(O)	Arabidopsis thaliana|Brassica oleracea	Organooxygen compounds	Carbohydrates and carbohydrate conjugates	1a	9661	chebi:79311|hmdb:HMDB0038404|knapsack:C00007545|cas:21414-41-5|kegg compounds:C08419|pmid:23110644|reaxys registry number:8167699|wikipedia:Glucoraphanin	19.7193	22.8281	16.8018	17.9933	30.3092	27.3339	22.2896	30.9231	16.2703	16.507	1.6843	1.4771	1.4119	1.4842	1.7586	1.8819	1.8359	1.7678
57	neg_321	Simple ID		1	neg	321	3.882	436.041	[M-H]-	genus	C12H23NO10S3	[(Z)-{5-[(S)-methanesulfinyl]-1-{[(2S,3R,4S,5S,6R)-3,4,5-trihydroxy-6-(hydroxymethyl)oxan-2-yl]sulfanyl}pentylidene}amino]oxysulfonic acid	5.4324	10.8648	Unknown	3	7	436.041	[M-H]-	437.048	0.0002325	2.96		GMMLNKINDDUDCF-BYNGITTOSA-N	O=S(C)CCCCC(=NOS(=O)(=O)O)SC1OC(CO)C(O)C(O)C1(O)	Arabidopsis thaliana|Brassica oleracea	Organooxygen compounds	Carbohydrates and carbohydrate conjugates	1a	9661	chebi:79311|hmdb:HMDB0038404|knapsack:C00007545|cas:21414-41-5|kegg compounds:C08419|pmid:23110644|reaxys registry number:8167699|wikipedia:Glucoraphanin	65.4245	72.0089	49.9275	54.9411	91.0819	80.7974	63.4653	96.5343	47.4478	49.3137	4.7899	4.4159	3.9819	4.1322	5.0574	5.0845	4.6985	4.9955
58	neg_328	Unknown compound		1	neg	328	12.907	444.137	[M-H]-	Unknown																						0.0258	0.0364	0	0	0.0165	0.0106	0.0109	0.0154	0.0156	0	0.726	0.7948	0.7532	0.9907	0.7899	1.0335	0.6872	1.1914
59	neg_331	Unknown compound		1	neg	331	16.774	447.134	[M-H]-	Unknown																						2.9536	2.4752	3.4091	3.4822	5.1513	2.2073	2.7209	2.1843	4.3166	3.295	2.512	1.9635	2.17	1.9281	3.8829	2.0387	2.0232	1.9746
60	neg_333	Simple ID		1	neg	333	9.681	448.077	[M-H]-	genus	C14H27NO9S3	(E)-[7-(methylsulfanyl)-1-{[(2S,3R,4S,5S,6R)-3,4,5-trihydroxy-6-(hydroxymethyl)oxan-2-yl]sulfanyl}heptylidene]amino sulfate	6.4703	12.9406	Unknown	3	6	448.077	[M-H]-	449.085	1.8e-05	3.768		ZAKICGFSIJSCSF-BXLHIMNRSA-M	O=S(=O)([O-])ON=C(CCCCCCSC)SC1OC(CO)C(O)C(O)C1(O)	Arabidopsis halleri|Arabidopsis lyrata|Arabidopsis thaliana|Boechera stricta|Brassica rapa|Carica papaya|Eutrema salsugineum	Organooxygen compounds	Carbohydrates and carbohydrate conjugates	1a	250416	plantcyc:CPDQT-420|pubchem cid:44237118	0.2627	0.488	0.2943	0.3374	0.2984	0.507	0.2864	0.585	0.1637	0.086	1.0872	1.2045	0.9559	1.0126	1.1031	1.1331	1.0285	1.2158
61	neg_334	Simple ID		1	neg	334	5.437	450.057	[M-H]-	genus	C13H25NO10S3	(2R,3S,4S,5R,6S)-2-(hydroxymethyl)-6-{[(1E)-6-[(S)-methanesulfinyl]-1-[(sulfonatooxy)imino]hexyl]sulfanyl}oxane-3,4,5-triol	6.0725	12.145	Unknown	3	6	450.057	[M-H]-	451.064	8.25e-05	3.669		HUCGRJSHMZWRQQ-LPXZBHKBSA-M	O=S(C)CCCCCC(=NOS(=O)(=O)[O-])SC1OC(CO)C(O)C(O)C1(O)	Arabidopsis halleri|Arabidopsis thaliana|Boechera stricta|Capsella rubella|Eutrema salsugineum	Organooxygen compounds	Carbohydrates and carbohydrate conjugates	1a	251101	chebi:5395|knapsack:C00007345|plantcyc:CPDQT-284|pubchem cid:44237260	5.7974	6.4899	3.9441	5.5126	7.4769	6.5027	5.3597	6.4721	5.8662	4.69	1.4818	1.2158	1.2377	1.3323	1.5124	1.6814	1.4785	1.6481
62	neg_34	Simple ID		1	neg	34	1.334	157.036	[M-H]-	genus	C4H6N4O3	Allantoin|Allantoin; (R)-form|Allantoin; (S)-form|Allantoin; (?)-form	5.5179	11.0358	Unknown	3	6	157.036	[M-H]-	158.044	0.0003136	3.855		POJWUDADGALRAB-UHFFFAOYSA-N	N=C(O)NC1N=C(O)N=C1(O)	Allophylus edulis|Arabidopsis thaliana|Brassica napus|Coffea|Cymbastela cantharella|Escherichia coli|Glycine max|Homo sapiens|Mus|Oryza sativa|Platanus orientalis|Pyrostegia venusta|Rattus norvegicus|Saccharomyces cerevisiae|Salmonella enterica|Strychnos cathayensis|Sus scrofa|Tedania|Theobroma cacao	Azoles	Imidazoles	1a	23830	dnp:BGS72|chebi:15676|hmdb:HMDB0000462|knapsack:C00007468|cas:97-59-6|chemspider:199|drug central:4268|foodb:FDB001613|kegg compounds:C01551|kegg drug:D00121|lincs:LSM-5190|metacyc:ALLANTOIN|metlin:89|patent:US2158098|pmid:11157020|pubchem cid:204|reaxys registry number:83514|wikipedia:Allantoin	0.1571	0.1372	0.13	0.1024	0.1964	0.123	0.1278	0.1033	0.2189	0.1969	2.3206	2.7644	3.1806	3.0361	2.5411	2.8569	2.7187	3.0318
63	neg_340	Simple ID		1	neg	340	10.793	462.093	[M-H]-	genus	C15H29NO9S3	(E)-[8-(methylsulfanyl)-1-{[(2S,3R,4S,5S,6R)-3,4,5-trihydroxy-6-(hydroxymethyl)oxan-2-yl]sulfanyl}octylidene]amino sulfate	5.7588	11.5176	Unknown	3	6	462.093	[M-H]-	463.1	-0.0001319	3.559		SJHVRBSHKTUXLG-MFIRQCQASA-M	O=S(=O)([O-])ON=C(CCCCCCCSC)SC1OC(CO)C(O)C(O)C1(O)	Arabidopsis thaliana|Boechera stricta|Capsella grandiflora|Capsella rubella|Carica papaya	Organooxygen compounds	Carbohydrates and carbohydrate conjugates	1a	251137	knapsack:C00007353|plantcyc:CPDQT-296|pubchem cid:44237368	1.6511	3.2351	1.9343	2.6774	2.3487	3.6688	2.1588	3.6509	1.4554	0.7552	8.4116	9.5723	8.0693	8.1589	9.6898	9.3314	7.1918	11.3773
64	neg_342	Simple ID		1	neg	342	6.523	464.073	[M-H]-	genus	C14H27NO10S3	({7-[(S)-methanesulfinyl]-1-{[(2S,3R,4S,5S,6R)-3,4,5-trihydroxy-6-(hydroxymethyl)oxan-2-yl]sulfanyl}heptylidene}amino)oxysulfonic acid	5.3526	10.7052	Unknown	3	5	464.073	[M-H]-	465.08	-0.0003674	3.095		OOGAQHVYHLPICD-DNDZILKHSA-N	O=S(C)CCCCCCC(=NOS(=O)(=O)O)SC1OC(CO)C(O)C(O)C1(O)	Arabidopsis thaliana|Hesperis matronalis			1a	21272	chebi:136956|hmdb:HMDB0038410|knapsack:C00007348|agricola:IND44562811|cas:33049-17-1|metacyc:CPDQT-288|pmid:19334740|reaxys registry number:8948953	0.9172	0.8377	0.7094	0.6381	1.0941	0.9964	0.678	1.1262	0.6977	0.5699	0.846	0.6714	0.7031	0.7112	0.8388	0.7238	0.8042	0.9107
65	neg_347	Simple ID		1	neg	347	8.873	477.065	[M-H]-	genus	C17H22N2O10S2	(E)-[2-(4-methoxy-1H-indol-3-yl)-1-{[(2S,3R,4S,5S,6R)-3,4,5-trihydroxy-6-(hydroxymethyl)oxan-2-yl]sulfanyl}ethylidene]amino sulfate	5.722	11.444	Unknown	3	4	477.065	[M-H]-	478.072	-0.0004895	3.724		IIAGSABLXRZUSE-OXESJPRGSA-M	O=S(=O)([O-])ON=C(CC2=CNC=1C=CC=C(OC)C=12)SC3OC(CO)C(O)C(O)C3(O)	Arabidopsis halleri|Brassica rapa	Organooxygen compounds	Carbohydrates and carbohydrate conjugates	1a	251117	chebi:62725|knapsack:C00000128|plantcyc:4-METHOXY-3-INDOLYLMETHYL-GLUCOSINOLATE|kegg ligand:C08423|pubchem cid:9548646	20.0593	21.4466	16.0577	20.5902	18.9612	19.7888	16.8234	15.3352	15.1523	14.1028	12.5999	11.7195	12.3475	11.7139	12.5139	13.4387	12.5376	11.4921
66	neg_349	Simple ID		1	neg	349	7.317	478.089	[M-H]-	genus	C15H29NO10S3	7-(Methylthio)heptyl glucosinolate; S-Oxide	5.9041	11.8082	Unknown	3	9	478.089	[M-H]-	479.095	-0.0005173	3.375		LQZALQLZOQQFGM-LFIBNONCSA-N	O=S(C)CCCCCCCC(=NOS(=O)(=O)O)SC1OC(CO)C(O)C(O)C1(O)	Arabidopsis thaliana|Sibara	Organooxygen compounds	Carbohydrates and carbohydrate conjugates	1a	1048840	dnp:KZZ81	5.0454	4.8705	3.7068	4.0513	6.2391	5.6374	4.1466	6.1768	3.6341	3.2478	3.928	3.5901	3.6613	4.0519	4.1625	3.7021	3.8256	5.0815
67	neg_352	Simple ID		1	neg	352	11.841	487.126	[M-H]-	family	C24H24O11	7-C-Glucosyl-2',3',5,6-tetrahydroxyisoflavone; 2',3'-Methylene, 5,6-di-Me ether	5.4047	8.10705	Unknown	3	7	487.126	[M-H]-	488.132	-0.0010149	3.408		VUZRPXRSOYFRRN-UHFFFAOYNA-N	O=C1C(=COC=2C=C(C(OC)=C(OC)C1=2)C3OC(CO)C(O)C(O)C3(O))C=5C=CC=C4OCOC4=5	Lepidium sativum	Isoflavonoids	Isoflavonoid C-glycosides	1a	1079020	dnp:ROH93	0.7044	0.6631	0.8632	1.1529	0.8511	0.8006	0.7585	0.5795	1.1734	0.964	0.0257	0.0395	0.05	0.0483	0.0384	0.0489	0.0549	0.0462
68	neg_356	Simple ID		1	neg	356	10.448	494.08	[M-H]-	genus	C18H25NO11S2	4-Hydroxybutyl glucosinolate; 4-Benzoyl	5.3215	10.643	Unknown	3	6	494.08	[M-H]-	495.087	-0.0005738	3.117		IEVWTBIZULGLHA-CPNJWEJPSA-N	O=C(OCCCCC(=NOS(=O)(=O)O)SC1OC(CO)C(O)C(O)C1(O))C2=CC=CC=C2	Arabidopsis thaliana	Organooxygen compounds	Carbohydrates and carbohydrate conjugates	1a	957006	dnp:LBB46	0	0	0	0	0	0	0	0	0	0	1.1071	0.9827	0.7153	0.9989	1.1329	0.9503	1.1882	0.958
69	neg_358	Unknown compound		1	neg	358	4.074	500.103	[M-H]-	Unknown																						0.3991	0.6181	0.2239	0.3893	1.2321	1.044	0.4289	0.5526	0.7462	0.5318	0.2796	0.2517	0.2479	0.3174	0.221	0.3588	0.3072	0.3201
70	neg_330	Simple ID		2	neg	330	8.074	447.054	[M-H]-	genus	C16H20N2O9S2	[(Z)-[2-(1H-indol-3-yl)-1-{[(2S,3R,4S,5R,6R)-3,4,5-trihydroxy-6-(hydroxymethyl)oxan-2-yl]sulfanyl}ethylidene]amino]oxysulfonic acid	5.3442	10.6884	Unknown	3	5	447.054	[M-H]-	448.061	0.0001458	3.309		DNDNWOWHUWNBCK-BDBHUYAFNA-N	O=S(=O)(O)ON=C(CC2=CNC1=CC=CC=C12)SC3OC(CO)C(O)C(O)C3(O)	Arabidopsis thaliana|Armoracia|Barbarea vulgaris|Batis maritima|Brassica juncea|Brassica napus|Brassica oleracea|Brassica rapa|Capparis spinosa|Cleome anomala|Cleome monophylla|Conringia orientalis|Diplotaxis erucoides|Isatis tinctoria|Lepidium graminifolium|Lepidium montanum|Lepidium sativum|Moricandia arvensis|Raphanus sativus|Reseda alba|Reseda complicata|Reseda crystallina|Reseda lutea|Reseda…	Organooxygen compounds	Carbohydrates and carbohydrate conjugates	1a	188087	knapsack:C00000125|cas:4356-52-9	27.9891	40.1047	23.566	40.2478	53.4456	45.8254	38.3479	39.3869	43.5743	37.1554	4.0113	3.028	3.2231	3.7486	3.8298	5.1401	3.9695	3.985
71	neg_365	Simple ID		1	neg	365	1.173	517.141	[M-H]-	generic	C18H30O17	6-{[3,4-dihydroxy-5-(hydroxymethyl)-5-{[3,4,5-trihydroxy-6-(hydroxymethyl)oxan-2-yl]oxy}oxolan-2-yl]methoxy}-3,4,5-trihydroxyoxane-2-carboxylic acid	6.7118	6.7118	Unknown	3	11	517.141	[M-H]-	518.148	0.000323	3.743	Oligosaccharides	LOXAPMUCZSANPA-UHFFFAOYNA-N	O=C(O)C3OC(OCC2OC(OC1OC(CO)C(O)C(O)C1(O))(CO)C(O)C2(O))C(O)C(O)C3(O)						HMDB=HMDB0125624	1.6137	0.9909	1.441	0.9049	1.1832	0.941	0.8	0.5889	1.325	1.6783	1.1794	1.4407	1.3701	1.5482	1.374	1.6621	1.2501	1.5437
72	neg_372	Simple ID		1	neg	372	16.62	531.281	[M-H]-	generic	C26H44O11	Multifidoside C;(-)-Multifidoside C	6.0982	6.0982	Unknown	3	4	531.281	[M-H]-	532.288	-0.0003142	3.547	Terpene glycosides	SRVFVAOWBRZFDZ-HAUGHONRNA-N	OC4COC(OCC3OC(OC1CC2(C)(C(O)CCC(=C)C2(CC1C(C)C)))C(O)C(O)C3(O))C(O)C4(O)						KNApSAcK=C00039800,UNPD=UNPD136083	0.9231	0.4415	1.2423	0.2666	0.3718	0.3242	0.3991	0.3078	2.8324	2.2141	0.2228	0.1996	0.2274	0.1416	0.2086	0.1813	0.1798	0.1702
73	neg_21	Simple ID	Other possible annotated peaks for this cluster.	13	neg	21	1.171	145.062	[M-H]-	genus	C5H10N2O3	Glutamine|Glutamine; (R)-form|Glutamine; (S)-form|Glutamine; (?)-form	7.205	14.41	Unknown	3	1	145.062	[M-H]-	146.069	6.57e-05	4.19		ZDXPYRJPNDTMRX-UHFFFAOYSA-N	O=C(O)C(N)CCC(=N)O	Arabidopsis thaliana|Astragalus mongholicus|Daphnia|Homo sapiens|Oryza sativa|Populus deltoides|Schizosaccharomyces pombe	Carboxylic acids and derivatives	Amino acids, peptides, and analogues	1a	33178	dnp:HCL78|knapsack:C00001359|beilstein registry number:1723795|cas:585-21-7|gmelin registry number:27318|reaxys registry number:1723795|wikipedia:Glutamine	140.197	125.179	133.933	112.307	95.0926	81.0291	137.301	130.072	90.9896	104.305	383.021	363.948	371.609	360.513	391.349	343.376	367.707	333.314
74	neg_398	Simple ID	Other possible annotated peaks for this cluster.	4	neg	398	9.715	609.146	[M-H]-	genus	C27H30O16	2-(3,4-dihydroxyphenyl)-5-hydroxy-7-{[(2R,3R,4S,5S,6R)-3,4,5-trihydroxy-6-(hydroxymethyl)oxan-2-yl]oxy}-3-{[(2R,3R,4R,5R,6S)-3,4,5-trihydroxy-6-methyloxan-2-yl]oxy}chromen-4-one	5.9571	11.9142	Unknown	3	6	609.146	[M-H]-	610.153	8.4e-06	3.775		MCTZMXCUYPDYNE-KUKMIBIMSA-N	O=C3C(OC1OC(C)C(O)C(O)C1(O))=C(OC4=CC(OC2OC(CO)C(O)C(O)C2(O))=CC(O)=C34)C=5C=CC(O)=C(O)C=5	Arabidopsis halleri|Capsella rubella|Catharanthus roseus	Flavonoids	Flavonoid glycosides	1a	250484	plantcyc:CPD-8011|pubchem cid:25245356	0.0244	0.0175	0.0066	0.0257	0.0212	0.0173	0.0101	0.0145	0.01	0.0238	0.0442	0.045	0.0377	0.0523	0.0565	0.0696	0.0309	0.0272
75	neg_355	Simple ID		3	neg	355	8.115	492.104	[M-H]-	genus	C16H31NO10S3	(2R,3S,4S,5R,6S)-2-(hydroxymethyl)-6-{[(1E)-9-[(S)-methanesulfinyl]-1-[(sulfonatooxy)imino]nonyl]sulfanyl}oxane-3,4,5-triol	5.2307	10.4614	Unknown	3	7	492.104	[M-H]-	493.111	-0.0002673	3.024		GPMDJOOLATZDQL-SGBLMZTFSA-M	O=S(C)CCCCCCCCC(=NOS(=O)(=O)[O-])SC1OC(CO)C(O)C(O)C1(O)	Arabidopsis halleri|Arabidopsis thaliana|Capsella grandiflora|Capsella rubella|Carica papaya	Organooxygen compounds	Carbohydrates and carbohydrate conjugates	1a	251818	knapsack:C00007355|plantcyc:CPDQT-299|pubchem cid:44237257	42.7105	48.1719	35.7477	21.4988	49.9791	55.224	40.1539	55.7583	23.107	28.583	27.3762	24.708	27.419	30.2173	36.7831	31.9584	30.5711	43.3961
76	neg_386	Simple ID		1	neg	386	14.819	573.292	[M-H]-	family	C28H46O12	7(14)-Bisabolene-1,2,3,4,5,8,9,10,11-nonol; 2-Angeloyl, 5,8-bis(2-methylpropanoyl)	3.4835	5.22525	Unknown	3	4	573.292	[M-H]-	574.299	-0.0002495	2.406		NLZYENVQYIBSLP-SDNWHVSQSA-N	O=C(OC1C(O)C(C(=C)C(OC(=O)C(C)C)C(O)C(O)C(O)(C)C)C(OC(=O)C(C)C)C(O)C1(O)(C))C(=CC)C	Cremanthodium ellisii	Prenol lipids	Sesquiterpenoids	1b	985701	dnp:CRV94	1.0443	0.5036	0.6117	0.3137	0.1894	0.2437	0.1598	0.0893	0.6386	0.553	0.0244	0.0312	0.0422	0.0632	0.0787	0.0092	0.0652	0.0374
77	neg_390	Simple ID		1	neg	390	11.525	591.172	[M-H]-	genus	C28H32O14	1,2-di-O-sinapoyl-?-D-glucose	4.4944	8.9888	Unknown	3	7	591.172	[M-H]-	592.179	-0.0001707	3.127		KQDOTXAUJBODDM-STUNQXDBSA-N	O=C(OC2OC(CO)C(O)C(O)C2(OC(=O)C=CC1=CC(OC)=C(O)C(OC)=C1))C=CC=3C=C(OC)C(O)=C(OC)C=3	Arabidopsis thaliana|Boechera stricta|Capsella grandiflora|Eutrema salsugineum	Cinnamic acids and derivatives	Hydroxycinnamic acids and derivatives	1a	14948	chebi:27993|plantcyc:12-BIS-O-SINAPOYL-BETA-D-GLUCOSIDE|unpd:UNPD53584|chemspider:4444262|kegg ligand:C04275|pubchem cid:5280665|reaxys registry number:6993672	1.9387	1.8742	1.3589	0.9868	3.4188	2.7585	2.1404	2.4981	1.4235	2.4769	0.6584	0.7408	0.3776	0.3862	0.623	0.881	0.6869	0.0397
78	neg_391	Simple ID		1	neg	391	12.195	591.172	[M-H]-	genus	C28H32O14	1,2-di-O-sinapoyl-?-D-glucose	5.4251	10.8502	Unknown	3	7	591.172	[M-H]-	592.179	-0.0002707	3.756		KQDOTXAUJBODDM-STUNQXDBSA-N	O=C(OC2OC(CO)C(O)C(O)C2(OC(=O)C=CC1=CC(OC)=C(O)C(OC)=C1))C=CC=3C=C(OC)C(O)=C(OC)C=3	Arabidopsis thaliana|Boechera stricta|Capsella grandiflora|Eutrema salsugineum	Cinnamic acids and derivatives	Hydroxycinnamic acids and derivatives	1a	14948	chebi:27993|plantcyc:12-BIS-O-SINAPOYL-BETA-D-GLUCOSIDE|unpd:UNPD53584|chemspider:4444262|kegg ligand:C04275|pubchem cid:5280665|reaxys registry number:6993672	0.6406	0.643	0.8104	0.3398	1.2287	1.4017	1.0044	1.4794	0.5916	0.787	0.1562	0.2056	0.0768	0.0853	0.1643	0.1949	0.1668	0
79	neg_346	Simple ID		4	neg	346	11.884	476.109	[M-H]-	genus	C16H31NO9S3	[(Z)-[9-(methylsulfanyl)-1-{[(2R,3S,4S,5R,6S)-3,4,5-trihydroxy-6-(hydroxymethyl)oxan-2-yl]sulfanyl}nonylidene]amino]oxysulfonic acid	4.3484	8.6968	Unknown	3	5	476.109	[M-H]-	477.116	-0.0001819	3.054		CWOJBEDMJKZKAB-ATVHPVEENA-N	O=S(=O)(O)ON=C(CCCCCCCCSC)SC1OC(CO)C(O)C(O)C1(O)	Arabidopsis thaliana|Arabis amplexicaulis|Arabis hirsuta|Arabis stelleri|Boechera holboellii|Crucihimalaya wallichii|Nasturtium officinale|Rorippa indica|Rorippa sylvestris|Sibara	Organooxygen compounds	Carbohydrates and carbohydrate conjugates	1a	197336	chebi:80989|knapsack:C00007356|plantcyc:CPDQT-300|unpd:UNPD58616|cas:80667-68-1|foodb:FDB030633|pubchem cid:44237373	7.787	14.2054	7.4489	10.1161	8.4706	13.9909	10.3722	14.6268	5.5296	3.7593	58.0127	64.3925	56.5677	61.9458	56.0849	63.1041	51.3467	76.9173
80	neg_395	Unknown compound		1	neg	395	12.953	606.123	[M-H]-	Unknown																						0.5774	0.3591	0.2233	0.2915	0.9338	0.4923	0.2497	0.1232	0.7373	0.5746	0.0906	0.0809	0.0806	0.1281	0.0881	0.1145	0.0833	0.0924
81	neg_4	Simple ID		1	neg	4	3.731	117.019	[M-H]-	Standard	C4H6O4	succinate	5.681	11.362	(IROA) METHYLMALONATE	3	4	117.019	[M-H]-	118.027	0.0003322	3.448		KDYFGRWQOYBRFD-UHFFFAOYSA-L	O=C([O-])CCC(=O)[O-]	Amborella trichopoda|Anacardium occidentale|Ananas comosus|Aquilegia coerulea|Arabidopsis halleri|Asparagus officinalis|Brassica rapa|Calotropis gigantea|Camptotheca acuminata|Capsella rubella|Capsicum annuum|Carica papaya|Catharanthus roseus|Citrus|Coccomyxa|Corchorus capsularis|Cucumis sativus|Daucus carota|Dioscorea|Eutrema salsugineum|Glycine max|Helianthus annuus|Homo sapiens|Kalanchoe laxif…	Carboxylic acids and derivatives	Dicarboxylic acids and derivatives	1a	13610	chebi:30031|hmdb:HMDB00254|knapsack:C00001205|plantcyc:SUC|swisslipids:SLM:000000892|beilstein registry number:1863859|bigg:succ|cas:110-15-6|chemspider:140973|gmelin registry number:240255|kegg ligand:C00042|metabolights:MTBLC30031|metacyc:SUC|pmid:10744784|pubchem cid:160419|reaxys registry number:1863859|refmet:Succinic acid	1.5765	1.5609	2.4326	2.1271	2.0777	2.2818	1.6849	2.1697	2.2113	1.7443	0.3203	0.3766	0.3781	0.3459	0.3041	0.4752	0.4157	0.4492
82	neg_404	Unknown compound		1	neg	404	13.287	636.133	[M-H]-	Unknown																						0.1633	0.1339	0.065	0.0557	0.3658	0.1463	0.0411	0	0	0.0116	0.5692	0.6815	0.6976	1.0217	0.447	0.6611	0.5385	0.503
83	neg_406	Simple ID		1	neg	406	4.768	662.102	[M-H]-	genus	C21H27N7O14P2	1-[(2R,3S,4R,5R)-5-{[({[(2R,3S,4S,5R)-5-(6-aminopurin-9-yl)-3,4-dihydroxyoxolan-2-yl]methyl phosphonato}oxy(hydroxy)phosphoryl)oxy]methyl}-3,4-dihydroxyoxolan-2-yl]-3-(C-hydroxycarbonimidoyl)-1??-pyridin-1-ylium	5.384	10.768	Unknown	3	4	662.102	[M-H]-	663.109	-0.0003546	3.245		BAWFJGJZGIEFAR-WJWPZZAENA-N	O=P([O-])(OCC3OC(N2C=NC1=C(N=CN=C12)N)C(O)C3(O))OP(=O)(O)OCC5OC([N+]4=CC=CC(=C4)C(=N)O)C(O)C5(O)	Arabidopsis thaliana|Escherichia coli	(5'->5')-dinucleotides		1a	131494	knapsack:C00007256|cas:53-84-9	2.3366	2.5484	2.5466	2.9973	2.474	2.2936	2.8425	2.0506	2.258	2.1987	1.7999	1.5011	1.6602	1.621	1.4956	1.6829	1.8733	1.8376
84	neg_16	Simple ID		3	neg	16	10.338	133.014	[M-H]-	genus	C4H6O5	Malic acid|Malic acid; (R)-form|Malic acid; (S)-form|Malic acid; (?)-form|Malic acid; (?)-form	4.2231	8.4462	Unknown	3	3	133.014	[M-H]-	134.022	0.0002468	3.106		BJEPYKJPYRNKOW-UHFFFAOYSA-N	O=C(O)CC(O)C(=O)O	Arabidopsis thaliana|Brassica napus|Cucumaria georgiana|Daphnia|Glycine max|Hibiscus sabdariffa|Homo sapiens|Lotus|Mus|Oryza sativa|Panax ginseng|Populus deltoides|Rattus|Ruegeria pomeroyi|Saccharomyces cerevisiae|Solanum lycopersicum|Synechococcus elongatus|Synechocystis|Vitis vinifera	Hydroxy acids and derivatives	Beta hydroxy acids and derivatives	1a	2162	dnp:BQR68|chebi:6650|hmdb:HMDB0000744|beilstein registry number:1723539|cas:6915-15-7|chemspider:510|foodb:FDB008114|gmelin registry number:3325|kegg compounds:C00711|kegg drug:D04843|metacyc:RS-Malate|metlin:118|pmid:115032|ppdb:1352|pubchem cid:525|reaxys registry number:1723539|wikipedia:Malic_acid	0.8265	0.717	0.9454	1.3486	0.7172	0.7781	0.8387	0.6266	1.5045	1.2103	0.0759	0.1377	0.1265	0.1339	0.1084	0.1374	0.1252	0.1156
85	neg_418	Simple ID		1	neg	418	9.331	739.209	[M-H]-	genus	C33H40O19	3-{[(2S,3R,4S,5S,6R)-4,5-dihydroxy-6-(hydroxymethyl)-3-{[(2S,3R,4R,5R,6S)-3,4,5-trihydroxy-6-methyloxan-2-yl]oxy}oxan-2-yl]oxy}-5-hydroxy-2-(4-hydroxyphenyl)-7-{[(2S,3R,4R,5R,6S)-3,4,5-trihydroxy-6-methyloxan-2-yl]oxy}chromen-4-one	5.111	10.222	Unknown	3	8	739.209	[M-H]-	740.216	-0.0001974	3.272		DDELFAUOHDSZJL-CPGGTDLHSA-N	O=C4C(OC2OC(CO)C(O)C(O)C2(OC1OC(C)C(O)C(O)C1(O)))=C(OC5=CC(OC3OC(C)C(O)C(O)C3(O))=CC(O)=C45)C6=CC=C(O)C=C6	Arabidopsis thaliana|Lotus edulis|Vicia faba	Flavonoids	Flavonoid glycosides	1a	3999	chebi:68879|unpd:UNPD62308|pmid:22014228|reaxys registry number:7164389	0	0	0	0	0.0064	0	0	0	0	0.0039	0.5831	0.6062	0.5888	0.7374	0.6303	0.6413	0.5601	0.6449
86	neg_48	Simple ID		2	neg	48	5.999	164.071	[M-H]-	Standard	C9H11NO2	L-phenylalanine	7.0827	14.1654	(IROA) PHENYLALANINE	3	7	164.071	[M-H]-	165.079	0.0003021	4.204		COLNVLDHVKWLRT-SVGMAFHSNA-N	O=C(O)C(N)CC1=CC=CC=C1	Arabidopsis thaliana|Catharanthus roseus|Escherichia coli|Sinocrassula indica|Solanum|Taraxacum formosanum|Ulva|Zyzzya fuliginosa			1a	188979	knapsack:C00001386|cas:63-91-2	0.7222	0.6963	0.6902	0.7835	0.6487	0.6771	0.5194	0.3428	0.9846	0.9297	1.7541	2.1938	2.1349	2.0181	2.0032	1.4159	1.6608	1.8671
87	neg_50	Simple ID		1	neg	50	1.326	165.04	[M-H]-	genus	C5H10O6	(2S,3S,4R)-2,3,4,5-tetrahydroxypentanoic acid	7.1264	14.2528	Unknown	3	6	165.04	[M-H]-	166.048	0.0003616	4.45		QXKAIJAYHKCRRA-UZBSEBFBSA-N	O=C(O)C(O)C(O)C(O)CO	Arabidopsis thaliana	Organooxygen compounds	Carbohydrates and carbohydrate conjugates	1a	37090	chebi:134538|unpd:UNPD42700|cas:28223-40-7|chemspider:134810|metacyc:CPD-8902|patent:CN1602762|pmid:11841815|reaxys registry number:1724266	2.128	2.0494	2.1767	1.8804	2.7087	1.955	2.013	2.5923	3.2243	2.3685	1.3956	1.3537	1.7052	1.7338	1.3714	1.745	1.4718	1.9506
88	neg_52	Simple ID		1	neg	52	3.319	167.021	[M-H]-	Standard	C5H4N4O3	Uric acid	5.5205	11.041	(IROA) URATE	3	7	167.021	[M-H]-	168.028	0.0001635	4.11		LEHOTFFKMJEONL-UHFFFAOYSA-N	OC=1N=C(O)C=2N=C(O)NC=2(N=1)	Arabidopsis thaliana|Bombyx mori|Bos taurus|Crassostrea|Escherichia coli|Glycine max|Homo sapiens|Mamestra brassicae|Mus|Platynereis dumerilii|Theobroma cacao|Vespertilio	Imidazopyrimidines	Purines and purine derivatives	1a	16800	dnp:JZR60|chebi:17775|hmdb:HMDB0000289|knapsack:C00007301|plantcyc:CPD-15332|unpd:UNPD91330|beilstein registry number:1111913|bigg:34768|bmdb:BMDB00289|cas:69-93-2|chemspider:1142|drugbank:DB01696|foodb:FDB015350|gmelin registry number:241332|kegg compounds:C00366|metacyc:URATE|metlin:88|pdb:URC|pmid:10102915|pubchem cid:1175|reaxys registry number:156158|smpdb:PW_C000195|stoff:STOFF_8572|wikiped…	1.9319	1.9495	1.8817	2.7718	1.6882	1.6718	1.7769	0.9035	3.1625	2.8131	0.8289	0.8725	0.8209	0.7459	0.6386	0.817	0.7651	0.6751
89	neg_54	Simple ID		1	neg	54	8.973	172.098	[M-H]-	generic	C8H15NO3	N-Acetylleucine	5.9597	5.9597	Unknown	3	4	172.098	[M-H]-	173.105	0.0002169	3.41	Leucine and derivatives	WXNXCEHXYPACJF-ZETCQYMHSA-N	O=C(O)C(NC(=O)C)CC(C)C						HMDB=HMDB0011756,ChEBI=CHEBI:17786;CHEBI:58270;CHEBI:94479,YMDB=YMDB00829,FooDB=FDB028426,BMDB=BMDB11756,Saliva=HMDB0011756,Feces=HMDB0011756,BLEXP=BLEXPDB00000001995	0.6793	0.6589	0.8284	0.8879	0.8459	0.8003	0.8542	0.6948	1.1358	1.1267	0.5983	0.7243	0.7411	0.9357	0.9639	0.9064	0.8094	1.0655
90	neg_55	Simple ID		1	neg	55	6.241	173.045	[M-H]-	genus	C7H10O5	(2S)-2-isopropyl-3-oxobutanedioate	5.6106	11.2212	Unknown	3	4	173.045	[M-H]-	174.053	0.000447	3.444		HIIZAGQWABAMRR-BYPYZUCNSA-L	O=C([O-])C(=O)C(C(=O)[O-])C(C)C	Aegilops tauschii|Ananas comosus|Arabidopsis halleri|Arabidopsis thaliana|Asparagus officinalis|Beta vulgaris|Brassica napus|Calotropis gigantea|Camptotheca acuminata|Capsella grandiflora|Capsicum annuum|Carica papaya|Catharanthus roseus|Chenopodium quinoa|Coccomyxa|Cucumis sativus|Daucus carota|Dianthus caryophyllus|Dioscorea|Eutrema salsugineum|Glycine max|Hordeum vulgare|Kalanchoe fedtschenkoi…	Keto acids and derivatives	Short-chain keto acids and derivatives	1a	10576	chebi:17214|hmdb:HMDB12149|plantcyc:CPD-7100|bigg:3c4mop|kegg ligand:C04236|metacyc:CPD-7100|pubchem cid:25245894|refmet:2-Isopropyl-3-oxosuccinate	0.0053	0.0062	0.0123	0.0071	0.0069	0.0049	0.0022	0.0061	0.0073	0.006	1.0973	0.6054	0.6288	0.4449	0.4462	0.5057	0.7279	1.1511
91	neg_56	Simple ID		1	neg	56	2.003	173.045	[M-H]-	genus	C7H10O5	shikimate	6.0093	12.0186	Unknown	3	5	173.045	[M-H]-	174.053	0.000447	3.647		JXOHGGNKMLTUBP-HSUXUTPPSA-M	O=C([O-])C1=CC(O)C(O)C(O)C1	Ananas comosus|Aquilegia coerulea|Arabidopsis halleri|Arabidopsis thaliana|Asparagus officinalis|Beta vulgaris|Boechera stricta|Brassica napus|Capsicum annuum|Carica papaya|Coccomyxa|Cucumis sativus|Daucus carota|Dianthus caryophyllus|Dioscorea|Escherichia coli|Eutrema salsugineum|Glycine max|Gossypium raimondii|Helianthus annuus|Kalanchoe fedtschenkoi|Lotus|Malus|Manihot esculenta|Marchantia pol…	Organooxygen compounds	Alcohols and polyols	1a	13176	chebi:36208|hmdb:HMDB03070|plantcyc:SHIKIMATE|bigg:skm|cas:138-59-0|chemspider:5414360|kegg ligand:C00493|pubchem cid:7057976|refmet:Shikimic acid	0.7166	0.6658	0.9761	0.7278	0.622	0.6393	0.6984	0.6654	0.6257	0.5483	0.1642	0.1137	0.1405	0.1236	0.1158	0.1412	0.1302	0.149
92	neg_58	Simple ID		1	neg	58	1.441	173.093	[M-H]-	genus	C7H14N2O3	(2S)-5-amino-2-[(1-hydroxyethylidene)amino]pentanoic acid	6.1023	12.2046	Unknown	3	6	173.093	[M-H]-	174.1	0.0004659	3.53		JRLGPAXAGHMNOL-LURJTMIESA-N	O=C(O)C(N=C(O)C)CCCN	Aegilops tauschii|Anacardium occidentale|Ananas comosus|Aquilegia coerulea|Arabidopsis halleri|Arabidopsis thaliana|Asparagus officinalis|Beta vulgaris|Boechera stricta|Brachypodium distachyon|Camptotheca acuminata|Capsella rubella|Capsicum annuum|Chenopodium quinoa|Citrus|Coccomyxa|Corchorus capsularis|Daucus carota|Dianthus caryophyllus|Escherichia coli|Eucalyptus grandis|Glycine max|Gossypium …	Carboxylic acids and derivatives	Amino acids, peptides, and analogues	1a	14412	chebi:16543|hmdb:HMDB0003357|plantcyc:N-ALPHA-ACETYLORNITHINE|beilstein registry number:1725555|bigg:acorn|bmdb:BMDB03357|cas:2185-16-2|chemspider:388369|foodb:FDB023152|kegg compounds:C00437|kegg ligand:C00437|metabolights:MTBLC57805|metacyc:N-ALPHA-ACETYLORNITHINE|pdb:AOR|pmid:19212411|pubchem cid:439232|reaxys registry number:1725555|refmet:N-Acetylornithine|ymdb:YMDB00028	0	0	0.0149	0	0	0	0	0.0079	0	0	0.5673	0.8278	0.6633	0.5638	0.5928	0.5111	0.5813	0.6313
93	neg_59	Simple ID	Other possible annotated peaks for this cluster.	3	neg	59	1.243	174.088	[M-H]-	Standard	C6H13N3O3	L(+)-citrulline	4.9238	9.8476	(IROA) CITRULLINE	3	3	174.088	[M-H]-	175.096	0.0006148	3.268		RHGKLRLOHDJJDR-SGAVLPGINA-N	O=C(O)C(N)CCCNC(=N)O	Arabidopsis thaliana|Citrullus|Escherichia coli|Sesamum indicum			1a	202928	knapsack:C00001348|cas:372-75-8	4.8146	4.561	6.3358	4.1688	3.1949	2.2602	4.9125	5.2065	1.9874	2.3739	22.6483	24.5071	28.6416	26.7932	25.3129	23.3141	22.3613	21.7056
94	neg_60	Simple ID		2	neg	60	1.308	175.047	[M-H]-	genus	C4H8N4O4	2,2-bis(C-hydroxycarbonimidoylamino)acetate	4.0805	8.161	Unknown	3	4	175.047	[M-H]-	176.055	0.0004783	2.871		NUCLJNSWZCHRKL-UHFFFAOYSA-M	O=C([O-])C(NC(=N)O)NC(=N)O	Aegilops tauschii|Anacardium occidentale|Ananas comosus|Aquilegia coerulea|Arabidopsis lyrata|Asparagus officinalis|Beta vulgaris|Boechera stricta|Capsella rubella|Carica papaya|Chenopodium quinoa|Citrus|Coccomyxa|Cucumis sativus|Daucus carota|Dianthus caryophyllus|Helianthus annuus|Homo sapiens|Hordeum vulgare|Leersia perrieri|Malus|Manihot esculenta|Marchantia polymorpha|Mimulus|Musa acuminata|…	Carboxylic acids and derivatives	Amino acids, peptides, and analogues	1a	19398	chebi:17536|hmdb:HMDB01209|plantcyc:ALLANTOATE|bigg:alltt|cas:99-16-1|chemspider:4449824|drugbank:DB04380|kegg ligand:C00499|metabolights:MTBLC17536|metacyc:ALLANTOATE|pubchem cid:5287444|refmet:Allantoic acid	0.0403	0.0692	0.0244	0.0968	0.0812	0.0585	0.0281	0.0459	0.06	0.0335	1.8926	1.3153	1.7855	1.5873	1.7624	1.3784	1.4211	1.5889
95	neg_120	Simple ID	Other possible annotated peaks for this cluster.	8	neg	120	10.274	223.062	[M-H]-	genus	C11H12O5	sinapate	6.7295	13.459	Unknown	3	7	223.061	[M-H]-	224.068	-0.000303	4.162		PCMORTLOPMLEFB-ONEGZZNKSA-M	O=C([O-])C=CC=1C=C(OC)C(O)=C(OC)C=1	Aegilops tauschii|Anacardium occidentale|Ananas comosus|Aquilegia coerulea|Arabidopsis thaliana|Asparagus officinalis|Boechera stricta|Brassica napus|Brassica rapa|Camptotheca acuminata|Citrus|Corchorus capsularis|Cucumis sativus|Daucus carota|Dianthus caryophyllus|Dioscorea|Eutrema salsugineum|Gossypium raimondii|Hordeum vulgare|Humulus lupulus|Kalanchoe fedtschenkoi|Kalanchoe laxiflora|Linum us…	Cinnamic acids and derivatives	Hydroxycinnamic acids and derivatives	1a	23139	chebi:30023|hmdb:HMDB32616|plantcyc:SINAPATE|cas:530-59-6|chemspider:4573878|kegg ligand:C00482|nci:59261|pubchem cid:5460292|refmet:Sinapic acid	14.0946	17.2725	20.806	30.0506	17.1598	21.5243	21.8341	17.0303	32.667	31.8083	0.4499	0.657	0.5707	0.587	0.64	1.025	1.0133	0.4503
96	neg_66	Unknown compound		1	neg	66	1.237	182.075	[M-C6H10O5-H]-	Unknown																						2.4921	2.3701	3.4631	3.98	1.0495	0.9969	2.6039	1.3888	2.7832	2.9274	1.1398	1.2203	1.2739	1.2816	1.2599	1.5193	1.1286	1.2471
97	neg_68	Unknown compound		1	neg	68	1.392	185.022	[M-H]-	Unknown																						4.4988	6.4795	6.493	6.5684	6.1225	5.3267	4.6435	4.5102	5.4593	4.1066	1.6631	1.4658	1.1672	1.3891	1.7007	1.5329	1.7265	1.4023
98	neg_71	Simple ID		2	neg	71	1.373	189.088	[M-H]-	Standard	C7H14N2O4	diaminopimelic acid	6.9881	13.9762	(IROA) DIAMINOPIMELATE	3	12	189.088	[M-H]-	190.095	0.0002805	4.083		GMKMEZVLHJARHF-SYDPRGILNA-N	O=C(O)C(N)CCCC(N)C(=O)O	Arabidopsis thaliana|Escherichia coli	Carboxylic acids and derivatives	Amino acids, peptides, and analogues	1a	156007	knapsack:C00007595	0.2502	0.196	0.2511	0.2121	0.1432	0.1051	0.2344	0.1562	0.224	0.1974	3.3311	4.1899	4.1097	4.3839	4.1011	4.0196	3.8904	4.3453
99	neg_76	Unknown compound		1	neg	76	5.641	193.054	[M-H]-	Unknown																						0.2496	0.2097	0.1612	0.2115	0.2167	0.1753	0.1381	0.1437	0.2547	0.2005	0.0095	0.0075	0.0057	0.0129	0.0048	0.0054	0.0066	0.0093
100	neg_92	Simple ID		1	neg	92	7.309	203.083	[M-H]-	genus	C11H12N2O2	Tryptophan|Tryptophan; (R)-form|Tryptophan; (S)-form|Tryptophan; (?)-form	6.2418	12.4836	Unknown	3	8	203.083	[M-H]-	204.09	0.0001012	4.045		QIVBCDIJIAJPQS-UHFFFAOYSA-N	O=C(O)C(N)CC2=CNC1=CC=CC=C12	Arabidopsis thaliana|Brassica napus|Caenorhabditis elegans|Calanus helgolandicus|Cichorium intybus|Cucumaria georgiana|Daphnia|Homo sapiens|Lactuca sativa|Mus|Nicotiana attenuata|Oryza sativa|Panax ginseng|Populus deltoides|Pseudomonas putida|Ruegeria pomeroyi|Saccharomyces cerevisiae|Schizosaccharomyces pombe|Sea|Synechococcus elongatus	Indoles and derivatives	Indolyl carboxylic acids and derivatives	1a	46343	dnp:CHP14|chebi:27897|hmdb:HMDB0030396|knapsack:C00001396|beilstein registry number:86196|cas:54-12-6|chemspider:1116|foodb:FDB002251|gmelin registry number:4532|kegg compounds:C00806|lincs:LSM-36836|pmid:13864966|pubchem cid:1148|reaxys registry number:86196|wikipedia:Tryptophan	0.2118	0.1998	0.1676	0.3073	0.1878	0.2386	0.1497	0.1252	0.2217	0.2214	0.4887	0.6052	0.5459	0.4987	0.7072	0.4549	0.5121	0.5734
101	pos_104	Unknown compound		1	pos	104	1.245	136.079	[M+H]+	Unknown																						0.6163	0.3297	1.2973	0.2647	0.598	0.5736	0.4431	0.5431	0.443	0.5022	1.4278	1.2931	1.6185	1.305	1.7466	1.3425	1.4801	1.5951
102	pos_105	Simple ID		1	pos	105	2.807	137.046	[M+H]+	Standard	C5H4N4O	6-Purinol; 1,7-Dihydro-form|6-Purinol; 1,9-Dihydro-form|6-Purinol; 3,7-Dihydro-form|6-Purinol; 3,9-Dihydro-form|6-Purinol; 7,9-Dihydro-form|6-Purinol; OH,3H-form|6-Purinol; OH,7H-form|6-Purinol; OH,9H-form	4.4287	8.8574	(IROA) HYPOXANTHINE	3	54	137.046	[M+H]+	136.039	-1.28e-05	3.387		FDGQSTZJBFJUBT-UHFFFAOYSA-N	OC1=NC=NC=2NC=NC1=2	Anacardium occidentale|Ananas comosus|Aquilegia coerulea|Arabidopsis halleri|Arabidopsis thaliana|Asparagus officinalis|Beta vulgaris|Boechera stricta|Bos taurus|Brassica rapa|Capsicum annuum|Catharanthus roseus|Cervus nippon|Coccomyxa|Coffea|Coprinus|Corchorus capsularis|Cordyceps|Daphnia|Daucus carota|Escherichia coli|Fritillaria cirrhosa|Glycine max|Gossypium raimondii|Homo sapiens|Kalanchoe f…	Imidazopyrimidines	Purines and purine derivatives	1a	6178	dnp:BVS77|chebi:17368|hmdb:HMDB0000157|knapsack:C00001502|plantcyc:HYPOXANTHINE|t3db:T3D4150|unpd:UNPD77089|beilstein registry number:5811|bigg:hxan|biocyc:HYPOXANTHINE|bmdb:BMDB00157|cas:146445-70-7|chembl:CHEMBL1427|chemspider:768|drugbank:DB04076|foodb:FDB003949|gmelin registry number:464558|kegg compounds:C00262|kegg ligand:C00262|metabolights:MTBLC17368|metacyc:HYPOXANTHINE|metlin:83|pdb:HPA…	0.0054	0	0.0319	0.0173	0.0027	0.0146	0	0.0068	0	0.0061	0.0491	0.0361	0.0409	0.0456	0.0384	0.036	0.0357	0.0388
103	pos_108	Simple ID		1	pos	108	8.657	138.055	[M+H]+	genus	C7H7NO2	p-aminobenzoate	5.3157	10.6314	Unknown	3	25	138.055	[M+H]+	137.048	-4.51e-05	3.453		ALYNCZNDIQEVRV-UHFFFAOYSA-M	O=C([O-])C1=CC=C(N)C=C1	Aegilops tauschii|Amborella trichopoda|Ananas comosus|Aquilegia coerulea|Arabidopsis halleri|Arabidopsis thaliana|Asparagus officinalis|Beta vulgaris|Boechera stricta|Carica papaya|Catharanthus roseus|Citrus|Coccomyxa|Cucumis sativus|Daucus carota|Homo sapiens|Hordeum vulgare|Humulus lupulus|Leersia perrieri|Linum usitatissimum|Malus|Marchantia polymorpha|Mimulus|Miscanthus sinensis|Musa acuminat…	Benzene and substituted derivatives	Benzoic acids and derivatives	1a	686	chebi:17836|hmdb:HMDB01392|plantcyc:P-AMINO-BENZOATE|beilstein registry number:3904778|bigg:35376|cas:150-13-0|chemspider:4710|gmelin registry number:82609|kegg ligand:C00568|pubchem cid:4876|reaxys registry number:3904778|refmet:P-Aminobenzoic acid	0.1044	0.0848	0.173	0.1118	0.181	0.1061	0.1496	0.2115	0.1158	0.3619	0.481	0.4843	0.4216	0.4503	0.2328	0.352	0.6227	0.5332
104	pos_127	Simple ID		1	pos	127	2.66	146.063	[M+H]+	genus	C6H11NOS	5-[(R)-methanesulfinyl]pentanenitrile	3.8226	7.6452	Unknown	3	52	146.063	[M+H]+	145.056	1.14e-05	2.799		FGYQUFZANKOISC-UHFFFAOYNA-N	N#CCCCCS(=O)C	Arabidopsis thaliana	Sulfoxides		1a	164968	knapsack:C00007667|unpd:UNPD220135	1.0644	1.2841	0.7634	0.7912	1.5012	1.4091	1.0974	1.7361	0.6898	0.5738	0.1184	0.1037	0.1021	0.1085	0.1139	0.1324	0.1185	0.1238
105	pos_136	Simple ID		1	pos	136	1.46	148.06	[M+H]+	genus	C5H9NO4	Glutamic acid|Glutamic acid; (R)-form|Glutamic acid; (S)-form|Glutamic acid; (?)-form	6.189	12.378	Unknown	3	28	148.06	[M+H]+	147.053	0.0001342	3.513		WHUUTDBJXJRKMK-UHFFFAOYSA-N	O=C(O)CCC(N)C(=O)O	Arabidopsis thaliana|Bacillus methanolicus|Brassica napus|Caenorhabditis elegans|Cucumaria|Daphnia|Homo sapiens|Mus|Oryza sativa|Panax ginseng|Populus deltoides|Rattus norvegicus|Ruegeria pomeroyi|Saccharomyces cerevisiae|Sea|Synechococcus elongatus	Carboxylic acids and derivatives	Amino acids, peptides, and analogues	1a	40636	dnp:BCT45|chebi:18237|hmdb:HMDB0060475|knapsack:C00001358|beilstein registry number:1723799|cas:617-65-2|foodb:FDB012536|gmelin registry number:101971|kegg compounds:C00302|kegg drug:D04341|pmid:15739367|pubchem cid:611|reaxys registry number:1723799|wikipedia:Glutamic_acid	7.73	7.5918	6.9808	7.1581	7.0519	6.4321	5.8368	5.409	6.5113	5.1385	5.7879	6.042	6.0151	4.9083	4.6897	4.311	4.4147	3.6379
106	pos_138	Simple ID		1	pos	138	7.073	148.06	[M+H]+	genus	C5H9NO4	O-acetyl-L-serine	4.277	8.554	Unknown	3	25	148.06	[M+H]+	147.053	3.42e-05	3.134		VZXPDPZARILFQX-SGAVLPGINA-N	O=C(O)C(N)COC(=O)C	Arabidopsis thaliana|Escherichia coli			1a	166922	chebi:17981|hmdb:HMDB0003011|knapsack:C00007459|plantcyc:ACETYLSERINE|bmdb:BMDB03011|cas:5147-00-2|drugbank:DB01837|foodb:FDB004955|pubchem cid:25245438|ymdb:YMDB00652	0.0829	0.0373	0.0333	0.0338	0.0292	0.0316	0.0265	0.0159	0.0181	0.0155	0.0232	0.0267	0.0169	0.0158	0.0245	0.0133	0.0134	0.0107
107	pos_174	Unknown compound		1	pos	174	7.902	158.096	[M+H]+	Unknown																						0.9014	0.8334	0.9156	0.8928	0.744	0.8073	0.8736	0.7567	1.0306	0.9483	0.6605	0.7911	0.7135	0.7843	0.3884	0.8322	0.7007	0.7304
108	pos_199	Simple ID		1	pos	199	1.712	162.076	[M+H]+	Standard	C6H11NO4	Aminoadipic acid	6.8984	6.8984	(IROA) N-METHYLGLUTAMATE	3	103	162.076	[M+H]+	161.069	8.43e-05	3.352	L-alpha-amino acids	OYIFNHCXNCRBQI-UHFFFAOYNA-N	O=C(O)CCCC(N)C(=O)O						HMDB=HMDB0000510,KNApSAcK=C00007393,ChEBI=CHEBI:17082;CHEBI:37023;CHEBI:37024;CHEBI:37025;CHEBI:58672;CHEBI:84981,SMPDB=PW_C000390,YMDB=YMDB00999,T3DB=T3D4259,FooDB=FDB006066;FDB006672;FDB007648;FDB021812,BMDB=BMDB00510,LipidMAPS=LMFA01170098,Urine=HMDB0000510,Saliva=HMDB0000510,Feces=HMDB0000510,ECMDB=ECMDB00510,Serum=HMDB0000510,PubChem=6992111;5460399;92136,PlantCyc=CPD-468,UNPD=UNPD120750;UNP…	1.2471	1.4559	1.014	1.6158	1.0548	1.2299	1.4954	1.2734	0.6978	0.811	0.9472	0.8608	0.7682	0.8514	0.7588	0.9152	0.8169	0.7617
109	pos_203	Simple ID		1	pos	203	14.483	163.112	[M+H]+	generic	C11H14O	4'-Isopropylacetophenone	5.6456	5.6456	Unknown	3	86	163.112	[M+H]+	162.104	4.15e-05	3.086	Alkyl-phenylketones	PDLCCNYKIIUWHA-UHFFFAOYSA-N	O=C(C1=CC=C(C=C1)C(C)C)C						HMDB=HMDB0032025,FooDB=FDB008723,STOFF=STOFF_3446	0.4856	0.4292	0.4436	0.4734	0.6895	0.4155	0.4953	0.4483	0.601	0.5052	0.5454	0.5427	0.4589	0.5376	0.5549	0.5768	0.5195	0.4777
110	pos_220	Simple ID		1	pos	220	2.419	169.036	[M+H]+	Standard	C5H4N4O3	Uric acid	4.3651	8.7302	(IROA) URATE	3	76	169.036	[M+H]+	168.028	1.64e-05	3.504		LEHOTFFKMJEONL-UHFFFAOYSA-N	OC=1N=C(O)C=2N=C(O)NC=2(N=1)	Arabidopsis thaliana|Bombyx mori|Bos taurus|Crassostrea|Escherichia coli|Glycine max|Homo sapiens|Mamestra brassicae|Mus|Platynereis dumerilii|Theobroma cacao|Vespertilio	Imidazopyrimidines	Purines and purine derivatives	1a	16800	dnp:JZR60|chebi:17775|hmdb:HMDB0000289|knapsack:C00007301|plantcyc:CPD-15332|unpd:UNPD91330|beilstein registry number:1111913|bigg:34768|bmdb:BMDB00289|cas:69-93-2|chemspider:1142|drugbank:DB01696|foodb:FDB015350|gmelin registry number:241332|kegg compounds:C00366|metacyc:URATE|metlin:88|pdb:URC|pmid:10102915|pubchem cid:1175|reaxys registry number:156158|smpdb:PW_C000195|stoff:STOFF_8572|wikiped…	0.5738	0.5834	0.5645	0.7526	0.5899	0.6467	0.6417	0.3308	0.9881	0.854	0.291	0.3013	0.2733	0.2329	0.2147	0.307	0.3004	0.256
111	pos_231	Unknown compound		1	pos	231	1.661	174.076	[M-C6H10O4]+	Unknown																						0.145	0.1306	0.1696	0.1053	0.1162	0.1313	0.1216	0.1451	0.0907	0.0935	1.215	0.9994	0.9171	0.9125	1.0125	0.9992	0.9984	0.9031
112	pos_324	Simple ID	Other possible annotated peaks for this cluster.	14	pos	324	10.253	207.065	[M+H-H2O]+	genus	C11H12O5	sinapate	6.6885	13.377	Unknown	3	75	207.065	[M+H-H2O]+	224.068	8.53e-05	3.938		PCMORTLOPMLEFB-ONEGZZNKSA-M	O=C([O-])C=CC=1C=C(OC)C(O)=C(OC)C=1	Aegilops tauschii|Anacardium occidentale|Ananas comosus|Aquilegia coerulea|Arabidopsis thaliana|Asparagus officinalis|Boechera stricta|Brassica napus|Brassica rapa|Camptotheca acuminata|Citrus|Corchorus capsularis|Cucumis sativus|Daucus carota|Dianthus caryophyllus|Dioscorea|Eutrema salsugineum|Gossypium raimondii|Hordeum vulgare|Humulus lupulus|Kalanchoe fedtschenkoi|Kalanchoe laxiflora|Linum us…	Cinnamic acids and derivatives	Hydroxycinnamic acids and derivatives	1a	23139	chebi:30023|hmdb:HMDB32616|plantcyc:SINAPATE|cas:530-59-6|chemspider:4573878|kegg ligand:C00482|nci:59261|pubchem cid:5460292|refmet:Sinapic acid	23.3792	29.3811	30.412	37.8013	26.6296	32.9781	32.6528	29.7276	43.3786	37.3724	1.3231	1.6122	1.348	1.3612	1.5662	2.3518	2.0651	0.7707
113	pos_242	Simple ID		1	pos	242	5.978	178.09	[M+H]+	genus	C7H15NO2S	6-(methylsulfanyl)norleucine	5.4693	10.9386	Unknown	3	109	178.089	[M+H]+	177.082	0.0001262	3.205		FBWIRBFZWNIGJC-UHFFFAOYNA-N	O=C(O)C(N)CCCCSC	Arabidopsis thaliana	Carboxylic acids and derivatives	Amino acids, peptides, and analogues	1a	170392	chebi:134632|knapsack:C00007594|plantcyc:CPDQT-340|pubchem cid:228215	0.0966	0.1187	0.159	0.0529	0.0528	0.0973	0.1362	0.1861	0.015	0.0048	0.1976	0.1842	0.1759	0.1601	0.2286	0.1922	0.161	0.2034
114	pos_244	Simple ID		1	pos	244	5.895	178.126	[M+H]+	genus	C8H19NOS	7-(methylsulfinyl)heptylamine	5.1962	10.3924	Unknown	3	97	178.126	[M+H]+	177.119	0.0001117	3.111		NEMIGFQIONIZCH-UHFFFAOYSA-N	O=S(C)CCCCCCCN	Arabidopsis thaliana	Sulfoxides		1a	20006	chebi:91155|pmid:25457500|reaxys registry number:28063960	0.0627	0.0517	0.0603	0.0646	0.0596	0.0636	0.0608	0.0586	0.0727	0.0615	0.3704	0.4551	0.3744	0.3894	0.5284	0.3639	0.4363	0.476
115	pos_247	Unknown compound		1	pos	247	10.64	179.064	[M+H]+	Unknown																						1.0527	1.0455	1.116	1.022	0.5043	0.9946	1.0286	0.9108	1.2337	1.2049	0.6233	0.8216	0.7143	0.8191	0.3962	0.9096	0.78	0.7918
116	pos_193	Simple ID	Other possible annotated peaks for this cluster.	3	pos	193	7.539	160.079	[M+H]+	Standard	C7H13NOS	6-(methylsulfanyl)hexanenitrile oxide	4.9375	9.875	(IROA) INDOLEACETALDEHYDE	3	157	160.079	[M+H]+	159.072	6.15e-05	3.079		XSPNTRJDTKNMDO-UHFFFAOYSA-N	[O-][N+]#CCCCCCSC	Arabidopsis thaliana	Organonitrogen compounds	Organic cyanides	1a	36760	chebi:136942|plantcyc:CPD-12395|chemspider:24785403	0.4921	0.5033	0.4466	0.3393	1.2298	1.2507	0.4002	0.4867	0.7804	0.9176	0.591	0.5041	0.5672	0.6013	0.6806	0.7372	0.538	0.7365
117	pos_258	Simple ID		1	pos	258	3.159	182.081	[M+H]+	Standard	C9H11NO3	Tyrosine|Tyrosine; (R)-form|Tyrosine; (S)-form|Tyrosine; (?)-form	6.0675	12.135	(IROA) TYROSINE	3	61	182.081	[M+H]+	181.074	6.97e-05	3.53		OUYCCCASQSFEME-UHFFFAOYSA-N	O=C(O)C(N)CC1=CC=C(O)C=C1	Arabidopsis thaliana|Astragalus mongholicus|Brassica napus|Caenorhabditis elegans|Daphnia|Homo sapiens|Lactuca sativa|Mus|Oryza sativa|Ovis aries|Photinus pyralis|Pseudomonas putida|Saccharomyces cerevisiae|Schizosaccharomyces pombe|Sea|Solanum|Vitis vinifera	Carboxylic acids and derivatives	Amino acids, peptides, and analogues	1a	21622	dnp:BBG58|knapsack:C00001397|beilstein registry number:515881|cas:55520-40-6|gmelin registry number:27744|pmid:17190852|reaxys registry number:515881	0.6182	0.6565	0.5013	0.7253	0.6723	0.8591	0.4353	0.363	0.8828	0.7914	1.1447	1.252	1.2015	1.1777	1.3636	0.9085	1.0806	1.2378
118	pos_259	Simple ID		1	pos	259	9.906	182.19	[M+H]+	genus	C12H23N	Dodecanoic acid; Nitrile	4.3307	8.6614	Unknown	3	114	182.19	[M+H]+	181.183	0.0001262	2.922		VXCUURYYWGCLIH-UHFFFAOYSA-N	N#CCCCCCCCCCCC	Pseudomonas	Organonitrogen compounds	Organic cyanides	1b	1080365	dnp:GZC81|npatlas:NPA024359	0.3836	0.4022	0.3695	0.368	0.5505	0.4118	0.4129	0.3774	0.6336	0.5205	0.4532	0.535	0.4939	0.3378	0.35	0.4969	0.3689	0.3674
119	pos_267	Simple ID	Other possible annotated peaks for this cluster.	2	pos	267	10.817	185.115	[M+Na]+	generic	C8H18O3	(3R,7R)-1,3,7-Octanetriol	4.8437	4.8437	Unknown	3	73	185.115	[M+Na]+	162.126	1.51e-05	2.885	Fatty alcohols	NGACGNKKNNNNHK-UHFFFAOYNA-N	OCCC(O)CCCC(O)C						HMDB=HMDB0033625,FooDB=FDB011713;FDB011714,UNPD=UNPD93522,BLEXP=BLEXPDB00010997367	0.6995	0.7351	0.6991	0.7134	0.2823	0.6049	0.6128	0.5633	0.7921	0.8359	0.5139	0.5724	0.5517	0.5768	0.1934	0.6659	0.5768	0.5267
120	pos_270	Unknown compound		1	pos	270	6.633	187.541	[M+H]+	Unknown																						0	0	0	0	0	0	0	0	0	0	0.4143	0.4029	0.3015	0.4018	0.4092	0.458	0.4641	0.4376
121	pos_272	Simple ID		1	pos	272	10.219	188.11	[M+H]+	genus	C9H17NOS	8-methanesulfinyloctanenitrile	5.7533	11.5066	Unknown	3	116	188.11	[M+H]+	187.103	6.16e-05	3.523		VRYSUGWFYFXWLB-UHFFFAOYSA-N	N#CCCCCCCCS(=O)C	Arabidopsis thaliana	Sulfoxides		1a	49166	chebi:91154|pmid:25457500|reaxys registry number:5496217	0.4755	0.5673	0.3547	0.3699	1.2248	1.1305	0.4668	0.5472	0.6695	0.6561	1.2256	1.0338	1.163	1.084	1.6781	1.1792	1.0279	1.3885
122	pos_276	Unknown compound		1	pos	276	1.858	191.048	[M+H]+	Unknown																						0.4428	0.9001	0.2571	1.2623	0.0649	0.3097	1.0831	0.4448	0.2423	0.1274	0.0991	0.1207	0.0688	0.1148	0.0568	0.1262	0.0731	0.0891
123	pos_273	Simple ID	Other possible annotated peaks for this cluster.	3	pos	273	10.6	190.071	[M+H]+	genus	C7H11NO5	(4S)-4-carboxy-4-[(1-oxidoethylidene)amino]butanoate	4.4325	8.865	Unknown	3	81	190.071	[M+H]+	189.064	-0.0004011	3.002		RFMMMVDNIPUKGG-YFKPBYRVSA-L	O=C([O-])CCC(N=C([O-])C)C(=O)O	Amborella trichopoda|Ananas comosus|Aquilegia coerulea|Arabidopsis halleri|Arabidopsis thaliana|Asparagus officinalis|Beta vulgaris|Boechera stricta|Brassica napus|Brassica rapa|Capsicum annuum|Citrus|Coccomyxa|Cucumis sativus|Daucus carota|Helianthus annuus|Kalanchoe laxiflora|Leersia perrieri|Linum usitatissimum|Lotus|Malus|Marchantia polymorpha|Medicago truncatula|Mimulus|Musa acuminata|Oropet…	Carboxylic acids and derivatives	Amino acids, peptides, and analogues	1a	39357	chebi:12575|hmdb:HMDB01138|plantcyc:ACETYL-GLU|bigg:acglu|cas:1188-37-0|chemspider:1266066|kegg compounds:C00624|kegg ligand:C00624|metabolights:MTBLC44337|pubchem cid:1549099|refmet:N-acetylglutamic acid	1.4386	1.4857	1.9392	1.552	0.1162	1.6197	1.6491	1.7318	1.5741	2.4127	0.9486	1.5118	1.1018	1.3323	0.1784	1.7386	1.408	1.345
124	pos_283	Simple ID		1	pos	283	7.006	192.142	[M+H]+	genus	C9H21NOS	8-(methylsulfinyl)octylamine	6.307	12.614	Unknown	3	76	192.142	[M+H]+	191.134	6.17e-05	3.63		SSWZIHDEYOORCA-UHFFFAOYSA-N	O=S(C)CCCCCCCCN	Arabidopsis thaliana	Sulfoxides		1a	48877	chebi:91158|pmid:25457500|reaxys registry number:28063961	0.6471	0.4101	0.5698	0.2685	0.3055	0.398	0.2592	0.2671	0.299	0.3613	3.1521	3.8911	3.7147	3.6382	4.9132	3.1195	3.3568	4.5828
125	pos_284	Unknown compound		1	pos	284	6.37	192.534	[M+H]+	Unknown																						0	0	0	0	0	0	0	0	0	0	0.8378	0.7015	0.6019	0.6198	0.7615	0.7079	0.7045	0.7065
126	pos_290	Simple ID		1	pos	290	1.388	194.084	[M+H]+	genus	C7H15NO3S	(2S)-2-(hydroxyamino)-6-(methylsulfanyl)hexanoate	5.24	10.48	Unknown	3	58	194.084	[M+H]+	193.077	0.0001408	3.286		UCJWADAPVIQJLU-LURJTMIESA-M	O=C([O-])C(NO)CCCCSC	Arabidopsis halleri|Arabidopsis thaliana|Boechera stricta|Brassica napus|Carica papaya|Eutrema salsugineum	Carboxylic acids and derivatives	Amino acids, peptides, and analogues	1a	39614	chebi:134664|plantcyc:CPD-14047|metacyc:CPD-14047|pubchem cid:90658461	0.3774	0.3334	0.4118	0.2849	0.3891	0.2902	0.3439	0.3723	0.2687	0.3071	0.1874	0.1853	0.2119	0.1875	0.2195	0.1902	0.2081	0.1911
127	pos_292	Simple ID		1	pos	292	17.535	195.101	[M+H]+	genus	C11H14O3	2-Hydroxybenzoic acid; Butyl ester	5.0832	10.1664	Unknown	3	76	195.101	[M+H]+	194.094	7.08e-05	3.265		YFDUWSBGVPBWKF-UHFFFAOYSA-N	O=C(OCCCC)C1=CC=CC=C1(O)	Carica	Benzene and substituted derivatives	Benzoic acids and derivatives	1b	74615	dnp:MTK25|hmdb:HMDB0040730|cas:2052-14-4|chemspider:15495|foodb:FDB020539|pubchem cid:16330	4.6996	3.6326	4.3949	4.0848	5.7713	3.7453	4.146	3.9216	5.6801	4.5139	4.6805	4.5274	4.0332	4.2754	5.1135	4.0195	4.2184	3.8255
128	pos_153	Simple ID	Other possible annotated peaks for this cluster.	4	pos	153	5.562	151.096	[M+H]+	genus	C6H14O4	1,2,4,5-Hexanetetrol|1,2,4,5-Hexanetetrol; (2R,4R,5R)-form|1,2,4,5-Hexanetetrol; (2R,4S,5R)-form|1,2,4,5-Hexanetetrol; (2S,4S,5S)-form	4.9522	9.9044	Unknown	3	84	151.096	[M+H]+	150.089	-1.46e-05	2.957		SAYNRXAZCTXWFR-UHFFFAOYSA-N	OCC(O)CC(O)C(O)C	Salmonella	Fatty Acyls	Fatty alcohols	1b	922664	dnp:LBM91	0.3883	0.3419	0.2349	0.2698	1.3438	0.2112	0.327	0.236	0.575	0.5591	0.4349	0.2794	0.3181	0.2493	0.7532	0.2944	0.2585	0.2236
129	pos_0	Simple ID	Other possible annotated peaks for this cluster.	7	pos	0	6.465	100.076	[M+H]+	generic	C5H9NO	N-Methyl-2-pyrrolidone	8.7468	8.7468	Unknown	3	34	100.076	[M+H]+	99.0684	9.04e-05	5.017	N-alkylpyrrolidines	SECXISVLQFMRJM-UHFFFAOYSA-N	O=C1N(C)CCC1						KNApSAcK=C00039855,ChEBI=CHEBI:7307,T3DB=T3D4946,STOFF=STOFF_137,UNPD=UNPD129554,BLEXP=BLEXPDB00000013387	70.5116	66.0177	73.9546	68.775	0.4785	67.224	65.1635	55.6791	76.5596	76.8322	52.6349	59.7664	56.0165	57.4965	1.7417	63.1798	57.8306	54.3221
130	pos_306	Simple ID		1	pos	306	1.924	202.18	[M+H]+	genus	C11H23NO2	2-Amino-4-undecene-1,3-diol|2-Amino-4-undecene-1,3-diol; (2?,3?,4E)-form	5.6984	11.3968	Unknown	3	63	202.18	[M+H]+	201.173	0.0002554	3.517		MOVYVJGVXTYQEQ-BQYQJAHWSA-N	OCC(N)C(O)C=CCCCCCC		Organonitrogen compounds	Amines	1b	1072179	dnp:QCP62	0.9115	1.2066	0.9322	0.9192	0.629	0.5247	0.503	0.9954	0.4845	0.9415	1.4379	1.3665	0.512	1.5893	0.7855	1.3463	0.8334	0.7623
131	pos_307	Simple ID		1	pos	307	2.701	202.18	[M+H]+	genus	C11H23NO2	2-Amino-4-undecene-1,3-diol|2-Amino-4-undecene-1,3-diol; (2?,3?,4E)-form	5.4235	10.847	Unknown	3	66	202.18	[M+H]+	201.173	5.54e-05	3.379		MOVYVJGVXTYQEQ-BQYQJAHWSA-N	OCC(N)C(O)C=CCCCCCC		Organonitrogen compounds	Amines	1b	1072179	dnp:QCP62	0.452	0.4976	0.4184	0.4805	0.4456	0.486	0.4353	0.3809	0.4271	0.4279	0.6742	0.592	0.6363	0.6695	0.6557	0.6525	0.6403	0.6524
132	pos_308	Unknown compound		1	pos	308	7.396	202.565	[M+H]+	Unknown																						0.9714	0.9315	1.0545	0.7485	0.7747	1.0334	0.8391	0.8242	0.9208	0.9299	0.3843	0.3184	0.3823	0.329	0.3617	0.4271	0.3252	0.3696
133	pos_278	Simple ID	Other possible annotated peaks for this cluster.	2	pos	278	1.286	191.103	[M+H]+	Standard	C7H14N2O4	diaminopimelic acid	7.802	15.604	(IROA) DIAMINOPIMELATE	3	59	191.102	[M+H]+	190.095	0.0001334	4.5		GMKMEZVLHJARHF-SYDPRGILNA-N	O=C(O)C(N)CCCC(N)C(=O)O	Arabidopsis thaliana|Escherichia coli	Carboxylic acids and derivatives	Amino acids, peptides, and analogues	1a	156007	knapsack:C00007595	0.226	0.2253	0.2471	0.2373	0.11	0.1132	0.2366	0.1804	0.1535	0.1941	5.0902	5.92	4.5521	6.0365	5.2062	5.5141	4.5064	4.9996
134	pos_314	Unknown compound		1	pos	314	11.107	203.158	[M+H]+	Unknown																						0.0049	0.0065	0	0.0052	0	0	0	0.0041	0	0	0.4512	0.5267	0.386	0.5232	0.4161	0.6035	0.42	0.4893
135	pos_315	Simple ID		1	pos	315	8.46	204.113	[M+H]+	Standard	C11H13N3O	Tryptophanamide	6.2871	6.2871	(IROA) L-TRYPTOPHANAMIDE	3	57	204.113	[M+H]+	203.106	3.85e-05	3.502	Tryptamines and derivatives	JLSKPBDKNIXMBS-UHFFFAOYNA-N	O=C(N)C(N)CC2=CNC1=CC=CC=C12						HMDB=HMDB0013318,ChEBI=CHEBI:16533;CHEBI:57803,DrugBank=DB04537,FooDB=FDB029380,Urine=HMDB0013318,Serum=HMDB0013318	0.0046	0.0047	0.0046	0.0248	0.012	0.0055	0.0125	0.0084	0.0098	0.0037	0.3894	0.4386	0.414	0.4235	0.3329	0.4831	0.4335	0.3404
136	pos_304	Simple ID	Other possible annotated peaks for this cluster.	5	pos	304	11.545	202.126	[M+H]+	genus	C10H19NOS	9-Mercaptononanoic acid; S-Me, nitrile, S-oxide	6.4257	12.8514	Unknown	3	71	202.126	[M+H]+	201.119	0.0002117	3.849		XGRYRNQISNOEGY-UHFFFAOYSA-N	N#CCCCCCCCCS(=O)C	Arabidopsis thaliana|Rorippa sylvestris	Sulfoxides		1a	46934	dnp:FSY42|chebi:91153|pmid:25457500|reaxys registry number:7914995	4.1454	4.3656	3.0826	1.8945	8.0633	8.1872	3.7899	4.0652	3.1564	4.9884	9.0207	8.57	8.5784	8.7521	12.0442	7.568	8.3649	10.4727
137	pos_317	Simple ID		1	pos	317	10.383	205.079	[M+H]+	generic	C11H12N2S	Levamisole	5.3018	5.3018	Unknown	3	59	205.079	[M+H]+	204.072	9.58e-05	2.655	Imidazothiazoles	HLFSDGLLUJUHTE-SNVBAGLBSA-N	N2=C1N(CCS1)CC2C3=CC=CC=C3						HMDB=HMDB0014986,ChEBI=CHEBI:6432;CHEBI:77278;CHEBI:77282,DrugBank=DB00848,STOFF=STOFF_3433,Urine=HMDB0014986,Serum=HMDB0014986,BLEXP=BLEXPDB00000003913	1.5125	1.5519	1.203	1.6811	0.9234	0.9035	1.359	1.2295	1.0464	1.0724	0.7491	0.7772	0.9348	0.8389	0.662	0.7339	0.7957	0.5871
138	pos_329	Unknown compound		1	pos	329	9.158	210.062	[M+H]+	Unknown																						0.6065	0.285	0.8651	0.2099	0.1685	0.2467	0.3881	0.3588	0.2891	0.5327	0.0055	0.016	0.0149	0.0145	0.0259	0.0135	0.0075	0.013
139	pos_252	Simple ID	Other possible annotated peaks for this cluster.	2	pos	252	6.096	180.088	[M+H]+	Standard	C7H9N5O	2-(dimethylamino)-9H-purin-6-ol	4.9602	9.9204	(IROA) GALACTOSAMINE	3	88	180.088	[M+H]+	179.081	8.64e-05	3.409		XMSMHKMPBNTBOD-UHFFFAOYSA-N	OC1=NC(=NC=2NC=NC1=2)N(C)C		Imidazopyrimidines	Purines and purine derivatives	1b	242765	unpd:UNPD736|cas:1445-15-4|stoff:STOFF_8603	0.2846	0.263	0.2422	0.2341	0.2833	0.2831	0.2219	0.1764	0.2886	0.253	0.6214	0.5744	0.6212	0.6505	0.644	0.6177	0.5612	0.6106
140	pos_285	Simple ID	Other possible annotated peaks for this cluster.	3	pos	285	7.831	193.049	[M+H-H2O]+	genus	C10H10O5	2-[(1Z)-2-carboxyeth-1-en-1-yl]-5-hydroxy-4-methoxybenzenolate	6.4628	12.9256	Unknown	3	96	193.049	[M+H-H2O]+	210.053	3.52e-05	3.422		QVTORZSLDIMFQS-IHWYPQMZSA-M	O=C(O)C=CC1=CC(OC)=C(O)C=C1([O-])	Aegilops tauschii|Amaranthus hypochondriacus|Amborella trichopoda|Ananas comosus|Aquilegia coerulea|Arabidopsis halleri|Asparagus officinalis|Boechera stricta|Capsicum annuum|Catharanthus roseus|Chenopodium quinoa|Citrus|Cucumis sativus|Daucus carota|Dioscorea|Eucalyptus grandis|Eutrema salsugineum|Leersia perrieri|Linum usitatissimum|Lotus|Malus|Manihot esculenta|Mimulus|Musa acuminata|Oryza bra…	Cinnamic acids and derivatives	Hydroxycinnamic acids and derivatives	1a	251232	plantcyc:CPD-15076|pubchem cid:90657637	0.3742	0.5425	0.59	0.274	0.6957	1.0761	0.7425	1.0248	0.2192	0.2672	0	0	0	0	0	0.0031	0	0.0037
141	pos_342	Simple ID	Other possible annotated peaks for this cluster.	2	pos	342	8.141	217.097	[M+H]+	genus	C12H12N2O2	2,3,4,9-Tetrahydro-1H-pyrido[3,4-b]indole-3-carboxylic acid|2,3,4,9-Tetrahydro-1H-pyrido[3,4-b]indole-3-carboxylic acid; (S)-form	5.8771	11.7542	Unknown	3	71	217.097	[M+H]+	216.09	5.41e-05	3.249		FSNCEEGOMTYXKY-UHFFFAOYSA-N	O=C(O)C3NCC=2NC1=CC=CC=C1C=2C3	Aleurites|Allium tuberosum|Arabidopsis thaliana|Asterias rollestoni|Cichorium endivia|Citrus limon|Citrus reticulata|Homo sapiens|Rattus norvegicus	Indoles and derivatives	Pyridoindoles	1a	8081	dnp:JPR07|chebi:91151|hmdb:HMDB0035665|knapsack:C00026660|cas:42438-90-4|chemspider:88749|foodb:FDB014381|pmid:10606547|pubchem cid:98285|reaxys registry number:86484	0.1344	0.2605	0.1162	0.0935	0.1099	0.0983	0.0777	0.0758	0.2233	0.1433	0.6272	0.7178	0.7436	0.6364	0.3436	0.4569	0.4739	0.6045
142	pos_344	Simple ID		1	pos	344	8.935	218.102	[M+H]+	generic	C9H15NO5	CJ 15801	5.2079	5.2079	Unknown	3	66	218.102	[M+H]+	217.095	-0.000101	2.982	N-acyl amines	HWKKTJQAKVPKTK-VDOHHYCYNA-N	O=C(O)C=CNC(=O)C(O)C(C)(C)CO						KNApSAcK=C00015152,UNPD=UNPD14826	0.3066	0.2782	0.2897	0.2986	0.3125	0.3449	0.3127	0.3292	0.4002	0.3538	0.3776	0.4256	0.3846	0.4752	0.5024	0.3998	0.3985	0.5224
143	pos_346	Simple ID		1	pos	346	9.863	219.102	[M+H]+	genus	C13H14O3	7-Hydroxy-3,4-dimethyl-2H-1-benzopyran-2-one; Et ether	4.8975	9.795	Unknown	3	92	219.101	[M+H]+	218.094	7.08e-05	3.198		DHCNDDIKPFLNAO-UHFFFAOYSA-N	O=C2OC=1C=C(OCC)C=CC=1C(=C2C)C	Edgeworthia gardneri	Coumarins and derivatives		1b	225914	dnp:GVL08|unpd:UNPD149816|cas:111244-98-5	0.6196	0.4215	0.2569	0.362	0.4313	0.4652	0.3646	0.2332	0.5633	0.3958	0.4713	0.4631	0.3904	0.4385	0.4769	0.4469	0.4004	0.4067
144	pos_356	Simple ID		1	pos	356	14.016	220.082	[M+H]+	Standard	C9H17NOS2	1-Isothiocyanato-7-(methylthio)heptane; S-Oxide	5.4744	10.9488	(IROA) O-SUCCINYL-HOMOSERINE	3	112	220.082	[M+H]+	219.075	0.0001326	3.506		OGYHCBGORZWBPH-UHFFFAOYSA-N	O=S(C)CCCCCCCN=C=S	Sibara	Sulfoxides		1b	22280	dnp:LBC43|chebi:138800|hmdb:HMDB0038441|cas:129244-98-0|chemspider:8013088|foodb:FDB017799|pubchem cid:9837367	0.6732	0.2708	1.08	0.1962	0.1562	0.3641	0.411	0.2869	0.1583	0.4718	0.3714	0.4329	0.4859	0.5407	0.5364	0.3945	0.3463	0.4432
145	pos_357	Simple ID		1	pos	357	9.179	220.137	[M+H]+	genus	C10H21NO2S	(2R)-2-amino-9-(methylsulfanyl)nonanoic acid	5.9944	11.9888	Unknown	3	81	220.137	[M+H]+	219.129	7.64e-05	3.607		GYYOKOIBHIWNHE-UHFFFAOYNA-N	O=C(O)C(N)CCCCCCCSC	Arabidopsis thaliana	Carboxylic acids and derivatives	Amino acids, peptides, and analogues	1a	193578	chebi:134635|knapsack:C00007652|plantcyc:CPDQT-256|pubchem cid:25010767	0.35	0.3006	0.2793	0.0641	0.5319	0.52	0.2677	0.4708	0.27	0.2206	0.1611	0.1558	0.1327	0.1949	0.1579	0.1625	0.1893	0.2052
146	pos_322	Simple ID	Other possible annotated peaks for this cluster.	3	pos	322	8.285	207.065	[M+H-H2O]+	genus	C11H12O5	sinapate	6.4185	12.837	Unknown	3	103	207.065	[M+H-H2O]+	224.068	0.0001853	3.533		PCMORTLOPMLEFB-ONEGZZNKSA-M	O=C([O-])C=CC=1C=C(OC)C(O)=C(OC)C=1	Aegilops tauschii|Anacardium occidentale|Ananas comosus|Aquilegia coerulea|Arabidopsis thaliana|Asparagus officinalis|Boechera stricta|Brassica napus|Brassica rapa|Camptotheca acuminata|Citrus|Corchorus capsularis|Cucumis sativus|Daucus carota|Dianthus caryophyllus|Dioscorea|Eutrema salsugineum|Gossypium raimondii|Hordeum vulgare|Humulus lupulus|Kalanchoe fedtschenkoi|Kalanchoe laxiflora|Linum us…	Cinnamic acids and derivatives	Hydroxycinnamic acids and derivatives	1a	23139	chebi:30023|hmdb:HMDB32616|plantcyc:SINAPATE|cas:530-59-6|chemspider:4573878|kegg ligand:C00482|nci:59261|pubchem cid:5460292|refmet:Sinapic acid	0.1078	0.1077	0.0798	0.0852	0.0969	0.1016	0.0761	0.0792	0.1022	0.0954	0.5697	0.5082	0.6064	0.6621	0.5819	0.6763	0.5491	0.5694
147	neg_284	Simple ID		17	neg	284	8.736	385.114	[M-H]-	genus	C17H22O10	1-O-sinapoyl-?-D-glucose	6.7704	13.5408	Unknown	3	11	385.114	[M-H]-	386.121	2.05e-05	3.931		XRKBRPFTFKKHEF-DXXRHYKQNA-N	O=C(OC1OC(CO)C(O)C(O)C1(O))C=CC=2C=C(OC)C(O)=C(OC)C=2	Arabidopsis thaliana	Cinnamic acids and derivatives	Hydroxycinnamic acids and derivatives	1a	197756	knapsack:C00013592|cas:14364-09-1	41.0576	45.7239	45.5694	27.9907	66.6411	59.9372	51.4844	69.5646	25.723	49.0353	15.3986	14.8194	13.1882	12.1941	17.1723	16.9828	19.53	6.1728
148	neg_285	Simple ID		9	neg	285	8.88	385.114	[M-H]-	genus	C17H22O10	1-O-sinapoyl-?-D-glucose	6.5356	13.0712	Unknown	3	11	385.114	[M-H]-	386.121	-7.95e-05	3.684		XRKBRPFTFKKHEF-DXXRHYKQNA-N	O=C(OC1OC(CO)C(O)C(O)C1(O))C=CC=2C=C(OC)C(O)=C(OC)C=2	Arabidopsis thaliana	Cinnamic acids and derivatives	Hydroxycinnamic acids and derivatives	1a	197756	knapsack:C00013592|cas:14364-09-1	10.2258	10.6615	10.9458	7.5384	16.1403	14.049	12.3933	16.7183	5.6977	11.3814	4.435	4.1046	3.4592	3.3502	4.5682	4.3016	5.2845	1.5626
149	pos_372	Simple ID		1	pos	372	5.946	226.071	[M+H]+	genus	C10H11NO5	2-{[(1R,6R)-6-amino-3-carboxycyclohexa-2,4-dien-1-yl]oxy}prop-2-enoate	6.2291	12.4582	Unknown	3	79	226.071	[M+H]+	225.064	9.89e-05	3.577		OIUJHGOLFKDBSU-HTQZYQBOSA-M	O=C([O-])C(OC1C=C(C=CC1(N))C(=O)O)=C	Aegilops tauschii|Ananas comosus|Aquilegia coerulea|Arabidopsis halleri|Asparagus officinalis|Beta vulgaris|Brachypodium distachyon|Brassica napus|Brassica rapa|Calotropis gigantea|Capsella grandiflora|Capsicum annuum|Carica papaya|Catharanthus roseus|Coccomyxa|Corchorus capsularis|Cucumis sativus|Daucus carota|Eutrema salsugineum|Gossypium raimondii|Helianthus annuus|Hordeum vulgare|Kalanchoe la…	Carboxylic acids and derivatives	Dicarboxylic acids and derivatives	1a	20944	chebi:58406|plantcyc:4-AMINO-4-DEOXYCHORISMATE|bigg:214284|cas:97279-79-3|kegg ligand:C11355|pubchem cid:25244713	1.2735	1.2454	0.7335	0.9185	1.0044	0.9133	0.7368	0.5653	1.4166	1.0429	0.2178	0.2167	0.2292	0.2486	0.2201	0.2834	0.2438	0.2871
150	pos_635	Double ID		5	pos	635	8.178	395.131	[M+Na]+	genus	C17H24O9	(2S,3R,4S,5R,6S)-2-(hydroxymethyl)-6-({4-[(1E)-3-hydroxyprop-1-en-1-yl]-2,6-dimethoxyphenylidene}oxy)oxane-3,4,5-triol	4.5377	9.0754	Unknown	3	19	395.131	[M+Na]+	372.142	0.000253	3.068		QJVXKWHHAMZTBY-MAWHBGBXNA-N	OCC=CC=2C=C(OC)C(OC1OC(CO)C(O)C(O)C1(O))=C(OC)C=2	Anethum graveolens|Arabidopsis thaliana|Artemisia minor|Atractylodes lancea|Carum carvi|Chrozophora|Codonopsis pilosula|Cuscuta reflexa|Daphne feddei|Daphne oleoides|Eucommia ulmoides|Euodia|Foeniculum vulgare|Fraxinus griffithii|Fraxinus stylosa|Gnidia polycephala|Ilex chinensis|Jasminum nudiflorum|Linaria vulgaris|Lindera|Magnolia grandiflora|Magnolia obovata|Magnolia officinalis|Magnolia siebo…	Organooxygen compounds	Carbohydrates and carbohydrate conjugates	1a	175692	chebi:9380|knapsack:C00000010|plantcyc:CPD-63|unpd:UNPD102248|cas:118-34-3|foodb:FDB011657|nanpdb:NANPDB_16|pubchem cid:12443176	0	0	0.0049	0.0033	0	0	0.0066	0	0	0	0.463	0.3829	0.3263	0.4356	0.5977	0.4364	0.3407	0.555
151	pos_383	Unknown compound		1	pos	383	14.226	230.248	[M+H]+	Unknown																						0.3033	0.3377	0.2844	0.3653	0.3062	0.2651	0.3236	0.1929	0.3654	0.2958	0.2529	0.2162	0.2163	0.2543	0.2843	0.2987	0.2984	0.1926
152	pos_384	Unknown compound		1	pos	384	15.032	230.248	[M+H]+	Unknown																						0.0979	0.0684	0.0396	0.1108	0.0564	0.0591	0.1978	0.084	0.2252	0.1506	1.6329	0.046	0.0342	0.0719	0.0864	0.0384	0.1277	0.1081
153	pos_396	Simple ID	Other possible annotated peaks for this cluster.	3	pos	396	15.182	234.098	[M+H]+	genus	C10H19NOS2	1-Isothiocyanato-8-(methylthio)octane; S-Oxide(R-)	5.5592	11.1184	Unknown	3	136	234.098	[M+H]+	233.091	0.0001827	3.491		BCRXKWOQVFKZAG-UHFFFAOYSA-N	O=S(C)CCCCCCCCN=C=S	Arabidopsis thaliana|Arabis hirsuta|Diplotaxis harra|Erucaria microcarpa|Rorippa indica|Rorippa sylvestris|Sibara	Sulfoxides		1a	1729	dnp:JVF78|chebi:91152|hmdb:HMDB0035923|knapsack:C00000138|cas:31456-68-5|chemspider:7970426|foodb:FDB014717|pmid:10404541|pubchem cid:9794659|reaxys registry number:1708483	6.5982	2.5134	10.4004	1.4749	1.299	3.3662	4.7628	3.1607	1.4041	4.1312	3.5798	4.2694	5.311	5.4714	4.8231	3.8334	3.7197	4.311
154	pos_552	Unknown compound		5	pos	552	14.797	329.053	[M+Na]+	Unknown																						0.0667	0.0421	0.0749	0.0356	0.0908	0.1681	0.0703	0.145	0.1683	0.0818	0.0094	0.0648	0.108	0.202	0.0634	0.0447	0.2978	7.2199
155	pos_399	Unknown compound		2	pos	399	11.501	236.086	[M+H]+	Unknown																						0.1066	0.113	0.0805	0.1302	0.0971	0.109	0.1119	0.0743	0.1275	0.1016	0.0163	0.0297	0.0227	0.0275	0.0505	0.0063	0.0548	0.0056
156	pos_404	Simple ID		1	pos	404	6.694	240.05	[M+H]+	generic	C10H9NO6	2-{[hydroxy(6-hydroxy-2H-1,3-benzodioxol-5-yl)methylidene]amino}acetic acid	6.4513	6.4513	Unknown	3	37	240.05	[M+H]+	239.043	-3.65e-05	3.944	N-acyl-alpha amino acids	BSGZBTVJZSNKKJ-UHFFFAOYSA-N	O=C(O)CN=C(O)C1=CC=2OCOC=2(C=C1(O))						HMDB=HMDB0129401	1.2138	1.2086	1.4537	1.4872	1.2093	1.2217	1.028	1.0303	1.4919	1.088	0.7085	0.7295	0.6107	0.7426	0.616	0.8767	0.9608	0.7085
157	pos_293	Simple ID	Other possible annotated peaks for this cluster.	5	pos	293	6.798	195.123	[M+H]+	generic	C8H18O5	Tetraethylene glycol	5.3503	5.3503	Unknown	3	54	195.123	[M+H]+	194.115	1e-07	3.054	Polyethylene glycols	UWHCKJMYHZGTIT-UHFFFAOYSA-N	OCCOCCOCCOCCO						HMDB=HMDB0094708,ChEBI=CHEBI:44920,T3DB=T3D4801,STOFF=STOFF_58,Feces=HMDB0094708,UNPD=UNPD121889,BLEXP=BLEXPDB00000008200	2.3818	2.4351	1.5915	1.6493	10.738	1.4942	1.8892	1.6775	4.0137	4.4594	2.8442	1.6778	2.3457	1.6726	5.9165	1.5528	1.7984	1.3936
158	pos_408	Simple ID		1	pos	408	1.382	244.093	[M+H]+	Standard	C9H13N3O5	cytidine	5.2623	10.5246	(IROA) CYTIDINE	3	102	244.093	[M+H]+	243.086	-3e-06	4.007		UHDGCWIWMRVCDJ-XVFCMESISA-N	N=C1N=C(O)N(C=C1)C2OC(CO)C(O)C2(O)	Anacardium occidentale|Ananas comosus|Aquilegia coerulea|Arabidopsis halleri|Asparagus officinalis|Beta vulgaris|Boechera stricta|Brassica napus|Brassica rapa|Capsella rubella|Capsicum annuum|Catharanthus roseus|Citrus|Coccomyxa|Corchorus capsularis|Daucus carota|Dioscorea|Escherichia coli|Eutrema salsugineum|Glycine max|Gossypium raimondii|Homo sapiens|Humulus lupulus|Kalanchoe fedtschenkoi|Linu…	Pyrimidine nucleosides		1a	41091	chebi:17562|hmdb:HMDB0000089|plantcyc:CYTIDINE|unpd:UNPD35065|beilstein registry number:89173|bigg:cytd|cas:65-46-3|chemspider:5940|drugbank:DB00987|foodb:FDB001979|gmelin registry number:84763|kegg compounds:C02961|kegg drug:D07769|kegg ligand:C00475|metabolights:MTBLC17562|metacyc:CYTIDINE|pdb:AR3|pmid:10333125|pubchem cid:6175|reaxys registry number:89173|refmet:Cytidine|wikipedia:Cytarabine	0.8409	0.8357	0.9297	0.6699	0.6798	0.758	0.6463	0.7672	0.7894	0.8159	0.7416	0.7303	0.7887	0.8925	0.9289	0.8898	0.8708	0.8241
159	pos_412	Unknown compound		1	pos	412	1.367	247.042	[M+H]+	Unknown																						0.5498	0.5616	0.6434	0.6844	0.5894	0.5935	0.5671	0.5727	0.6589	0.8983	0.0726	0.0565	0.0335	0.067	0.052	0.0751	0.0594	0.0528
160	pos_413	Simple ID		1	pos	413	1.231	247.058	[M+H]+	generic	C6H15O8P	glycerophosphoglycerol	6.3731	6.3731	Unknown	3	87	247.058	[M+H]+	246.05	-6.95e-05	3.421	Dialkyl phosphates	LLCSXHMJULHSJN-UHFFFAOYNA-N	O=P(O)(OCC(O)CO)OCC(O)CO						ChEBI=CHEBI:5457;CHEBI:61933;CHEBI:64717;CHEBI:64956;CHEBI:84515;CHEBI:85411,PlantCyc=GLYCEROPHOSPHOGLYCEROL,BLEXP=BLEXPDB00000439964	0.8196	0.6172	0.9386	0.6724	0.7239	0.801	0.6703	0.8109	0.9417	1.1319	0.1791	0.1478	0.1424	0.1289	0.2249	0.1689	0.1998	0.1667
161	pos_418	Simple ID		1	pos	418	8.026	249.087	[M+H]+	generic	C12H12N2O4	5-Hydroxyindoleacetylglycine	6.7727	6.7727	Unknown	3	77	249.087	[M+H]+	248.08	0.0001833	3.603	N-acyl-alpha amino acids	LFUCRBSGQMAKCO-UHFFFAOYSA-N	O=C(O)CNC(=O)CC2=CNC=1C=CC(O)=CC=12						HMDB=HMDB0004185,FooDB=FDB023328,BMDB=BMDB04185,PubChem=440806	1.0439	0.686	0.2514	0.3724	0.5438	0.4985	0.2854	0.1985	0.4462	0.3025	0.2844	0.3163	0.321	0.254	0.2742	0.3184	0.3586	0.3062
162	pos_673	Double ID		4	pos	673	10.102	441.137	[M+Na]+	genus	C18H26O11	2-(Hydroxymethyl)-1,2,3,4-butanetetrol; 4-O-(6-O-Benzoyl-?-D-glucopyranoside)	7.0945	14.189	Unknown	3	24	441.137	[M+Na]+	418.148	3.24e-05	4.576		MFDGFQVXXOUXFY-UHFFFAOYSA-N	O=C(OCC1OC(OCC(O)C(O)(CO)CO)C(O)C(O)C1(O))C2=CC=CC=C2	Casearia velutina	Fatty Acyls	Fatty acyl glycosides	1b	969201	dnp:QJL09	0.1418	0.1008	0.0513	0.0803	0.0972	0.1393	0.1127	0.0876	0.1614	0.1023	1.8698	1.7508	1.7962	1.8946	2.3807	2.8522	1.7245	1.9083
163	neg_244	Simple ID	Other possible annotated peaks for this cluster.	5	neg	244	1.182	333.059	[M-H]-	genus	C9H19O11P	(2R)-2,3-dihydroxypropoxy([(1S,2R,3R,4S,5S,6R)-2,3,4,5,6-pentahydroxycyclohexyl]oxy)phosphinic acid	6.8749	13.7498	Unknown	3	6	333.059	[M-H]-	334.066	-0.0001784	4.555		BMVUIWJCUQSHLZ-UJGXJMNGSA-N	O=P(O)(OCC(O)CO)OC1C(O)C(O)C(O)C(O)C1(O)	Arabidopsis thaliana|Daphnia|Escherichia coli	Glycerophospholipids	Glycerophosphoinositols	1a	2383	chebi:18321|hmdb:HMDB0011649|unpd:UNPD171337|bmdb:BMDB11649|cas:129830-95-1|chemspider:28184592|foodb:FDB011624|kegg compounds:C01225|metacyc:CPD-541|pmid:11413487|pubchem cid:45480544|reaxys registry number:3219210|ymdb:YMDB00781	26.0506	21.3432	25.681	24.3827	23.4618	21.2505	20.6839	17.0718	29.8308	28.6791	5.9417	4.934	5.2128	5.0332	6.6507	5.5315	6.4055	6.124
164	neg_133	Simple ID	Other possible annotated peaks for this cluster.	10	neg	133	15.116	239.06	[M-H]-	generic	C9H20OS3	Propyl 1-(propylsulfinyl)propyl disulfide	5.6514	5.6514	Unknown	3	6	239.06	[M-H]-	240.068	0.0004518	3.232	Sulfoxides	NIBWKLISDHVING-UHFFFAOYNA-N	O=S(CCC)C(CC)SSCCC						HMDB=HMDB0033071,FooDB=FDB011065	4.4402	2.6102	5.9156	4.6958	0.5755	4.2206	4.5086	3.6173	4.5865	5.3294	0.9387	2.0934	1.5505	2.2095	0.4526	3.3914	1.8723	2.1335
165	pos_422	Simple ID		1	pos	422	7.432	250.147	[M+H]+	genus	C11H23NO3S	hexahomomethionine S-oxide	5.718	11.436	Unknown	3	77	250.147	[M+H]+	249.14	4.1e-05	3.391		QRXRWDDFTQIZAV-UHFFFAOYSA-N	O=C(O)C(N)CCCCCCCCS(=O)C	Arabidopsis thaliana	Carboxylic acids and derivatives	Amino acids, peptides, and analogues	1a	48615	chebi:91226|pmid:25457500|reaxys registry number:28063957	0.0692	0.0626	0.036	0.0322	0.069	0.0752	0.0409	0.0713	0.0607	0.0409	0.3748	0.3769	0.3306	0.3915	0.4869	0.2921	0.4581	0.2945
166	pos_209	Simple ID	Other possible annotated peaks for this cluster.	3	pos	209	5.866	166.086	[M+H]+	Standard	C9H11NO2	Phenylalanine|Phenylalanine; (R)-form|Phenylalanine; (S)-form|Phenylalanine; (?)-form	6.3449	12.6898	(IROA) PHENYLALANINE	3	73	166.086	[M+H]+	165.079	0.000155	3.692		COLNVLDHVKWLRT-UHFFFAOYSA-N	O=C(O)C(N)CC1=CC=CC=C1	Arabidopsis thaliana|Astragalus mongholicus|Brassica napus|Caenorhabditis elegans|Cichorium intybus|Crocus sativus|Daphnia|Homo sapiens|Lactuca sativa|Mus|Nicotiana attenuata|Oryza sativa|Panax ginseng|Photinus pyralis|Populus deltoides|Pseudomonas putida|Rattus norvegicus|Ruegeria pomeroyi|Saccharomyces cerevisiae|Salmonella enterica|Schizosaccharomyces pombe|Sea|Solanum|Synechococcus elongatus	Carboxylic acids and derivatives	Amino acids, peptides, and analogues	1a	4612	dnp:HQC15|beilstein registry number:1910407|cas:150-30-1|gmelin registry number:50836|pmid:17439666|reaxys registry number:1910407|wikipedia:Phenylalanine	7.5649	7.8584	6.0782	7.7459	6.0387	7.2719	5.6653	4.4214	8.388	8.4484	23.0869	27.4214	24.1979	21.4152	26.0785	18.9856	20.5843	22.421
167	pos_37	Simple ID	Other possible annotated peaks for this cluster.	2	pos	37	1.395	118.123	[M+H]+	genus	C6H15NO	2-Aminoethanol; N,N-Di-Et	4.2295	8.459	Unknown	3	37	118.123	[M+H]+	117.115	4.06e-05	3.245		BFSVOASYOCHEOV-UHFFFAOYSA-N	OCCN(CC)CC		Organonitrogen compounds	Amines	1b	1895	dnp:HFB70|chebi:52153|hmdb:HMDB0033971|unpd:UNPD102755|beilstein registry number:741863|cas:100-37-8|chemspider:13842001|foodb:FDB012202|pmid:12388211|pubchem cid:7497|reaxys registry number:741863|stoff:STOFF_135|wikipedia:2-Diethylaminoethanol	0.1819	0.2043	0.177	0.2105	0.4274	0.2177	0.1814	0.1608	0.2744	0.2369	0.5741	0.4176	0.5432	0.4848	0.6234	0.5187	0.4358	0.4531
168	pos_448	Simple ID		1	pos	448	1.202	265.023	[M-C6H10O4]+	generic	C10H17N7O9S	Gonyautoxin I	6.0783	6.0783	Unknown	3	89	265.023	[M-C6H10O4]+	411.081	-0.0006113	3.62	Saxitoxins, gonyautoxins, and derivatives	CETRDCWBMBILAL-UHFFFAOYNA-N	O=C(OCC1N(O)C(=N)N3CC(OS(=O)(=O)O)C(O)(O)C23(NC(=N)NC12))N						HMDB=HMDB0033506;HMDB0033508,ChEBI=CHEBI:80768,T3DB=T3D4038,FooDB=FDB011559;FDB011561,STOFF=STOFF_8437,UNPD=UNPD137088;UNPD14779;UNPD156855;UNPD181371;UNPD190264	1.3868	1.0387	1.4752	0.9031	1.0165	0.8587	1.1418	0.9027	1.3358	1.4574	0.9811	0.645	0.7286	0.7251	0.7516	0.8958	0.7419	0.7665
169	pos_452	Simple ID		1	pos	452	5.457	268.104	[M+H]+	Standard	C10H13N5O4	(2R,3S,4R,5S)-2-(6-aminopurin-9-yl)-5-(hydroxymethyl)oxolane-3,4-diol	8.4451	16.8902	(IROA) ADENOSINE	3	34	268.104	[M+H]+	267.097	0.0001303	5.219		OIRDTQYFTABQOQ-CDACIVGJNA-N	OCC3OC(N2C=NC1=C(N=CN=C12)N)C(O)C3(O)	Acanthus ebracteatus|Acanthus ilicifolius|Adiantum lunulatum|Allium tuberosum|Arabidopsis thaliana|Atractylodes lancea|Capparis flavicans|Cassytha filiformis|Citrus|Codonopsis|Crocus sativus|Cucumis sativus|Dioscorea|Fritillaria cirrhosa|Gastrodia elata|Junceella juncea|Oxytropis myriophylla|Strychnos lucida|Subergorgia suberosa|Zea mays			1a	134514	knapsack:C00007444|cas:58-61-7	12.8705	6.9085	13.6007	6.8667	5.5134	6.7847	7.8142	5.8728	6.8145	8.7714	4.7651	3.9085	4.8555	4.1469	3.9202	4.1659	4.2586	3.9544
170	pos_462	Simple ID		1	pos	462	15.592	272.258	[M+H]+	genus	C16H33NO2	2-Amino-4-hexadecene-1,3-diol|2-Amino-4-hexadecene-1,3-diol; (2R,3S,4E)-form|2-Amino-4-hexadecene-1,3-diol; (2S,3R,4E)-form	5.7794	11.5588	Unknown	3	53	272.258	[M+H]+	271.251	5.7e-06	3.243		BTUSGZZCQZACPT-OUKQBFOZSA-N	OCC(N)C(O)C=CCCCCCCCCCCC	Musca domestica	Organonitrogen compounds	Amines	1b	913254	dnp:JFB37	0.3404	0.4313	0.3903	0.4097	0.3933	0.3519	0.3379	0.3819	0.4229	0.4945	0.6887	0.4602	0.453	0.704	0.4259	0.2597	0.5175	0.2635
171	pos_472	Simple ID		1	pos	472	7.675	277.166	[M+H]+	generic	C14H20N4O2	4-Hydroxycinnamoylagmatine	7.1066	7.1066	Unknown	3	66	277.166	[M+H]+	276.159	0.0001023	3.267	Coumaric acids and derivatives	AKIHYQWCLCDMMI-VMPITWQZSA-N	O=C(C=CC1=CC=C(O)C=C1)NCCCCNC(=N)N						HMDB=HMDB0033460,KNApSAcK=C00028060,ChEBI=CHEBI:32818;CHEBI:58644;CHEBI:86078;CHEBI:86080;CHEBI:86083;CHEBI:86085,FooDB=FDB011502,PubChem=25245514;5280691,PlantCyc=N-4-GUANIDINOBUTYL-4-HYDROXYCINNAMAMID,UNPD=UNPD159410;UNPD99005	0.7135	0.4101	0.0634	0.2948	0.1145	0.1846	0.472	0.0299	0.2459	0.0739	0.476	0.5264	0.3502	0.3841	0.41	0.5594	0.504	0.518
172	pos_473	Simple ID		1	pos	473	8.179	277.166	[M+H]+	generic	C14H20N4O2	4-Hydroxycinnamoylagmatine	6.9598	6.9598	Unknown	3	61	277.166	[M+H]+	276.159	0.0001023	3.044	Coumaric acids and derivatives	AKIHYQWCLCDMMI-VMPITWQZSA-N	O=C(C=CC1=CC=C(O)C=C1)NCCCCNC(=N)N						HMDB=HMDB0033460,KNApSAcK=C00028060,ChEBI=CHEBI:32818;CHEBI:58644;CHEBI:86078;CHEBI:86080;CHEBI:86083;CHEBI:86085,FooDB=FDB011502,PubChem=25245514;5280691,PlantCyc=N-4-GUANIDINOBUTYL-4-HYDROXYCINNAMAMID,UNPD=UNPD159410;UNPD99005	0.2551	0.1645	0.0309	0.1314	0.0458	0.0896	0.1598	0.0224	0.1377	0.0437	0.6044	0.7183	0.4683	0.3862	0.6023	0.7047	0.9008	0.4623
173	pos_478	Unknown compound		1	pos	478	12.746	279.117	[M+H]+	Unknown																						1.0779	0.0458	1.3592	0.0225	0.0081	0.0509	0	0.0259	0.1905	0.4388	0	0	0	0	0	0	0	0
174	pos_487	Simple ID		1	pos	487	5.502	284.099	[M+H]+	Standard	C10H13N5O5	Isoguanosine	6.4571	12.9142	(IROA) GUANOSINE	3	26	284.099	[M+H]+	283.092	4.5e-05	3.859		MIKUYHXYGGJMLM-UHFFFAOYSA-N	OC1=NC(N)=C2N=CN(C2(=N1))C3OC(CO)C(O)C3(O)	Croton tiglium|Diaulula sandiegensis	Purine nucleosides		1b	944205	dnp:BVP02	0.7002	0.4625	0.7172	0.4919	0.3914	0.4147	0.496	0.3221	0.4652	0.5309	0.532	0.4553	0.441	0.5332	0.4425	0.4628	0.4785	0.4892
175	pos_488	Simple ID		1	pos	488	14.819	284.127	[M+H]+	generic	C17H17NO3	N-(p-Hydroxyphenyl)ethyl p-hydroxycinnamide	5.9314	5.9314	Unknown	3	128	284.127	[M+H]+	283.121	0.0008199	3.15	Coumaric acids and derivatives	RXGUTQNKCXHALN-BJMVGYQFSA-N	O=C(C=CC1=CC=C(O)C=C1)NCCC2=CC=C(O)C=C2						HMDB=HMDB0039521,KNApSAcK=C00027418;C00028801;C00034085,ChEBI=CHEBI:65665,FooDB=FDB004679;FDB019132;FDB020357;FDB031080,PubChem=5372945,PlantCyc=CPD-8943,UNPD=UNPD127539;UNPD41257;UNPD213692,BLEXP=BLEXPDB00000089322	0.6999	0.3463	0.3229	0.1577	0.107	0.1719	0.1277	0.0873	0.4305	0.3256	0.0119	0.0217	0.0364	0.0495	0.0669	0	0.0521	0.0066
176	pos_443	Unknown compound		6	pos	443	7.445	261.131	[M+Na]+	Unknown																						1.5872	1.3139	1.1006	1.2397	7.7705	1.0216	1.3885	1.0003	3.0957	2.1085	1.9593	1.1281	1.1226	1.0648	2.2728	1.4954	0.9727	0.932
177	pos_490	Simple ID		1	pos	490	6.033	286.092	[M+H]+	generic	C12H15NO7	Buchananine	5.8048	5.8048	Unknown	3	28	286.092	[M+H]+	285.085	0.0001283	3.162	Pyridinecarboxylic acids	ASJDJBXXEHTEBW-UNIKAPENNA-N	O=C(OCC1OC(O)C(O)C(O)C1(O))C=2C=NC=CC=2						KNApSAcK=C00002025,ChEBI=CHEBI:3202,UNPD=UNPD107750	0.061	0.0571	0.0282	0.0417	0.0487	0.0576	0.0038	0.0249	0.034	0.0348	2.1463	1.8797	1.6139	1.8011	2.2655	1.7389	1.9612	1.7611
178	pos_492	Simple ID		1	pos	492	5.291	286.092	[M+H]+	generic	C12H15NO7	Buchananine	7.4444	7.4444	Unknown	3	33	286.092	[M+H]+	285.085	2.83e-05	4.271	Pyridinecarboxylic acids	ASJDJBXXEHTEBW-UNIKAPENNA-N	O=C(OCC1OC(O)C(O)C(O)C1(O))C=2C=NC=CC=2						KNApSAcK=C00002025,ChEBI=CHEBI:3202,UNPD=UNPD107750	0.0118	0.0191	0.0058	0.0222	0.0144	0.0086	0.0029	0.0037	0.0036	0.0215	0.9845	0.8527	0.7245	0.8014	0.9365	0.6977	0.8424	0.7003
179	pos_500	Simple ID	Other possible annotated peaks for this cluster.	2	pos	500	7.555	298.097	[M+H]+	Standard	C11H15N5O3S	5-methylthioadenosine	6.7069	13.4138	(IROA) METHYLTHIOADENOSINE	3	38	298.097	[M+H]+	297.09	0.0002368	4.056		WUUGFSXJNOTRMR-IOSLPCCCSA-N	OC3C(O)C(OC3(N2C=NC1=C(N=CN=C12)N))CSC	Aegilops tauschii|Ananas comosus|Aquilegia coerulea|Arabidopsis halleri|Asparagus officinalis|Brassica rapa|Capsella grandiflora|Capsicum annuum|Carica papaya|Catharanthus roseus|Citrus|Coccomyxa|Corchorus capsularis|Cucumis sativus|Daucus carota|Dianthus caryophyllus|Escherichia coli|Eutrema salsugineum|Glycine max|Gossypium raimondii|Helianthus annuus|Homo sapiens|Kalanchoe laxiflora|Leersia pe…	5'-deoxyribonucleosides	5'-deoxy-5'-thionucleosides	1a	43824	chebi:17509|hmdb:HMDB0001173|npatlas:NPA008075|plantcyc:5-METHYLTHIOADENOSINE|unpd:UNPD190794|bigg:34127|bmdb:BMDB01173|cas:2457-80-9|chemspider:388321|drugbank:DB02282|foodb:FDB022465|kegg compounds:C00170|kegg ligand:C00170|metabolights:MTBLC17509|metacyc:5-METHYLTHIOADENOSINE|metlin:3425|pdb:MTA|pmid:12244041|pubchem cid:439176|reaxys registry number:42420|refmet:5'-Methylthioadenosine|smpdb:P…	1.2303	1.4626	1.4532	1.204	1.5628	1.4597	1.2613	1.518	1.2603	1.187	1.0695	1.0363	1.1006	0.9815	1.1912	1.023	1.0328	1.0709
180	pos_508	Simple ID		1	pos	508	7.052	302.196	[M+H]+	generic	C15H27NO5	Floridimine	6.3091	6.3091	Unknown	3	51	302.196	[M+H]+	301.189	9.94e-05	3.493	Pyrrolizidines	QRVKSRGLONTBPX-VTTZNTHLNA-N	O=C(OCC2CCN1CCCC12)C(O)(C(O)C)C(O)(C)C						KNApSAcK=C00026191;C00026193,UNPD=UNPD131754;UNPD149260	0.4763	0.7645	0.565	0.3879	0.4794	0.5107	0.5576	0.5291	0.5844	0.7124	0.6862	0.7927	0.6588	0.8263	0.78	0.7442	0.7216	0.6458
181	pos_517	Unknown compound		1	pos	517	6.329	306.1	[M+H]+	Unknown																						0	0	0	0	0	0	0	0	0	0	0.8311	0.6541	0.5163	0.6033	0.7792	0.6113	0.6693	0.6163
182	pos_520	Simple ID		1	pos	520	1.913	308.091	[M+H]+	Standard	C10H17N3O6S	glutathione	7.3288	14.6576	(IROA) GLUTATHIONE REDUCED	3	66	308.091	[M+H]+	307.084	8.27e-05	4.217		RWSXRVCMGQZWBV-IOMOGOHMNA-N	O=C(O)CN=C(O)C(N=C(O)CCC(N)C(=O)O)CS	Arabidopsis thaliana|Escherichia coli|Vicia faba			1a	173046	knapsack:C00001518|cas:70-18-8	0.342	0.7033	0.3212	1.2073	0.2944	0.8728	1.0464	0.78	1.071	0.6417	0.1612	0.1727	0.1344	0.1617	0.1503	0.2637	0.2137	0.1913
183	pos_524	Unknown compound		2	pos	524	6.411	313.089	[M+H]+	Unknown																						0	0	0	0	0	0	0	0	0	0	0.4162	0.3945	0.3408	0.4308	0.5107	0.3914	0.3984	0.4017
184	pos_128	Simple ID		7	pos	128	6.006	146.063	[M+H]+	genus	C6H11NOS	5-[(R)-methanesulfinyl]pentanenitrile	5.0441	10.0882	Unknown	3	39	146.063	[M+H]+	145.056	1.14e-05	3.54		FGYQUFZANKOISC-UHFFFAOYNA-N	N#CCCCCS(=O)C	Arabidopsis thaliana	Sulfoxides		1a	164968	knapsack:C00007667|unpd:UNPD220135	10.4127	7.3516	11.9081	4.6516	16.5421	18.545	6.3464	9.4255	10.6314	16.285	4.9124	4.0902	4.5019	4.7266	4.7925	5.9771	3.8517	4.8701
185	pos_527	Unknown compound		2	pos	527	7.76	316.212	[M+H]+	Unknown																						0.9072	0.8259	0.6137	0.7567	0.6194	0.5364	0.5789	0.5056	0.9637	0.7474	0.5174	0.4222	0.3973	0.447	0.4586	0.4584	0.4148	0.3949
186	pos_528	Unknown compound		1	pos	528	8.225	316.212	[M+H]+	Unknown																						1.065	1.0869	1.0971	1.0179	1.1068	0.9458	0.9006	0.8788	1.275	1.2334	1.1345	0.9838	0.8469	1.1717	1.0438	0.8962	0.8948	0.9096
187	pos_532	Unknown compound		1	pos	532	7.205	319.136	[M+H]+	Unknown																						0.4802	0.4473	0.3574	0.4349	0.3966	0.449	0.434	0.2837	0.6382	0.6312	0.1979	0.1313	0.0798	0.1256	0.1347	0.1236	0.1334	0.204
188	pos_538	Unknown compound		1	pos	538	1.898	324.093	[M+H]+	Unknown																						0.1876	0.2348	0.0162	0.2286	0.1402	1.1329	0.0937	0.0501	0.1607	0.0299	0	0	0	0	0	0	0	0
189	pos_545	Simple ID		2	pos	545	16.621	325.238	[M+H]+	genus	C19H32O4	Gingerdiols; [8]-Gingerdiol	5.4949	10.9898	Unknown	3	110	325.238	[M+H]+	324.23	-0.000164	3.476		RLBBNYBPCMIQMG-UHFFFAOYSA-N	OC=1C=CC(=CC=1(OC))CCC(O)CC(O)CCCCCCC		Phenols	Methoxyphenols	1b	1077703	dnp:LMC86	0.1797	0.1053	0.2671	0.0325	0.0457	0.0704	0.0574	0.07	0.5066	0.3352	0.0663	0.0296	0.0597	0.0189	0.0336	0.0351	0.0173	0.0238
190	pos_485	Simple ID	Other possible annotated peaks for this cluster.	4	pos	485	7.926	283.175	[M+H]+	generic	C12H26O7	Hexaethylene glycol	6.9384	6.9384	Unknown	3	52	283.175	[M+H]+	282.168	2.96e-05	3.875	Polyethylene glycols	IIRDTKBZINWQAW-UHFFFAOYSA-N	OCCOCCOCCOCCOCCOCCO						HMDB=HMDB0061822,ChEBI=CHEBI:49793,Saliva=HMDB0061822,Feces=HMDB0061822,BLEXP=BLEXPDB00000017472	0.4294	0.4078	0.3689	0.3736	1.9491	0.2665	0.3383	0.3113	0.592	0.4136	0.3928	0.2838	0.2826	0.2928	0.3804	0.3896	0.2827	0.2902
191	pos_553	Unknown compound		1	pos	553	14.515	329.28	[M+H]+	Unknown																						0.3679	0.4637	0.1169	0.1311	0.2261	0.1084	0.0921	0.1192	0.1096	0.1572	0.1977	0.1284	0.1005	0.1686	0.4635	0.085	0.1685	0.065
192	pos_555	Simple ID		1	pos	555	3.31	332.134	[M+H]+	generic	C14H21NO8	Zinolol	6.9639	6.9639	Unknown	3	47	332.134	[M+H]+	331.127	0.0002931	3.954	Phenolic glycosides	XDRANPRXTFIDRB-PPTNFGOFNA-N	OC=2C=C(OC1OC(CO)C(O)C(O)C1(O))C(O)=C(C=2)CNC						KNApSAcK=C00032550,ChEBI=CHEBI:66506,NANPDB=NANPDB_3410;NANPDB_3411,UNPD=UNPD105633	0.0373	0.0499	0.0341	0.0173	0.0586	0.0412	0.0355	0.0173	0.0498	0.0149	1.2094	1.0835	1.196	0	1.4319	0	1.2872	1.1746
193	pos_558	Simple ID		1	pos	558	5.024	332.134	[M+H]+	generic	C14H21NO8	Zinolol	6.8713	6.8713	Unknown	3	52	332.134	[M+H]+	331.127	-6.9e-06	3.819	Phenolic glycosides	XDRANPRXTFIDRB-PPTNFGOFNA-N	OC=2C=C(OC1OC(CO)C(O)C(O)C1(O))C(O)=C(C=2)CNC						KNApSAcK=C00032550,ChEBI=CHEBI:66506,NANPDB=NANPDB_3410;NANPDB_3411,UNPD=UNPD105633	0	0.0031	0	0	0	0	0	0	0	0	0.6037	0.5779	0.5706	0.6102	0.6325	0.5771	0.6147	0.5765
194	pos_559	Simple ID		1	pos	559	3.384	332.134	[M+H]+	generic	C14H21NO8	Zinolol	7.0819	7.0819	Unknown	3	45	332.134	[M+H]+	331.127	-6.9e-06	3.969	Phenolic glycosides	XDRANPRXTFIDRB-PPTNFGOFNA-N	OC=2C=C(OC1OC(CO)C(O)C(O)C1(O))C(O)=C(C=2)CNC						KNApSAcK=C00032550,ChEBI=CHEBI:66506,NANPDB=NANPDB_3410;NANPDB_3411,UNPD=UNPD105633	0.0467	0.0499	0.0341	0.0173	0.0586	0.0423	0.033	0.0322	0.0498	0.0577	1.2094	1.0835	0	1.1198	1.4319	0	1.2872	1.1746
195	pos_556	Simple ID		2	pos	556	1.947	332.134	[M+H]+	generic	C14H21NO8	Zinolol	6.7906	6.7906	Unknown	3	56	332.134	[M+H]+	331.127	9.31e-05	3.879	Phenolic glycosides	XDRANPRXTFIDRB-PPTNFGOFNA-N	OC=2C=C(OC1OC(CO)C(O)C(O)C1(O))C(O)=C(C=2)CNC						KNApSAcK=C00032550,ChEBI=CHEBI:66506,NANPDB=NANPDB_3410;NANPDB_3411,UNPD=UNPD105633	0.0972	0.1234	0.0844	0.0872	0.0753	0.1189	0.1116	0.0982	0.1266	0.1163	2.5345	2.623	3.1669	2.8345	4.266	2.0608	3.8992	3.4233
196	pos_562	Simple ID		1	pos	562	8.49	333.155	[M+H]+	generic	C16H20N4O4	Tryptophyl-Gamma-glutamate	6.379	6.379	Unknown	3	48	333.156	[M+H]+	332.148	0.0002316	3.632	Glutamine and derivatives	FNGTUNXVLUYBPN-UHFFFAOYNA-N	O=C(O)C(N)CCC(=O)NC(=O)C(N)CC2=CNC=1C=CC=CC=12						HMDB=HMDB0029097	0.0062	0.0147	0.0106	0	0.0093	0.007	0.0143	0.0246	0	0.0044	0.6234	0.3357	0.4234	0.4306	0.3615	0.5357	0.5746	0.3583
197	pos_202	Simple ID		3	pos	202	12.922	163.039	[M+H-H2O]+	genus	C9H8O4	4-[(1E)-2-carboxyeth-1-en-1-yl]-2-hydroxybenzenolate	5.6786	11.3572	Unknown	3	73	163.039	[M+H-H2O]+	180.042	7.05e-05	3.515		QAIPRVGONGVQAS-DUXPYHPUSA-M	O=C(O)C=CC=1C=CC([O-])=C(O)C=1	Anacardium occidentale|Ananas comosus|Aquilegia coerulea|Arabidopsis halleri|Asparagus officinalis|Beta vulgaris|Boechera stricta|Brassica napus|Calotropis gigantea|Catharanthus roseus|Chenopodium quinoa|Citrus|Corchorus capsularis|Daucus carota|Dioscorea|Eutrema salsugineum|Homo sapiens|Hordeum vulgare|Kalanchoe fedtschenkoi|Kalanchoe laxiflora|Malus|Mimulus|Musa acuminata|Oropetium thomaeum|Ory…	Cinnamic acids and derivatives	Hydroxycinnamic acids and derivatives	1a	44661	chebi:57770|hmdb:HMDB03501|plantcyc:CPD-676|beilstein registry number:8986917|chemspider:4450294|gmelin registry number:1824843|kegg ligand:C01197|metabolights:MTBLC57770|pubchem cid:54691412	0.0119	0.0091	0.009	0.0088	0.0194	0.0196	0.0197	0.0572	0.0349	0.019	0	0.01	0.0118	0.0467	0	0.005	0.0588	1.7569
198	pos_566	Simple ID	Other possible annotated peaks for this cluster.	2	pos	566	13.292	339.216	[M+H]+	generic	C19H30O5	[6]-Gingerdiol 3-acetate	6.953	6.953	Unknown	3	131	339.216	[M+H]+	338.209	0.0002005	3.85	Fatty alcohol esters	OEGIGAPIFHYJOL-UHFFFAOYNA-N	O=C(OC(CCC=1C=CC(O)=C(OC)C=1)CC(O)CCCCC)C						HMDB=HMDB0040566,FooDB=FDB007733;FDB020344,UNPD=UNPD37943	0.92	0.0373	1.6043	0.0195	0.066	0.0369	0.0323	0.0633	0.1378	0.791	0.0153	0.0048	0.0345	0.0351	0.036	0	0.0174	0.0087
199	pos_537	Simple ID	Other possible annotated peaks for this cluster.	3	pos	537	7.473	324.093	[M+H-H2O]+	genus	C12H23NO6S2	(2S,3R,4S,5S,6R)-2-{[(1E)-1-(hydroxyimino)-5-(methylsulfanyl)pentyl]sulfanyl}-6-(hydroxymethyl)oxane-3,4,5-triol	6.9918	13.9836	Unknown	3	55	324.093	[M+H-H2O]+	341.097	0.0001912	3.848		WILLOUKDISBKTQ-KALKGZTMSA-N	ON=C(CCCCSC)SC1OC(CO)C(O)C(O)C1(O)	Arabidopsis halleri|Brassica napus|Brassica rapa|Capsella rubella|Eutrema salsugineum	Organooxygen compounds	Carbohydrates and carbohydrate conjugates	1a	234347	chebi:80986|plantcyc:CPDQT-416|foodb:FDB030515|pubchem cid:46173874	0.132	0.3495	0.2618	0.0925	0.1034	0.2357	0.2339	0.5778	0.0109	0.0182	0.0574	0.0372	0.0516	0.0469	0.0399	0.0767	0.0441	0.0607
200	pos_570	Unknown compound		1	pos	570	14.868	343.296	[M+H]+	Unknown																						0.7559	0.703	0.8027	0.6615	0.7169	0.5194	0.6905	0.8157	0.9618	0.9132	0.7982	0.6572	0.6817	0.8468	0.6315	0.566	0.6115	0.5723
201	pos_148	Simple ID	Other possible annotated peaks for this cluster.	5	pos	148	1.9	150.058	[M+H]+	Standard	C5H11NO2S	L-methionine	5.4001	10.8002	(IROA) METHIONINE	3	124	150.058	[M+H]+	149.051	2.6e-05	2.897		FFEARJCKVFRZRR-SGAVLPGINA-N	O=C(O)C(N)CCSC	Arabidopsis thaliana|Codonopsis pilosula|Codonopsis subglobosa|Escherichia coli|Ginkgo biloba|Pinellia ternata|Punica granatum			1a	169388	knapsack:C00001379|cas:63-68-3	1.0104	0.8268	1.1243	0.9339	0.4753	0.7578	0.8687	0.7327	0.4115	0.3084	0.8974	1.0885	0.7647	1.1423	1.1866	1.2652	0.8509	0.7582
202	pos_548	Simple ID	Other possible annotated peaks for this cluster.	3	pos	548	8.324	327.201	[M+H]+	generic	C14H30O8	Heptaethylene glycol	6.565	6.565	Unknown	3	36	327.201	[M+H]+	326.194	4.44e-05	3.712	Polyethylene glycols	XPJRQAIZZQMSCM-UHFFFAOYSA-N	OCCOCCOCCOCCOCCOCCOCCO						HMDB=HMDB0061835,ChEBI=CHEBI:44748,Saliva=HMDB0061835,Feces=HMDB0061835,BLEXP=BLEXPDB00000079718	0.4438	0.4018	0.426	0.4328	1.059	0.3609	0.3756	0.373	0.5784	0.4839	0.3681	0.3286	0.3478	0.3234	0.3468	0.4037	0.3078	0.3215
203	neg_294	Double ID		2	neg	294	8.344	399.093	[M+FA-H]-	genus	C16H18O9	scopolin	4.1999	8.3998	Unknown	3	3	399.093	[M+FA-H]-	354.095	0.0001847	2.887		SGTCGCCQZOUMJJ-JXQFOPSLNA-N	O=C2OC3=CC(OC1OC(CO)C(O)C(O)C1(O))=C(OC)C=C3(C=C2)	Aesculus pavia|Anthemis|Arabidopsis thaliana|Artemisia annua|Artemisia minor|Astragalus brachycarpus|Astragalus falcatus|Baptisia arachnifera|Baptisia bracteata|Baptisia calycosa|Baptisia cinerea|Baptisia lanceolata|Baptisia nuttalliana|Baptisia perfoliata|Baptisia simplicifolia|Baptisia tinctoria|Celtis|Erycibe obtusifolia|Erycibe schmidtii|Hedera|Helianthus annuus|Macaranga tanarius|Mandragora|…	Coumarins and derivatives	Coumarin glycosides	1a	139373	chebi:16065|knapsack:C00002500|plantcyc:SCOPOLIN|unpd:UNPD168631|cas:531-44-2|foodb:FDB012168|pubchem cid:346340	0.1002	0.1359	0.0077	0.0222	0.0258	0.0599	0	0.0094	0.0095	0.0086	0.5746	0.5625	0.6659	0.8131	0.7892	0.8297	0.5794	1.2282
204	pos_725	Double ID		7	pos	725	9.452	595.166	[M+H]+	genus	C27H30O15	3,3',4',7-Tetrahydroxyflavone; 7-O-[?-L-Rhamnopyranosyl-(1?6)-?-D-glucopyranoside]	6.9215	13.843	Unknown	3	76	595.166	[M+H]+	594.158	-5.33e-05	3.724		ROKINGZIRKUMQG-UHFFFAOYSA-N	O=C3C(O)=C(OC=4C=C(OC2OC(COC1OC(C)C(O)C(O)C1(O))C(O)C(O)C2(O))C=CC3=4)C=5C=CC(O)=C(O)C=5	Baptisia	Flavonoids	Flavonoid glycosides	1b	970415	dnp:KSH43	2.4999	2.5079	3.4698	3.2045	3.1445	3.6664	2.063	3.9035	2.9476	3.5644	9.9031	10.344	10.3883	11.2009	11.2438	11.6686	9.3884	11.0685
205	pos_582	Simple ID	Other possible annotated peaks for this cluster.	2	pos	582	16.711	353.269	[M+H]+	genus	C21H36O4	Pregnane-2,3,16,20-tetrol|Pregnane-2,3,16,20-tetrol; (2?,3?,5?,16?,20?)-form|Pregnane-2,3,16,20-tetrol; (2?,3?,5?,16?,20R)-form	6.1668	12.3336	Unknown	3	91	353.269	[M+H]+	352.261	3.61e-05	3.606		GDKXZPQRUWPQMV-UHFFFAOYNA-N	OC(C)C3C(O)CC2C4CCC1CC(O)C(O)CC1(C)C4(CCC23(C))		Steroids and steroid derivatives	Pregnane steroids	1b	970053	dnp:BRV64	0.4275	0.2127	0.4359	0.0463	0.3329	0.2553	0.1143	0.1577	0.5678	0.4949	0	0	0	0	0	0	0	0
206	pos_583	Simple ID	Other possible annotated peaks for this cluster.	2	pos	583	17.012	353.269	[M+H]+	genus	C21H36O4	Pregnane-2,3,16,20-tetrol|Pregnane-2,3,16,20-tetrol; (2?,3?,5?,16?,20?)-form|Pregnane-2,3,16,20-tetrol; (2?,3?,5?,16?,20R)-form	6.3342	12.6684	Unknown	3	114	353.269	[M+H]+	352.261	-6.39e-05	3.726		GDKXZPQRUWPQMV-UHFFFAOYNA-N	OC(C)C3C(O)CC2C4CCC1CC(O)C(O)CC1(C)C4(CCC23(C))		Steroids and steroid derivatives	Pregnane steroids	1b	970053	dnp:BRV64	0.3579	0.3507	0.5255	0.0923	0.2757	0.1339	0.299	0.1745	0.3609	0.5463	0	0	0	0	0	0	0	0
207	pos_599	Simple ID		1	pos	599	5.308	362.086	[M+H]+	genus	C11H16N5O7P	2-Methyladenosine; 5'-Phosphate	5.7235	11.447	Unknown	3	24	362.086	[M+H]+	361.079	-8.91e-05	3.414		DEYSCYWEHGTTSA-UHFFFAOYSA-N	O=P(O)(O)OCC3OC(N2C=NC1=C(N=C(N=C12)C)N)C(O)C3(O)		Purine nucleotides	Purine ribonucleotides	1b	998722	dnp:HDP43	0.1082	0.0771	0.1025	0.0836	0.0827	0.0992	0.1083	0.1007	0.035	0.0864	0.4443	0.4452	0.4051	0.4852	0.3862	0.4392	0.3541	0.3492
208	pos_14	Simple ID	Other possible annotated peaks for this cluster.	8	pos	14	10.307	109.101	[M+H]+	generic	C8H12	Fucoserratene;(3E,5Z)-1,3,5-Octatriene	6.2057	6.2057	Unknown	3	48	109.101	[M+H]+	108.094	7.68e-05	3.244	Alkatrienes	HOXGZVUCAYFWGR-YMBWGVAGSA-N	C=CC=CC=CCC						KNApSAcK=C00000241,ChEBI=CHEBI:77504,FooDB=FDB029633,UNPD=UNPD110894;UNPD190684;UNPD4803;UNPD48856	2.6177	3.6792	2.4939	2.9309	1.0698	2.9244	3.3685	2.2027	4.5087	1.7367	2.6194	2.9517	3.2703	2.4624	2.4542	3.6005	3.6842	3.4595
209	pos_604	Simple ID		1	pos	604	13.812	365.154	[M+H]+	generic	C18H24N2O4S	Fusaperazine B	5.7906	5.7906	Unknown	3	104	365.154	[M+H]+	364.146	-0.0007453	3.419	Alpha amino acids and derivatives	ZEWCHEYJHBQAHF-PWQNQZOANA-N	O=C1NC(OC)(C(=O)NC1SC)CC2=CC=C(OCC=C(C)C)C=C2						KNApSAcK=C00015077,UNPD=UNPD147004	0.7662	0.1498	0.6569	0.0764	0.0722	0.101	0.0496	0.0424	0.1965	0.5496	0	0	0	0	0	0	0	0
210	pos_605	Simple ID		1	pos	605	13.533	365.154	[M+H]+	generic	C18H24N2O4S	Fusaperazine B	5.6683	5.6683	Unknown	3	71	365.154	[M+H]+	364.146	-0.0008453	3.326	Alpha amino acids and derivatives	ZEWCHEYJHBQAHF-PWQNQZOANA-N	O=C1NC(OC)(C(=O)NC1SC)CC2=CC=C(OCC=C(C)C)C=C2						KNApSAcK=C00015077,UNPD=UNPD147004	0.7358	0.1163	0.5811	0.0403	0.1745	0.1695	0.0306	0.0682	0.443	0.5857	0	0	0	0	0	0	0	0
211	pos_728	Double ID		4	pos	728	9.054	611.16	[M+H]+	Standard	C27H30O16	2-(3,4-dihydroxyphenyl)-5-hydroxy-7-{[3,4,5-trihydroxy-6-(hydroxymethyl)oxan-2-yl]oxy}-3-[(3,4,5-trihydroxy-6-methyloxan-2-yl)oxy]-4H-chromen-4-one	8.0802	8.0802	(Metasci) Rutin hydrate	3	82	611.16	[M+H]+	610.153	0.0004613	3.8	Flavonoid-7-O-glycosides	MCTZMXCUYPDYNE-UHFFFAOYNA-N	O=C3C(OC1OC(C)C(O)C(O)C1(O))=C(OC4=CC(OC2OC(CO)C(O)C(O)C2(O))=CC(O)=C34)C=5C=CC(O)=C(O)C=5						HMDB=HMDB0135150,KNApSAcK=C00005431,ChEBI=CHEBI:133244,FooDB=FDB016380,LipidMAPS=LMPK12112199,PubChem=25245356;6325870,PlantCyc=CPD-8011,UNPD=UNPD14859;UNPD57433;UNPD66057	0.0457	0.0511	0.0881	0.099	0.0881	0.1	0.0548	0.0812	0.0455	0.0912	4.3925	3.7229	3.2608	4.3962	4.0944	3.9081	2.8271	3.3768
212	pos_610	Simple ID		2	pos	610	11.54	369.118	[M+H]+	genus	C17H20O9	6-(3,4-Dihydroxyphenyl)-5,6-dihydro-2H-pyran-2-one; 4'-O-?-D-Glucopyranoside	6.3259	12.6518	Unknown	3	55	369.118	[M+H]+	368.111	8.7e-06	3.588		ANUPXNGYFANTHY-UHFFFAOYSA-N	O=C3OC(C=2C=CC(OC1OC(CO)C(O)C(O)C1(O))=C(O)C=2)CC=C3	Psilotum nudum	Organooxygen compounds	Carbohydrates and carbohydrate conjugates	1b	1011298	dnp:KZW93	0.7705	0.8201	0.53	0.3255	1.3072	1.296	0.8171	1.2428	0.5859	0.9949	0.3699	0.4279	0.2435	0.1825	0.3774	0.4133	0.3775	0.0056
213	neg_388	Simple ID		7	neg	388	9.987	577.156	[M-H]-	genus	C27H30O14	5-hydroxy-2-(4-hydroxyphenyl)-3-{[(2S,3S,4R,5R,6S)-3,4,5-trihydroxy-6-methyloxan-2-yl]oxy}-7-{[(2S,3S,4S,5R,6S)-3,4,5-trihydroxy-6-methyloxan-2-yl]oxy}chromen-4-one	6.726	13.452	Unknown	3	12	577.156	[M-H]-	578.164	0.0004792	3.984		PUPKKEQDLNREIM-SIHGUETHNA-N	O=C3C(OC1OC(C)C(O)C(O)C1(O))=C(OC4=CC(OC2OC(C)C(O)C(O)C2(O))=CC(O)=C34)C5=CC=C(O)C=C5	Arabidopsis thaliana|Ardisia|Asplenium bulbiferum|Asplenium trichomanes|Bupleurum chinense|Celastrus hypoleucus|Chenopodium|Cinnamomum|Clibadium pilonicum|Clibadium surinamense|Desmodium|Dorycnium graecum|Dorycnium pentaphyllum|Dryopteris crassirhizoma|Epimedium acuminatum|Epimedium sutchuenense|Eryngium planum|Erythroxylum cuneifolium|Eupatorium|Ficus septica|Garcinia dulcis|Geranium nepalense|H…	Flavonoids	Flavonoid glycosides	1a	134699	knapsack:C00005189|cas:482-38-2	14.7583	13.5325	21.4901	18.6191	20.9211	25.1784	12.7671	21.7253	16.2686	23.0493	17.1599	17.7045	18.5303	18.5129	19.8554	21.1206	21.693	17.9634
214	pos_200	Simple ID		11	pos	200	1.397	162.076	[M+H]+	Standard	C6H11NO4	Acetylhomoserine	7.9658	7.9658	(IROA) AMINOADIPATE	3	51	162.076	[M+H]+	161.069	8.43e-05	3.873	L-alpha-amino acids	FCXZBWSIAGGPCB-UHFFFAOYNA-N	O=C(O)C(N)CCOC(=O)C						HMDB=HMDB0029423,KNApSAcK=C00019570,ChEBI=CHEBI:16288;CHEBI:7671;CHEBI:37034;CHEBI:57716;CHEBI:132989,YMDB=YMDB00158,FooDB=FDB000523;FDB002270,PubChem=25244888;439389,PlantCyc=CPD-667,UNPD=UNPD136786,BLEXP=BLEXPDB00000439389	4.2994	5.0307	3.8347	5.3214	4.3578	4.9196	5.6949	4.6453	2.9175	3.2223	3.436	3.1949	3.2079	3.2157	3.0928	3.5154	3.2505	3.3358
215	pos_617	Unknown compound		2	pos	617	7.267	375.224	[M+H]+	Unknown																						0.5712	0.0373	0.6912	0.0185	0.0577	0.0783	0.0276	0.0442	0.1828	0.2749	0.0245	0.0238	0.0254	0.0216	0.0239	0.0202	0.0299	0.0236
216	pos_619	Unknown compound		1	pos	619	16.924	376.259	[M+H]+	Unknown																						0.8967	0.9104	1.1204	0.9852	1.1086	0.7801	0.8314	0.8988	1.2014	0.9593	1.0893	0.9303	0.9611	0.8974	1.1129	1.1252	0.7941	0.8659
217	pos_625	Double ID		2	pos	625	16.954	387.193	[M+H]+	generic	C21H26N2O5	Isomitraphyllinol	5.7619	5.7619	Unknown	3	44	387.193	[M+H]+	386.184	-0.0015516	3.474	Yohimbine alkaloids	BZEARLNMWSCOOH-FINZIQEYNA-N	O=C(OC)C4C(O)OC(C)C5CN3CCC2(C(=O)NC=1C=CC=CC=12)C3CC45						KNApSAcK=C00030537;C00034996,UNPD=UNPD161922;UNPD196657	0.3676	0.2603	0.3485	0.3557	0.7021	0.2555	0.2885	0.2865	0.3985	0.3381	0.3577	0.2881	0.2756	0.2516	0.6561	0.3232	0.2659	0.2939
218	pos_627	Unknown compound		1	pos	627	8.669	388.254	[M+H]+	Unknown																						0.6937	0.5606	0.5669	0.5799	0.9679	0.4809	0.5447	0.5087	0.716	0.675	0.504	0.5082	0.4697	0.4297	0.4726	0.4821	0.4344	0.4972
219	pos_189	Simple ID	Other possible annotated peaks for this cluster.	3	pos	189	8.812	160.076	[M+H]+	genus	C10H9NO	1H-Indole-3-carboxaldehyde; N-Me	5.1716	10.3432	Unknown	3	120	160.076	[M+H]+	159.068	0.0001904	3.51		KXYBYRKRRGSZCX-UHFFFAOYSA-N	O=CC1=CN(C2=CC=CC=C12)C	Phellinus	Indoles and derivatives	N-alkylindoles	1b	233426	dnp:BNC61|unpd:UNPD135251|cas:19012-03-4	2.6551	2.9386	2.0274	2.3806	2.3507	2.5769	2.2227	2.3379	2.1728	1.8589	2.122	1.9126	1.9551	1.9188	2.1299	2.0798	2.0312	1.9194
220	pos_137	Simple ID	Other possible annotated peaks for this cluster.	15	pos	137	1.196	148.06	[M+H]+	Standard	C5H9NO4	L-glutamic acid	7.1073	14.2146	(IROA) N-METHYLASPARTATE	3	19	148.06	[M+H]+	147.053	3.42e-05	3.961		WHUUTDBJXJRKMK-YEQUQEJONA-N	O=C(O)CCC(N)C(=O)O	Arabidopsis thaliana|Curcuma|Escherichia coli|Pisum sativum|Trifolium pratense|Trifolium repens	Carboxylic acids and derivatives	Amino acids, peptides, and analogues	1a	169767	knapsack:C00001358|cas:56-86-0	64.4946	65.7411	76.2091	93.0037	55.0769	49.5812	73.8809	55.3197	74.1819	67.2789	34.3176	44.0785	43.8568	44.3095	36.5979	42.1236	38.7329	41.6353
221	pos_718	Unknown compound		5	pos	718	8.092	548.037	[M-C6H10O4]+	Unknown																						0.394	0.4141	0.2927	0.1721	0.4098	0.3932	0.3679	0.5177	0.1771	0.2295	0.4465	0.3754	0.3749	0.4095	0.4301	0.3264	0.3199	0.3658
222	pos_654	Unknown compound		1	pos	654	9.106	420.763	[M+H]+	Unknown																						0.6051	0.3087	0.4139	0.344	0.364	0.3048	0.3569	0.2139	0.5271	0.3306	0.0445	0.0479	0.0935	0.0505	0.0605	0.047	0.0713	0.038
223	neg_419	Simple ID		6	neg	419	8.687	739.21	[M-H]-	genus	C33H40O19	3-{[(2S,3R,4S,5S,6R)-4,5-dihydroxy-6-(hydroxymethyl)-3-{[(2S,3R,4R,5R,6S)-3,4,5-trihydroxy-6-methyloxan-2-yl]oxy}oxan-2-yl]oxy}-5-hydroxy-2-(4-hydroxyphenyl)-7-{[(2S,3R,4R,5R,6S)-3,4,5-trihydroxy-6-methyloxan-2-yl]oxy}chromen-4-one	6.0796	12.1592	Unknown	3	8	739.21	[M-H]-	740.216	-0.0007974	3.862		DDELFAUOHDSZJL-CPGGTDLHSA-N	O=C4C(OC2OC(CO)C(O)C(O)C2(OC1OC(C)C(O)C(O)C1(O)))=C(OC5=CC(OC3OC(C)C(O)C(O)C3(O))=CC(O)=C45)C6=CC=C(O)C=C6	Arabidopsis thaliana|Lotus edulis|Vicia faba	Flavonoids	Flavonoid glycosides	1a	3999	chebi:68879|unpd:UNPD62308|pmid:22014228|reaxys registry number:7164389	5.7264	4.9052	7.5094	5.9834	7.6492	7.6584	3.8463	6.4691	5.848	8.0596	6.0211	5.1777	6.0672	6.0017	5.4052	6.1186	5.0631	5.8533
224	pos_663	Unknown compound		1	pos	663	8.976	432.28	[M+H]+	Unknown																						0.5954	0.5187	0.5782	0.6611	0.6907	0.5218	0.4796	0.4885	0.7021	0.6251	0.5247	0.4903	0.4821	0.4699	0.5483	0.5116	0.4157	0.4461
225	neg_22	Simple ID	Other possible annotated peaks for this cluster.	16	neg	22	1.227	146.046	[M-H]-	Standard	C5H9NO4	L-glutamic acid	8.0744	16.1488	(IROA) GLUTAMATE	3	3	146.046	[M-H]-	147.053	8.13e-05	4.86		WHUUTDBJXJRKMK-YEQUQEJONA-N	O=C(O)CCC(N)C(=O)O	Arabidopsis thaliana|Curcuma|Escherichia coli|Pisum sativum|Trifolium pratense|Trifolium repens	Carboxylic acids and derivatives	Amino acids, peptides, and analogues	1a	169767	knapsack:C00001358|cas:56-86-0	40.4423	41.8442	49.8795	57.3646	54.751	44.4208	45.1924	36.7698	63.2647	54.4681	23.3618	26.5316	28.8449	25.94	24.3993	26.2147	25.6991	24.4047
226	pos_670	Simple ID		2	pos	670	2.595	438.056	[M+H]+	genus	C12H23NO10S3	(2R,3S,4S,5R,6S)-2-(hydroxymethyl)-6-{[(1Z)-5-[(S)-methanesulfinyl]-1-[(sulfonatooxy)imino]pentyl]sulfanyl}oxane-3,4,5-triol	3.9711	7.9422	Unknown	3	6	438.056	[M+H]+	437.048	8.54e-05	2.196		GMMLNKINDDUDCF-BYNGITTOSA-M	O=S(C)CCCCC(=NOS(=O)(=O)[O-])SC1OC(CO)C(O)C(O)C1(O)	Arabidopsis thaliana|Brassica oleracea	Organooxygen compounds	Carbohydrates and carbohydrate conjugates	1a	9660	chebi:5415|beilstein registry number:6754088|reaxys registry number:6754088	0.4549	0.5116	0.3263	0.3489	0.6715	0.6209	0.4881	0.7362	0.3224	0.2836	0.053	0.0317	0.0407	0.0354	0.0551	0.0443	0.0459	0.0432
227	pos_675	Unknown compound		1	pos	675	16.612	449.149	[M+H]+	Unknown																						0.4057	0.4154	0.4542	0.4597	0.6611	0.3153	0.4273	0.4071	0.5915	0.4057	0.4427	0.3453	0.3636	0.3234	0.7211	0.3708	0.3578	0.3338
228	pos_637	Simple ID	Other possible annotated peaks for this cluster.	6	pos	637	11.81	398.167	[M+H]+	genus	C16H23N5O7	Zeatin; 2-Hydroxy, 9-?-D-glucopyranosyl	5.0445	10.089	Unknown	3	25	398.167	[M+H]+	397.16	0.0003245	3.151		YDOONEZNZACYLV-FARCUNLSSA-N	OC1=NC(NCC=C(C)CO)=C2N=CN(C2(=N1))C3OC(CO)C(O)C(O)C3(O)	Gleditsia caspia	Organooxygen compounds	Carbohydrates and carbohydrate conjugates	1b	927445	dnp:QJG31	0.3609	0.6416	0.3279	0.3745	0.3272	0.6618	0.4392	0.6671	0.2752	0.152	3.2217	2.9586	2.6293	3.0836	2.9861	2.9448	2.4023	3.1105
229	pos_650	Simple ID	Other possible annotated peaks for this cluster.	4	pos	650	17.256	415.211	[M+H]+	generic	C24H30O6	4-O-Methylmelleolide	7.7773	7.7773	Unknown	3	33	415.212	[M+H]+	414.204	1.51e-05	4.249	Melleolides and analogues	GYCBSZGIYPNYAB-UHFFFAOYNA-N	O=CC3=CC1CC(C)(C)CC1C4(C)(CC(OC(=O)C2=C(O)C=C(O)C=C2C)C34(OC))						HMDB=HMDB0037039,KNApSAcK=C00021453,FooDB=FDB016021,UNPD=UNPD133812	2.3113	1.9394	1.7585	1.718	1.5322	1.6931	1.4647	1.371	1.7234	1.4179	1.8285	1.8797	1.6797	1.8738	2.2365	1.9421	1.6694	1.8463
230	pos_27	Simple ID	Other possible annotated peaks for this cluster.	7	pos	27	1.305	116.071	[M+H]+	Standard	C5H9NO2	Proline|Proline; (R)-form|Proline; (S)-form|Proline; (?)-form	7.5066	15.0132	(IROA) PROLINE	3	17	116.07	[M+H]+	115.063	0.000105	4.753		ONIBWKKTOPOVIA-UHFFFAOYSA-N	O=C(O)C1NCCC1	Arabidopsis thaliana|Astragalus mongholicus|Brassica napus|Caenorhabditis elegans|Calanus helgolandicus|Crocus sativus|Daphnia|Homo sapiens|Mus|Oryza sativa|Panax ginseng|Pseudomonas putida|Rattus norvegicus|Ruegeria pomeroyi|Sea|Synechococcus elongatus|Vitis vinifera	Carboxylic acids and derivatives	Amino acids, peptides, and analogues	1a	21212	dnp:BDS30|chebi:26271|beilstein registry number:80809|cas:609-36-9|gmelin registry number:26927|kegg compounds:C16435|pmid:16534801|reaxys registry number:80809|wikipedia:Proline	14.8913	16.8494	17.14	19.4051	14.5251	12.4076	15.152	16.7626	11.7036	17.6455	11.9711	11.3731	11.0627	12.426	10.616	12.6833	11.68	11.4592
231	pos_691	Simple ID		1	pos	691	9.246	476.307	[M+H]+	generic	C21H41N5O7	Netilmicin	5.9799	5.9799	Unknown	3	32	476.307	[M+H]+	475.301	0.0013751	3.414	Aminocyclitol glycosides	ZBGPYVZLYBDXKO-HILBYHGXSA-N	OC3COC(OC2C(O)C(OC1OC(=CCC1(N))CN)C(N)CC2(NCC))C(O)(C)C3(NC)						HMDB=HMDB0015090,ChEBI=CHEBI:7528,DrugBank=DB00955,SMPDB=PW_C009396,Urine=HMDB0015090,Serum=HMDB0015090,BLEXP=BLEXPDB00006857423	0.4481	0.4368	0.5202	0.5124	0.6288	0.3699	0.417	0.3769	0.6008	0.5604	0.3774	0.3951	0.4074	0.3678	0.3842	0.4578	0.3631	0.3557
232	pos_693	Unknown compound		1	pos	693	7.448	485.119	[M+H]+	Unknown																						1.4471	0.5603	2.2925	0.342	0.4301	0.6607	0.6805	1.2978	0.5011	0.7483	0.4672	0.6	0.5323	0.7352	0.4696	0.6303	0.5666	0.6495
233	pos_699	Simple ID	Other possible annotated peaks for this cluster.	2	pos	699	13.02	501.269	[M+H]+	family	C25H40O10	7(14)-Bisabolene-1,2,3,4,5,8,10,11-octol; 5,8-Diangeloyl	4.0974	6.1461	Unknown	3	21	501.269	[M+H]+	500.262	0.0002239	2.758		AEXFJGGOFXBBPA-QKFASICWNA-N	O=C(OC(C(=C)C1C(O)C(O)C(O)(C)C(O)C1(OC(=O)C(=CC)C))CC(O)C(O)(C)C)C(=CC)C	Parasenecio rubescens			1b	988902	dnp:RVJ85	1.074	0.0522	0.9178	0.0086	0.0321	0.0639	0	0.0147	0.1266	0.41	0	0	0	0	0.0113	0	0	0
234	pos_700	Unknown compound		1	pos	700	10.726	502.054	[M+H]+	Unknown																						0.0631	0.1559	0.0744	0.0928	0.0875	0.1623	0.0848	0.1777	0.0409	0.0309	0.4643	0.4672	0.4065	0.3691	0.4971	0.4862	0.3997	0.4132
235	pos_701	Unknown compound		1	pos	701	11.394	508.154	[M+H]+	Unknown																						0.4248	0.1563	0.1754	0.1127	0.4884	0.2607	0.1193	0.0818	0.3763	0.4937	0.1274	0.1138	0.1371	0.1844	0.1214	0.1333	0.0975	0.1302
236	pos_318	Simple ID		2	pos	318	7.279	205.097	[M+H]+	Standard	C11H12N2O2	Tryptophan|Tryptophan; (R)-form|Tryptophan; (S)-form|Tryptophan; (?)-form	6.9745	13.949	(IROA) TRYPTOPHAN	3	53	205.097	[M+H]+	204.09	0.0001541	4.091		QIVBCDIJIAJPQS-UHFFFAOYSA-N	O=C(O)C(N)CC2=CNC1=CC=CC=C12	Arabidopsis thaliana|Brassica napus|Caenorhabditis elegans|Calanus helgolandicus|Cichorium intybus|Cucumaria georgiana|Daphnia|Homo sapiens|Lactuca sativa|Mus|Nicotiana attenuata|Oryza sativa|Panax ginseng|Populus deltoides|Pseudomonas putida|Ruegeria pomeroyi|Saccharomyces cerevisiae|Schizosaccharomyces pombe|Sea|Synechococcus elongatus	Indoles and derivatives	Indolyl carboxylic acids and derivatives	1a	46343	dnp:CHP14|chebi:27897|hmdb:HMDB0030396|knapsack:C00001396|beilstein registry number:86196|cas:54-12-6|chemspider:1116|foodb:FDB002251|gmelin registry number:4532|kegg compounds:C00806|lincs:LSM-36836|pmid:13864966|pubchem cid:1148|reaxys registry number:86196|wikipedia:Tryptophan	0.8519	0.8085	0.7556	1.0757	0.6919	1.1421	0.6221	0.6086	0.7798	0.8637	2.9246	3.3769	2.835	2.5318	4.0972	2.4107	2.582	2.8025
237	pos_709	Simple ID		1	pos	709	16.982	518.324	[M+H]+	generic	C26H48NO7P	LysoPC(18:3(6Z,9Z,12Z))	7.1419	7.1419	Unknown	3	32	518.324	[M+H]+	517.317	1.6e-05	3.835	1-acyl-sn-glycero-3-phosphocholines	MRTUWVDDQVMUCR-ACHCNROVSA-N	O=C(OCC(O)COP(=O)([O-])OCC[N+](C)(C)C)CCCCC=CCC=CCC=CCCCCC						HMDB=HMDB0010387,ChEBI=CHEBI:88698,FooDB=FDB027538,BMDB=BMDB10387,LipidMAPS=LMGP01050128,Serum=HMDB0010387,BLEXP=BLEXPDB00052924045	0.4199	0.2142	0.1276	0.0714	0.208	0.1916	0.1737	0.0858	0.3139	0.166	0.0898	0.1097	0.1425	0.1603	0.152	0.1156	0.1467	0.1269
238	pos_71	Simple ID	Other possible annotated peaks for this cluster.	4	pos	71	2.386	130.05	[M+H]+	Standard	C5H7NO3	3,4-Dihydro-4-hydroxy-2H-pyrrole-2-carboxylic acid	5.9057	11.8114	(IROA) OXOPROLINE	3	29	130.05	[M+H]+	129.043	6.95e-05	3.687		WFOFKRKDDKGRIK-UHFFFAOYSA-N	O=C(O)C1N=CC(O)C1	Arabidopsis thaliana|Homo sapiens	Carboxylic acids and derivatives	Amino acids, peptides, and analogues	1a	40480	dnp:BCS38|chebi:27391|hmdb:HMDB0001369|beilstein registry number:121071|bigg:43511|cas:22573-88-2|chemspider:1030|foodb:FDB022582|kegg compounds:C04281|metacyc:PYRROLINE-HYDROXY-CARBOXYLATE|metlin:6196|pmid:10379660|pubchem cid:1059	1.4677	1.2879	1.467	0.9828	1.2124	0.9598	1.3905	1.8223	0.966	1.141	17.6256	16.6388	17.4163	16.458	23.8662	15.3959	21.2522	19.6373
239	pos_710	Double ID		3	pos	710	17.24	518.324	[M+H]+	generic	C26H48NO7P	LysoPC(18:3(6Z,9Z,12Z))	6.727	6.727	Unknown	3	49	518.324	[M+H]+	517.317	-0.000184	3.488	1-acyl-sn-glycero-3-phosphocholines	MRTUWVDDQVMUCR-ACHCNROVSA-N	O=C(OCC(O)COP(=O)([O-])OCC[N+](C)(C)C)CCCCC=CCC=CCC=CCCCCC						HMDB=HMDB0010387,ChEBI=CHEBI:88698,FooDB=FDB027538,BMDB=BMDB10387,LipidMAPS=LMGP01050128,Serum=HMDB0010387,BLEXP=BLEXPDB00052924045	0.5915	0.9632	0.3399	0.5	0.6221	0.42	1.1907	0.2997	0.341	0.3027	0.1316	0.1612	0.1792	0.2103	0.1922	0.1561	0.1742	0.1602
240	pos_711	Simple ID		1	pos	711	17.841	520.339	[M+H]+	generic	C26H50NO7P	LysoPC(18:2(9Z,12Z))	7.3422	7.3422	Unknown	3	38	520.339	[M+H]+	519.332	0.000466	3.81	1-acyl-sn-glycero-3-phosphocholines	SPJFYYJXNPEZDW-FTJOPAKQSA-N	O=C(OCC(O)COP(=O)([O-])OCC[N+](C)(C)C)CCCCCCCC=CCC=CCCCCC						HMDB=HMDB0010386,ChEBI=CHEBI:28733,YMDB=YMDB02212,FooDB=FDB027537;FDB030316,BMDB=BMDB10386,LipidMAPS=LMGP01050035,Urine=HMDB0010386,Feces=HMDB0010386,Serum=HMDB0010386,PlantCyc=CPD-8347,UNPD=UNPD43989,BLEXP=BLEXPDB00011005824;BLEXPDB00005280646;BLEXPDB00005313990	0.4161	0.2117	0.1869	0.1154	0.214	0.2062	0.2117	0.1291	0.2686	0.1723	0.1038	0.1079	0.1359	0.1381	0.1179	0.0894	0.1166	0.1193
241	pos_636	Unknown compound		14	pos	636	1.37	396.035	[M+Na]+	Unknown																						1.3378	1.4966	1.1064	1.3753	1.3647	1.0763	1.5472	1.0407	1.8198	1.1606	0.8434	0.6624	0.6689	0.5963	0.6626	0.6656	0.7355	0.5274
242	pos_721	Double ID		2	pos	721	11.12	575.176	[M+H-H2O]+	genus	C28H32O14	1,2-di-O-sinapoyl-?-D-glucose	6.2537	12.5074	Unknown	3	54	575.176	[M+H-H2O]+	592.179	0.0002175	3.829		KQDOTXAUJBODDM-STUNQXDBSA-N	O=C(OC2OC(CO)C(O)C(O)C2(OC(=O)C=CC1=CC(OC)=C(O)C(OC)=C1))C=CC=3C=C(OC)C(O)=C(OC)C=3	Arabidopsis thaliana|Boechera stricta|Capsella grandiflora|Eutrema salsugineum	Cinnamic acids and derivatives	Hydroxycinnamic acids and derivatives	1a	14948	chebi:27993|plantcyc:12-BIS-O-SINAPOYL-BETA-D-GLUCOSIDE|unpd:UNPD53584|chemspider:4444262|kegg ligand:C04275|pubchem cid:5280665|reaxys registry number:6993672	0.7788	0.7371	0.4532	0.3934	0.8675	0.7289	0.5464	0.6948	0.6118	0.5812	0.2955	0.3572	0.1351	0.1574	0.3775	0.4259	0.3359	0.004
243	pos_723	Unknown compound		2	pos	723	9.344	592.166	[M+H]+	Unknown																						0	0	0	0	0	0	0	0	0	0	0.3193	0.3886	0.3523	0.429	0.48	0.453	0.298	0.3821
244	pos_234	Simple ID	Other possible annotated peaks for this cluster.	5	pos	234	9.593	175.087	[M+H]+	Standard	C10H10N2O	1H-Indole-3-acetaldehyde; Oxime	4.5783	9.1566	(IROA) INDOLE-3-ACETAMIDE	3	88	175.087	[M+H]+	174.079	-1.06e-05	3.16		ZLIGRGHTISHYNH-WUXMJOGZSA-N	ON=CCC2=CNC1=CC=CC=C12	Arabidopsis halleri|Arabidopsis lyrata|Arabidopsis thaliana|Archangium gephyra|Boechera stricta|Brassica napus|Capsella rubella|Carica papaya	Indoles and derivatives	Indoles	1a	35512	dnp:HHY92|chebi:17545|knapsack:C00000110|plantcyc:CPD-13028|unpd:UNPD72002|cas:2776-06-9|chemspider:4522197|foodb:FDB030141|kegg ligand:C02937|pubchem cid:5371769|reaxys registry number:4989545	0.2133	0.3277	0.1415	0.1924	0.3732	0.3623	0.2085	0.2914	0.4465	0.2852	0.0198	0.0044	0.0071	0.009	0.005	0.017	0.0117	0.0161
245	pos_730	Double ID		3	pos	730	9.563	625.176	[M+H]+	genus	C28H32O16	3,3',4',5,7-Pentahydroxy-6-methoxyflavone; 3,7-Di-O-?-L-rhamnopyranoside	6.7838	13.5676	Unknown	3	74	625.176	[M+H]+	624.169	0.0006114	3.699		OFWABIAFTFHEHK-UHFFFAOYSA-N	O=C3C(OC1OC(C)C(O)C(O)C1(O))=C(OC4=CC(OC2OC(C)C(O)C(O)C2(O))=C(OC)C(O)=C34)C=5C=CC(O)=C(O)C=5	Kalanchoe spathulata	Flavonoids	Flavonoid glycosides	1b	1012968	dnp:KRV87	0	0	0	0.0055	0	0	0	0	0	0	1.9899	2.0622	1.9108	2.6901	2.1771	1.9598	1.6316	2.4909
246	pos_75	Simple ID		7	pos	75	7.992	130.065	[M+H]+	generic	C9H7N	Quinoline	5.4507	5.4507	Unknown	3	57	130.065	[M+H]+	129.058	0.0001257	2.938	Quinolines and derivatives	SMWDFEZZVXVKRB-UHFFFAOYSA-N	N1=CC=CC2=CC=CC=C12						HMDB=HMDB0033731,KNApSAcK=C00026478,ChEBI=CHEBI:17362,T3DB=T3D0634,FooDB=FDB011854,STOFF=STOFF_4597,UNPD=UNPD189494,BLEXP=BLEXPDB00000007047;BLEXPDB00004992033	5.4297	7.8032	4.419	6.6843	9.3802	8.6778	6.8926	8.0398	8.0413	6.8482	1.2211	0.8918	0.9026	1.0947	1.1673	1.3665	1.0967	1.0956
247	pos_76	Simple ID		1	pos	76	6.742	130.065	[M+H]+	generic	C9H7N	Quinoline	5.1774	5.1774	Unknown	3	55	130.065	[M+H]+	129.058	0.0001257	2.858	Quinolines and derivatives	SMWDFEZZVXVKRB-UHFFFAOYSA-N	N1=CC=CC2=CC=CC=C12						HMDB=HMDB0033731,KNApSAcK=C00026478,ChEBI=CHEBI:17362,T3DB=T3D0634,FooDB=FDB011854,STOFF=STOFF_4597,UNPD=UNPD189494,BLEXP=BLEXPDB00000007047;BLEXPDB00004992033	1.4527	1.5706	0.6697	0.6953	1.7528	1.6121	0.8265	1.0288	0.6953	1.0084	0.3871	0.3868	0.6202	0.6277	0.47	0.6324	0.5426	0.4295
248	pos_205	Simple ID	Other possible annotated peaks for this cluster.	2	pos	205	9.035	164.02	[M+H]+	genus	C5H9NOS2	1-Isothiocyanato-3-(methylthio)propane; S-Oxide (R-)|1-Isothiocyanato-3-(methylthio)propane; S-Oxide(?)	5.388	10.776	Unknown	3	112	164.02	[M+H]+	163.013	0.0001324	3.216		LELAOEBVZLPXAZ-UHFFFAOYSA-N	O=S(C)CCCN=C=S	Homo sapiens|Iberis amara	Sulfoxides		1b	16803	dnp:DDM11|chebi:89494|hmdb:HMDB0006095|agricola:IND20390343|cas:505-44-2|chemspider:10023|foodb:FDB008196|pmid:15740016|pubchem cid:10455|reaxys registry number:1722951	1.8048	1.3762	1.8955	1.2991	0.6848	1.4426	2.3714	1.1293	1.195	1.9345	0.0139	0.0064	0.0083	0.0038	0.0164	0	0.0072	0.006
249	pos_549	Simple ID	Other possible annotated peaks for this cluster.	5	pos	549	9.893	328.079	[M+Na]+	family	C15H15NO6	Ascorbigen	5.341	8.0115	Unknown	3	18	328.079	[M+Na]+	305.09	0.0001579	3.355		OMSJCIOTCFHSIT-UHFFFAOYSA-N	O=C2OC1C(O)COC1(O)C2(O)CC4=CNC3=CC=CC=C34		Furofurans	Isosorbides	1b	26947	dnp:BQW59|hmdb:HMDB0029839|cas:8075-98-7|chemspider:317840|foodb:FDB001054|pmid:19039806|pubchem cid:358022	1.055	0.2971	1.3046	0.1784	0.0843	0.3216	0.3074	0.248	0.3786	0.4714	0	0	0	0	0	0	0	0
250	neg_290	Double ID		6	neg	290	7.925	387.13	[M+FA-H]-	genus	C16H22O8	(2R,3S,4S,5R,6S)-2-(hydroxymethyl)-6-({4-[(1E)-3-hydroxyprop-1-en-1-yl]-2-methoxyphenylidene}oxy)oxane-3,4,5-triol	5.2683	10.5366	Unknown	3	2	387.13	[M+FA-H]-	342.131	-0.0001298	2.996		SFLMUHDGSQZDOW-VPMBJLDPNA-N	OCC=CC=2C=CC(OC1OC(CO)C(O)C(O)C1(O))=C(OC)C=2	Abies|Arabidopsis thaliana|Asparagus|Balanophora abbreviata|Beta|Carum carvi|Centranthus longiflorus|Fraxinus quadrangulata|Larix|Lonicera|Rhodiola crenulata|Scorzonera hispanica|Stachys	Organooxygen compounds	Carbohydrates and carbohydrate conjugates	1a	164477	knapsack:C00002727|cas:531-29-3	0.1807	0.1728	0.1568	0.2171	0.1453	0.1465	0.1404	0.1066	0.1783	0.1273	6.3484	5.3907	4.6238	6.3121	6.6515	6.4012	5.3671	7.6054
251	pos_86	Simple ID		1	pos	86	8.8	131.052	[M+H]+	generic	C6H10OS	2-Ethyldihydro-3(2H)-thiophenone	5.7149	5.7149	Unknown	3	52	131.053	[M+H]+	130.045	1.24e-05	2.824	Thiolanes	KNYBAJCQHFBMOP-UHFFFAOYNA-N	O=C1CCSC1CC						HMDB=HMDB0040238,FooDB=FDB019953	0.2164	0.5143	0.1086	0.1893	0.3735	0.8216	0.2653	0.3653	0.1914	0.1096	0	0	0.0038	0.0036	0.0049	0.0037	0	0.0032
252	pos_90	Simple ID		1	pos	90	3.019	132.102	[M+H]+	Standard	C6H13NO2	L-isoleucine	5.5045	11.009	(IROA) ISOLEUCINE	3	28	132.102	[M+H]+	131.095	0.0001051	3.386		AGPKZVBTJJNPAG-LXDRQGDMNA-N	O=C(O)C(N)C(C)CC	Arabidopsis thaliana|Escherichia coli			1a	197538	knapsack:C00001374|cas:73-32-5	2.5752	2.7169	1.9336	3.0029	2.4512	3.2357	1.9497	1.4055	3.6631	3.1059	5.0993	5.1427	5.1291	5.355	5.8197	4.5336	4.8381	5.1852
253	pos_91	Simple ID		1	pos	91	2.727	132.102	[M+H]+	Standard	C6H13NO2	L-isoleucine	5.522	11.044	(IROA) NORLEUCINE	3	32	132.102	[M+H]+	131.095	5.1e-06	3.373		AGPKZVBTJJNPAG-LXDRQGDMNA-N	O=C(O)C(N)C(C)CC	Arabidopsis thaliana|Escherichia coli			1a	197538	knapsack:C00001374|cas:73-32-5	2.1046	2.2635	1.6787	2.2087	2.1587	2.5157	1.6554	1.3506	2.6868	2.357	5.3934	5.6563	5.9897	5.9164	6.0813	4.6125	4.9888	5.7544
254	pos_93	Simple ID		1	pos	93	7.271	133.076	[M+H]+	generic	C8H8N2	4-Methylpyrrolo[1,2-a]pyrazine	6.4449	6.4449	Unknown	3	41	133.076	[M+H]+	132.069	0.0001247	3.735	Pyrrolopyrazines	GCXGRZISVBCADH-UHFFFAOYSA-N	N2=CC1=CC=CN1C(=C2)C						HMDB=HMDB0033173,FooDB=FDB011182,UNPD=UNPD110562	1.611	1.6043	1.1988	1.4407	1.7361	0.9117	1.1864	1.0195	1.1939	1.2231	1.181	1.0715	1.2035	1.3121	1.4123	0.9397	0.9937	0.9621
255	pos_96	Simple ID		1	pos	96	1.462	134.045	[M+H]+	genus	C4H7NO4	Aspartic acid|Aspartic acid; (R)-form|Aspartic acid; (S)-form|Aspartic acid; (?)-form	5.4754	10.9508	Unknown	3	58	134.045	[M+H]+	133.038	8.42e-05	3.164		CKLJMWTZIZZHCS-UHFFFAOYSA-N	O=C(O)CC(N)C(=O)O	Arabidopsis thaliana|Astragalus mongholicus|Brassica napus|Caenorhabditis elegans|Daphnia|Escherichia coli|Homo sapiens|Mus|Oryza sativa|Panax ginseng|Populus deltoides|Pseudomonas putida|Ruegeria pomeroyi|Saccharomyces cerevisiae|Sea|Solanum|Synechococcus elongatus	Carboxylic acids and derivatives	Amino acids, peptides, and analogues	1a	3368	dnp:FNR91|chebi:22660|hmdb:HMDB0062186|beilstein registry number:774618|cas:617-45-8|gmelin registry number:185140|kegg compounds:C16433|pmid:22264337|pubchem cid:424|reaxys registry number:774618|wikipedia:Aspartic_acid	2.3894	2.1994	2.3734	2.2994	2.3013	2.1322	1.9963	1.868	2.5032	2.0154	1.8275	1.7928	1.8885	1.6686	1.8175	1.7099	1.7761	1.5085
[truncated: 19 more columns]

## Sheet: OPLS-top ranked
Class	id	rt	mz	adducts	Dbase	MF	name	score	Smiles	Biosource	Class	subclass	Ref-Dbase
Jiffy	neg_244	1.182	333.059	[M-H]-	genus	C9H19O11P	3-Phosphoglyceroinositol	6.8749	O=P(O)(OCC(O)CO)OC1C(O)C(O)C(O)C(O)C1(O)	Arabidopsis thaliana|Daphnia|Escherichia coli	Glycerophospholipids	Glycerophosphoinositols	chebi:18321|hmdb:HMDB0011649|unpd:UNPD171337|bmdb:BMDB11649|cas:129830-95-1|chemspider:28184592|foodb:FDB011624|kegg compounds:C01225|metacyc:CPD-541|pmid:11413487|pubchem cid:45480544|reaxys registry number:3219210|ymdb:YMDB00781
Jiffy	neg_253	1.432	341.109	[M-H]-	genus	C12H22O11	sucrose	8.1656	OCC2OC(OC1(OC(CO)C(O)C1(O))(CO))C(O)C(O)C2(O)	Acer saccharum|Ajuga reptans|Aloe vera|Arabidopsis thaliana|Astragalus mongholicus|Beta vulgaris|Brassica oleracea|Caragana microphylla|Cucumis sativus|Curcuma|Derris oblonga|Dipsacus|Fritillaria unibracteata|Gastrodia elata|Genista corsica|Glycine max|Gossypium hirsutum|Helianthus annuus|Isatis|Marsdenia tomentosa|Nicotiana sylvestris|Notopterygium incisum|Paeonia peregrina|Panax ginseng|Petrose…	Organooxygen compounds	Carbohydrates and carbohydrate conjugates	knapsack:C00001151|cas:57-50-1
Jiffy	pos_27	1.305	116.071	[M+H]+	Standard	C5H9NO2	Proline	7.5066	O=C(O)C1NCCC1	Arabidopsis thaliana|Astragalus mongholicus|Brassica napus|Caenorhabditis elegans|Calanus helgolandicus|Crocus sativus|Daphnia|Homo sapiens|Mus|Oryza sativa|Panax ginseng|Pseudomonas putida|Rattus norvegicus|Ruegeria pomeroyi|Sea|Synechococcus elongatus|Vitis vinifera	Carboxylic acids and derivatives	Amino acids, peptides, and analogues	dnp:BDS30|chebi:26271|beilstein registry number:80809|cas:609-36-9|gmelin registry number:26927|kegg compounds:C16435|pmid:16534801|reaxys registry number:80809|wikipedia:Proline
Jiffy	neg_285	8.88	385.114	[M-H]-	genus	C17H22O10	1-O-sinapoyl-D-glucose	6.5356	O=C(OC1OC(CO)C(O)C(O)C1(O))C=CC=2C=C(OC)C(O)=C(OC)C=2	Arabidopsis thaliana	Cinnamic acids and derivatives	Hydroxycinnamic acids and derivatives	knapsack:C00013592|cas:14364-09-1
Hydroponic	pos_71	2.386	130.05	[M+H]+	Standard	C5H7NO3	oxoproline	5.9057	O=C(O)C1N=CC(O)C1	Arabidopsis thaliana|Homo sapiens	Carboxylic acids and derivatives	Amino acids, peptides, and analogues	dnp:BCS38|chebi:27391|hmdb:HMDB0001369|beilstein registry number:121071|bigg:43511|cas:22573-88-2|chemspider:1030|foodb:FDB022582|kegg compounds:C04281|metacyc:PYRROLINE-HYDROXY-CARBOXYLATE|metlin:6196|pmid:10379660|pubchem cid:1059
Hydroponic	neg_59	1.243	174.088	[M-H]-	Standard	C6H13N3O3	citrulline	4.9238	O=C(O)C(N)CCCNC(=N)O	Arabidopsis thaliana|Citrullus|Escherichia coli|Sesamum indicum			knapsack:C00001348|cas:372-75-8
Hydroponic	neg_346	11.884	476.109	[M-H]-	genus	C16H31NO9S3	8-Methylthio-octyl glucosinolate	4.3484	O=S(=O)(O)ON=C(CCCCCCCCSC)SC1OC(CO)C(O)C(O)C1(O)	Arabidopsis thaliana|Arabis amplexicaulis|Arabis hirsuta|Arabis stelleri|Boechera holboellii|Crucihimalaya wallichii|Nasturtium officinale|Rorippa indica|Rorippa sylvestris|Sibara	Organooxygen compounds	Carbohydrates and carbohydrate conjugates	chebi:80989|knapsack:C00007356|plantcyc:CPDQT-300|unpd:UNPD58616|cas:80667-68-1|foodb:FDB030633|pubchem cid:44237373
Hydroponic	neg_21	1.171	145.062	[M-H]-	genus	C5H10N2O3	Glutamine	7.205	O=C(O)C(N)CCC(=N)O	Arabidopsis thaliana|Astragalus mongholicus|Daphnia|Homo sapiens|Oryza sativa|Populus deltoides|Schizosaccharomyces pombe	Carboxylic acids and derivatives	Amino acids, peptides, and analogues	dnp:HCL78|knapsack:C00001359|beilstein registry number:1723795|cas:585-21-7|gmelin registry number:27318|reaxys registry number:1723795|wikipedia:Glutamine
High density	pos_324	10.253	207.065	[M+H-H2O]+	genus	C11H12O5	sinapate	6.6885	O=C([O-])C=CC=1C=C(OC)C(O)=C(OC)C=1	Aegilops tauschii|Anacardium occidentale|Ananas comosus|Aquilegia coerulea|Arabidopsis thaliana|Asparagus officinalis|Boechera stricta|Brassica napus|Brassica rapa|Camptotheca acuminata|Citrus|Corchorus capsularis|Cucumis sativus|Daucus carota|Dianthus caryophyllus|Dioscorea|Eutrema salsugineum|Gossypium raimondii|Hordeum vulgare|Humulus lupulus|Kalanchoe fedtschenkoi|Kalanchoe laxiflora|Linum us…	Cinnamic acids and derivatives	Hydroxycinnamic acids and derivatives	chebi:30023|hmdb:HMDB32616|plantcyc:SINAPATE|cas:530-59-6|chemspider:4573878|kegg ligand:C00482|nci:59261|pubchem cid:5460292|refmet:Sinapic acid
High density	pos_396	15.182	234.098	[M+H]+	genus	C10H19NOS2	1-Isothiocyanato-8-(methylthio)octane- S-Oxide(R-)	5.5592	O=S(C)CCCCCCCCN=C=S	Arabidopsis thaliana|Arabis hirsuta|Diplotaxis harra|Erucaria microcarpa|Rorippa indica|Rorippa sylvestris|Sibara	Sulfoxides		dnp:JVF78|chebi:91152|hmdb:HMDB0035923|knapsack:C00000138|cas:31456-68-5|chemspider:7970426|foodb:FDB014717|pmid:10404541|pubchem cid:9794659|reaxys registry number:1708483
High density	pos_452	5.457	268.104	[M+H]+	Standard	C10H13N5O4	Adenosine	8.4451	OCC3OC(N2C=NC1=C(N=CN=C12)N)C(O)C3(O)	Acanthus ebracteatus|Acanthus ilicifolius|Adiantum lunulatum|Allium tuberosum|Arabidopsis thaliana|Atractylodes lancea|Capparis flavicans|Cassytha filiformis|Citrus|Codonopsis|Crocus sativus|Cucumis sativus|Dioscorea|Fritillaria cirrhosa|Gastrodia elata|Junceella juncea|Oxytropis myriophylla|Strychnos lucida|Subergorgia suberosa|Zea mays			knapsack:C00007444|cas:58-61-7
High density	neg_330	8.074	447.054	[M-H]-	genus	C16H20N2O9S2	Glucobrassicin	5.3442	O=S(=O)(O)ON=C(CC2=CNC1=CC=CC=C12)SC3OC(CO)C(O)C(O)C3(O)	Arabidopsis thaliana|Armoracia|Barbarea vulgaris|Batis maritima|Brassica juncea|Brassica napus|Brassica oleracea|Brassica rapa|Capparis spinosa|Cleome anomala|Cleome monophylla|Conringia orientalis|Diplotaxis erucoides|Isatis tinctoria|Lepidium graminifolium|Lepidium montanum|Lepidium sativum|Moricandia arvensis|Raphanus sativus|Reseda alba|Reseda complicata|Reseda crystallina|Reseda lutea|Reseda…	Organooxygen compounds	Carbohydrates and carbohydrate conjugates	knapsack:C00000125|cas:4356-52-9
